# Supplementary material for: Transcriptional Responses of the Bdtf1-Deletion Mutant to the Phytoalexin Brassinin in the Necrotrophic Fungus Alternaria brassicicola
Source: Molecules. 2014 Jul 24;19(8):10717–32. doi: 10.3390/molecules190810717 (PMC6270968; doi:10.3390/molecules190810717)
Supplement: Supplementary File 1 [file molecules-19-10717-s001.xlsx]

## Sheet: Table S1
Table S1. Differentially expressed genes during plant infection
ProteinId	44hpiWt	44hpiFtf1	PFAM annotation	GO annotation	44hpiWt -> 44hpiFtf1: Up/Down	44hpiWt -> 44hpiFtf1: q value	ration(m/w)	44hpiWt -> 44hpiFtf1: >2-fold and significant difference?	log ratio
53	84.4937	234.775	PF01619:Proline dehydrogenase ;	GO:0051700-fructosyl-amino acid oxidase activity ; GO:0006562-proline catabolic process ; GO:0006537-glutamate biosynthetic process ; GO:0004657-proline dehydrogenase activity ; GO:0004154-dihydropterin oxidase activity ; GO:0019116-hydroxy-nicotine oxidase activity ; GO:0051699-proline oxidase activity ;	Up	0	2.77861	Yes	1.47436
94	11.5852	25.7617			Up	1.09625e-11	2.22367	Yes	1.15294
128	768.923	1792.39	PF00686:Glycoside hydrolase, starch-binding ;	GO:0003824-catalytic activity ; GO:0005975-carbohydrate metabolic process ;	Up	0	2.33104	Yes	1.22097
143	87.5762	227.39	PF00150:Glycoside hydrolase, family 5 ;	GO:0004553-hydrolase activity, hydrolyzing O-glycosyl compounds ; GO:0005975-carbohydrate metabolic process ; GO:0004338-glucan 1,3-beta-glucosidase activity ;	Up	0	2.59648	Yes	1.37656
164	312.506	809.009	PF00135:Carboxylesterase, type B ;	GO:0004091-carboxylesterase activity ;	Up	0	2.58878	Yes	1.37227
328	15.6726	32.3234			Up	8.48549e-10	2.06241	Yes	1.04433
417	210.838	519.247			Up	0	2.46278	Yes	1.30029
503	29.7275	63.5814		GO:0016020-membrane ; GO:0006118-electron transport ; GO:0016491-oxidoreductase activity ;	Up	0	2.13881	Yes	1.09681
565	464.37	1068.77	PF00544:Pectate lyase/Amb allergen ;		Up	0	2.30155	Yes	1.2026
615	164.44	400.467	PF00457:Glycoside hydrolase, family 11 ;	GO:0004553-hydrolase activity, hydrolyzing O-glycosyl compounds ; GO:0005975-carbohydrate metabolic process ;	Up	0	2.43534	Yes	1.28412
715	7.73127	16.7603			Up	1.02611e-10	2.16786	Yes	1.11627
732	1.24879	7.3449			Up	8.35434e-05	5.88161	Yes	2.55621
748	8.01814	18.32			Up	0	2.28482	Yes	1.19208
904	225.249	737.856	PF00544:Pectate lyase/Amb allergen ;		Up	0	3.27573	Yes	1.71182
926	2.86878	8.44118			Up	7.11596e-05	2.94243	Yes	1.55701
952	57.1391	127.271	PF07646:Kelch ; PF01344:Kelch repeat ; PF00024:N/apple PAN ;		Up	0	2.22739	Yes	1.15535
1151	830.565	1854.59	PF01965:ThiJ/PfpI ;		Up	0	2.23293	Yes	1.15894
1210	352.314	719.545			Up	0	2.04234	Yes	1.03022
1332	1067.26	2492.07	PF03211:Pectate lyase ;	GO:0005576-extracellular region ; GO:0030570-pectate lyase activity ;	Up	0	2.33502	Yes	1.22343
1335	9.17412	28.8727	PF04488:Glycosyltransferase sugar-binding region containing DXD motif ;	GO:0033164-glycolipid 6-alpha-mannosyltransferase activity ;	Up	0	3.14719	Yes	1.65406
1336	8.94556	32.2733		GO:0005840-ribosome ; GO:0003735-structural constituent of ribosome ; GO:0003676-nucleic acid binding ; GO:0005622-intracellular ; GO:0006412-translation ;	Up	0	3.60775	Yes	1.8511
1487	11.8081	28.551			Up	8.92188e-13	2.41792	Yes	1.27376
1540	48.4789	320.148			Up	0	6.60386	Yes	2.72331
1674	5.53953	52.7419	PF01083:Cutinase ;	GO:0005576-extracellular region ; GO:0016787-hydrolase activity ; GO:0050525-cutinase activity ; GO:0008152-metabolic process ;	Up	0	9.52101	Yes	3.25111
1760	39.9371	80.5833		GO:0046872-metal ion binding ; GO:0030001-metal ion transport ;	Up	1.04594e-12	2.01776	Yes	1.01275
1821	1.02698	7.20374			Up	1.17536e-10	7.01449	Yes	2.81034
1871	32.7018	66.1033	PF00445:Ribonuclease T2 ;	GO:0004521-endoribonuclease activity ; GO:0003723-RNA binding ; GO:0033897-ribonuclease T2 activity ;	Up	0	2.0214	Yes	1.01535
1940	53.1545	111.686		GO:0004308-exo-alpha-sialidase activity ;	Up	0	2.10116	Yes	1.07118
2150	6.70825	16.3836			Up	0.0459447	2.44231	Yes	1.28824
2403	3.52354	9.28525			Up	3.5067e-06	2.6352	Yes	1.39792
2424	60.4396	139.818	PF02156:Glycoside hydrolase, family 26 ;	GO:0016985-mannan endo-1,4-beta-mannosidase activity ; GO:0006080-substituted mannan metabolic process ;	Up	0	2.31335	Yes	1.20998
2447	10.3934	42.3522			Up	3.03824e-10	4.07491	Yes	2.02677
2489	28.9171	63.9221			Up	1.1485e-12	2.21053	Yes	1.14439
2531	4.16673	8.74082	PF00098:Zn-finger, CCHC type ;	GO:0003676-nucleic acid binding ; GO:0008270-zinc ion binding ;	Up	0.000260726	2.09776	Yes	1.06885
2607	19.6811	57.426			Up	0	2.91782	Yes	1.54489
2713	13.9411	43.494			Up	0.0433032	3.11984	Yes	1.64147
2942	15.3572	52.4761			Up	0	3.41704	Yes	1.77275
2998	0.664181	2.08232		GO:0008471-laccase activity ;	Up	0.000212007	3.13517	Yes	1.64854
3016	25.2516	90.6533		GO:0003900-DNA-directed RNA polymerase I activity ; GO:0003902-DNA-directed RNA polymerase III activity ; GO:0003899-DNA-directed RNA polymerase activity ; GO:0034062-RNA polymerase activity ; GO:0003901-DNA-directed RNA polymerase II activity ;	Up	0	3.59	Yes	1.84398
3017	37.5596	125.044			Up	0	3.32922	Yes	1.73518
3063	334.714	870.402	PF01055:Glycoside hydrolase, family 31 ;	GO:0004553-hydrolase activity, hydrolyzing O-glycosyl compounds ; GO:0005975-carbohydrate metabolic process ;	Up	0	2.60043	Yes	1.37875
3295	21.028	105.099			Up	0	4.99805	Yes	2.32137
3437	376.213	845.297			Up	0	2.24686	Yes	1.16791
3542	7.81097	32.2902	PF00150:Glycoside hydrolase, family 5 ;	GO:0004553-hydrolase activity, hydrolyzing O-glycosyl compounds ; GO:0005975-carbohydrate metabolic process ; GO:0004338-glucan 1,3-beta-glucosidase activity ;	Up	0	4.13396	Yes	2.04752
3746	189.965	382.666			Up	0	2.0144	Yes	1.01035
3753	197.168	532.32	PF00150:Glycoside hydrolase, family 5 ;	GO:0004553-hydrolase activity, hydrolyzing O-glycosyl compounds ; GO:0005975-carbohydrate metabolic process ;	Up	0	2.69983	Yes	1.43287
3757	182.268	409.571	PF00067:Cytochrome P450 ;	GO:0006118-electron transport ; GO:0003676-nucleic acid binding ; GO:0004497-monooxygenase activity ; GO:0020037-heme binding ; GO:0005506-iron ion binding ;	Up	0	2.24708	Yes	1.16805
4077	9.12494	38.2624	PF01532:Glycoside hydrolase, family 47 ;	GO:0004571-mannosyl-oligosaccharide 1,2-alpha-mannosidase activity ; GO:0016020-membrane ; GO:0005509-calcium ion binding ;	Up	0	4.19317	Yes	2.06804
4118	37.9606	82.7029	PF00704:Glycoside hydrolase, family 18 ;	GO:0006032-chitin catabolic process ; GO:0004553-hydrolase activity, hydrolyzing O-glycosyl compounds ; GO:0005975-carbohydrate metabolic process ; GO:0008843-endochitinase activity ; GO:0004568-chitinase activity ;	Up	0	2.17865	Yes	1.12344
4154	2.33522	6.4225		GO:0003676-nucleic acid binding ;	Up	4.94918e-12	2.75028	Yes	1.45958
4192	8.19405	20.2969		GO:0016021-integral to membrane ; GO:0006810-transport ; GO:0005215-transporter activity ;	Up	0	2.47703	Yes	1.30861
4219	10.9793	25.9667			Up	0	2.36506	Yes	1.24188
4265	0.0689903	1.24106			Up	0.000292555	17.9889	Yes	4.16904
4305	12.5902	71.9322			Up	0	5.71335	Yes	2.51434
4330	6.52885	14.0642			Up	4.67917e-09	2.15416	Yes	1.10713
4331	9.3264	20.1934			Up	2.04297e-09	2.16519	Yes	1.11449
4350	46.9425	105.121			Up	0	2.23936	Yes	1.16308
4369	1.73173	3.75665			Up	9.71284e-06	2.1693	Yes	1.11723
4415	4.59435	18.2933			Up	1.02438e-07	3.98169	Yes	1.99338
4421	11.8119	47.7395	PF00355:Rieske [2Fe-2S] region ;	GO:0016491-oxidoreductase activity ; GO:0006725-aromatic compound metabolic process ; GO:0005506-iron ion binding ; GO:0018619-benzene 1,2-dioxygenase activity ; GO:0006118-electron transport ; GO:0051537-2 iron, 2 sulfur cluster binding ;	Up	0	4.04164	Yes	2.01494
4439	1.30184	5.85432			Up	1.75022e-13	4.49696	Yes	2.16895
4485	11.4791	31.5329			Up	0	2.74698	Yes	1.45785
4486	396.115	846.819	PF00083:General substrate transporter ;	GO:0016021-integral to membrane ; GO:0016020-membrane ; GO:0005215-transporter activity ; GO:0008643-carbohydrate transport ; GO:0006810-transport ; GO:0005351-sugar:hydrogen symporter activity ; GO:0008733-L-arabinose isomerase activity ;	Up	0	2.13781	Yes	1.09613
4545	511.62	1253.31	PF01055:Glycoside hydrolase, family 31 ;	GO:0004553-hydrolase activity, hydrolyzing O-glycosyl compounds ; GO:0005975-carbohydrate metabolic process ;	Up	7.4304e-09	2.44969	Yes	1.2926
4619	1.84247	6.58948	PF05270:Alpha-L-arabinofuranosidase B ;	GO:0046373-L-arabinose metabolic process ; GO:0046556-alpha-N-arabinofuranosidase activity ;	Up	1.23895e-09	3.57644	Yes	1.83852
4634	17.2053	34.7289			Up	1.78751e-14	2.0185	Yes	1.01328
4635	4.99125	10.6726			Up	1.21898e-06	2.13826	Yes	1.09644
4706	83.9617	250.379	PF01975:Survival protein SurE ;	GO:0016787-hydrolase activity ;	Up	0	2.98206	Yes	1.57631
4707	3.24603	6.91629			Up	0.00363911	2.13069	Yes	1.09132
4786	2.89787	5.91024			Up	0.0383569	2.03951	Yes	1.02822
4791	6.50859	17.3106		GO:0016021-integral to membrane ; GO:0006810-transport ; GO:0005215-transporter activity ;	Up	4.6036e-15	2.65965	Yes	1.41124
4813	111.699	375.878	PF03211:Pectate lyase ;	GO:0005576-extracellular region ; GO:0030570-pectate lyase activity ;	Up	0	3.3651	Yes	1.75065
5054	14.4124	31.2476	PF01116:Ketose-bisphosphate aldolase, class-II ;	GO:0006096-glycolysis ; GO:0043801-hexulose-6-phosphate synthase activity ; GO:0018802-2,4-dihydroxyhept-2-ene-1,7-dioate aldolase activity ; GO:0043876-D-threonine aldolase activity ; GO:0008732-L-allo-threonine aldolase activity ; GO:0004332-fructose-bisphosphate aldolase activity ; GO:0008270-zinc ion binding ; GO:0004553-hydrolase activity, hydrolyzing O-glycosyl compounds ; GO:0005975-carboh…	Up	1.94573e-12	2.16811	Yes	1.11643
5058	3.71185	8.14927		GO:0016021-integral to membrane ; GO:0006810-transport ; GO:0003677-DNA binding ; GO:0005215-transporter activity ;	Up	2.99796e-06	2.19547	Yes	1.13453
5116	21.2632	47.2766			Up	0	2.2234	Yes	1.15277
5390	671.558	1592.19	PF01670:Glycoside hydrolase, family 12 ;	GO:0004190-aspartic-type endopeptidase activity ; GO:0000272-polysaccharide catabolic process ; GO:0008810-cellulase activity ; GO:0006508-proteolysis ;	Up	0	2.37089	Yes	1.24543
5436	4.55239	10.4336		GO:0004289-subtilase activity ; GO:0006508-proteolysis ;	Up	2.53829e-13	2.2919	Yes	1.19654
5484	89.3087	183.964			Up	0	2.05987	Yes	1.04255
5485	232.749	559.214		GO:0003868-4-hydroxyphenylpyruvate dioxygenase activity ;	Up	0	2.40265	Yes	1.26463
5497	58.5391	146.685	PF04433:SWIRM ;		Up	0	2.50576	Yes	1.32525
5507	11.4831	27.2864	PF01565:FAD linked oxidase, N-terminal ; PF00187:Chitin-binding, type 1 ;	GO:0050660-FAD binding ; GO:0008061-chitin binding ; GO:0016491-oxidoreductase activity ;	Up	0	2.37622	Yes	1.24867
5539	2.04444	5.3948		GO:0016491-oxidoreductase activity ;	Up	2.36675e-05	2.63877	Yes	1.39986
5652	367.729	756.157			Up	0	2.05629	Yes	1.04004
5658	0.60122	1.67005		GO:0006810-transport ; GO:0016020-membrane ; GO:0005215-transporter activity ;	Up	0.00730564	2.77777	Yes	1.47393
5961	24.0113	136.884			Up	0	5.70082	Yes	2.51117
6080	1122.9	2652.85	PF00128:Alpha amylase, catalytic region ; PF00686:Glycoside hydrolase, starch-binding ;	GO:0004556-alpha-amylase activity ; GO:0003824-catalytic activity ; GO:0005975-carbohydrate metabolic process ; GO:0043169-cation binding ;	Up	5.12549e-05	2.3625	Yes	1.24031
6189	6.55314	33.1261	PF00891:O-methyltransferase, family 2 ;	GO:0003824-catalytic activity ; GO:0008171-O-methyltransferase activity ;	Up	0	5.055	Yes	2.33771
6252	49.4218	178.623	PF01341:Glycoside hydrolase, family 6 ;	GO:0004553-hydrolase activity, hydrolyzing O-glycosyl compounds ; GO:0005975-carbohydrate metabolic process ;	Up	0	3.61426	Yes	1.8537
6313	487.098	2251.56	PF07249:Cerato-platanin ;		Up	0	4.6224	Yes	2.20864
6321	1.19397	3.16667	PF00561:Alpha/beta hydrolase fold ;	GO:0003824-catalytic activity ;	Up	0.00707452	2.65222	Yes	1.4072
6461	12.7121	30.4312	PF00083:General substrate transporter ;	GO:0016021-integral to membrane ; GO:0016020-membrane ; GO:0005215-transporter activity ; GO:0008643-carbohydrate transport ; GO:0006810-transport ; GO:0005351-sugar:hydrogen symporter activity ; GO:0008733-L-arabinose isomerase activity ;	Up	0	2.39388	Yes	1.25935
6538	18.7708	44.9731		GO:0005267-potassium channel activity ; GO:0016020-membrane ; GO:0006813-potassium ion transport ;	Up	0	2.39591	Yes	1.26057
6545	8.31416	18.0478			Up	0.000818452	2.17073	Yes	1.11818
6561	4.10073	19.4747			Up	0	4.74908	Yes	2.24765
6581	20.173	48.1217	PF00732:Glucose-methanol-choline oxidoreductase ;	GO:0016614-oxidoreductase activity, acting on CH-OH group of donors ; GO:0050660-FAD binding ;	Up	0	2.38545	Yes	1.25426
6582	40.4905	103.963		GO:0016491-oxidoreductase activity ; GO:0005506-iron ion binding ; GO:0009058-biosynthetic process ;	Up	0	2.56759	Yes	1.36041
6621	2.21486	4.68855			Up	0.0151501	2.11686	Yes	1.08193
6626	0.855633	1.88644			Up	0.0296639	2.20473	Yes	1.1406
6658	217.589	453.082	PF00194:Carbonic anhydrase, eukaryotic ;	GO:0006730-one-carbon compound metabolic process ; GO:0008270-zinc ion binding ; GO:0004089-carbonate dehydratase activity ;	Up	0	2.08228	Yes	1.05817
6720	2.1178	8.28738			Up	8.39993e-05	3.9132	Yes	1.96835
6744	17.1326	57.6079	PF00083:General substrate transporter ;	GO:0016021-integral to membrane ; GO:0016020-membrane ; GO:0005215-transporter activity ; GO:0008643-carbohydrate transport ; GO:0006810-transport ; GO:0005351-sugar:hydrogen symporter activity ; GO:0008733-L-arabinose isomerase activity ;	Up	0	3.36247	Yes	1.74952
6750	5.22185	12.8148			Up	4.23319e-08	2.45407	Yes	1.29518
6751	109.548	303.085			Up	0	2.76669	Yes	1.46816
6885	7.74066	20.8547			Up	1.71364e-13	2.69418	Yes	1.42984
6906	214.69	608.809	PF00150:Glycoside hydrolase, family 5 ;	GO:0004553-hydrolase activity, hydrolyzing O-glycosyl compounds ; GO:0005975-carbohydrate metabolic process ;	Up	0	2.83576	Yes	1.50373
6925	32.207	74.952		GO:0016021-integral to membrane ; GO:0006810-transport ; GO:0005215-transporter activity ;	Up	0	2.3272	Yes	1.21859
6928	3.62193	8.01854			Up	0.00434041	2.21389	Yes	1.14658
7114	9.61178	20.4379		GO:0005576-extracellular region ; GO:0003824-catalytic activity ;	Up	1.87941e-08	2.12634	Yes	1.08837
7151	8.4286	18.6361	PF00069:Protein kinase ;	GO:0005524-ATP binding ; GO:0006468-protein amino acid phosphorylation ; GO:0004674-protein serine/threonine kinase activity ; GO:0004672-protein kinase activity ;	Up	0	2.21106	Yes	1.14474
7152	64.1946	203.106	PF00703:Glycoside hydrolase family 2, immunoglobulin-like beta-sandwich domain ; PF02837:Glycoside hydrolase, family 2, sugar binding ;	GO:0004566-beta-glucuronidase activity ; GO:0004553-hydrolase activity, hydrolyzing O-glycosyl compounds ; GO:0005975-carbohydrate metabolic process ;	Up	0	3.16391	Yes	1.66171
7290	5.66532	14.6685			Up	3.44773e-06	2.58917	Yes	1.37249
7296	25.5682	52.6269			Up	0.000411448	2.0583	Yes	1.04145
7373	49.8568	134.009	PF06422:CDR ABC transporter ; PF00005:ABC transporter ;	GO:0016021-integral to membrane ; GO:0042626-ATPase activity, coupled to transmembrane movement of substances ; GO:0017111-nucleoside-triphosphatase activity ; GO:0006810-transport ; GO:0000166-nucleotide binding ; GO:0016887-ATPase activity ; GO:0005524-ATP binding ;	Up	0	2.68788	Yes	1.42647
7374	28.5063	75.5726	PF00005:ABC transporter ;	GO:0016887-ATPase activity ; GO:0005524-ATP binding ;	Up	0	2.65108	Yes	1.40658
7399	10.4364	47.9016	PF00106:Short-chain dehydrogenase/reductase SDR ;	GO:0008678-2-deoxy-D-gluconate 3-dehydrogenase activity ; GO:0016491-oxidoreductase activity ; GO:0008152-metabolic process ;	Up	0	4.58986	Yes	2.19845
7401	3.00246	63.547		GO:0045551-cinnamyl-alcohol dehydrogenase activity ;	Up	0	21.165	Yes	4.40361
7402	6.01136	105.501	PF02668:Taurine catabolism dioxygenase TauD/TfdA ;	GO:0016491-oxidoreductase activity ; GO:0043826-sulfur oxygenase reductase activity ; GO:0051341-regulation of oxidoreductase activity ; GO:0043738-F420H2 dehydrogenase activity ; GO:0006118-electron transport ; GO:0043883-malolactic enzyme activity ;	Up	0	17.5503	Yes	4.13342
7403	3.05993	79.3092			Up	0	25.9186	Yes	4.69592
7405	3.95668	15.7573	PF00891:O-methyltransferase, family 2 ;	GO:0008171-O-methyltransferase activity ;	Up	0	3.98245	Yes	1.99366
7406	4.78541	114.143			Up	0	23.8523	Yes	4.57606
7407	5.21179	48.2111	PF01040:UbiA prenyltransferase ;	GO:0016021-integral to membrane ; GO:0043766-Sep-tRNA:Cys-tRNA synthase activity ; GO:0008318-protein prenyltransferase activity ; GO:0004659-prenyltransferase activity ; GO:0046428-1,4-dihydroxy-2-naphthoate octaprenyltransferase activity ; GO:0008495-protoheme IX farnesyltransferase activity ; GO:0004661-protein geranylgeranyltransferase activity ; GO:0008412-4-hydroxybenzoate octaprenyltransfe…	Up	0	9.25039	Yes	3.20951
7409	5.42995	29.1257			Up	0	5.3639	Yes	2.42328
7436	12.6683	32.427	PF00544:Pectate lyase/Amb allergen ;		Up	0	2.5597	Yes	1.35597
7438	8.5369	17.1406	PF00724:NADH:flavin oxidoreductase/NADH oxidase ;	GO:0003959-NADPH dehydrogenase activity ; GO:0010181-FMN binding ; GO:0016491-oxidoreductase activity ;	Up	3.0759e-08	2.00782	Yes	1.00563
7683	10.0245	20.4262			Up	0.0240016	2.03763	Yes	1.02689
7785	5.32964	11.3296			Up	1.63197e-10	2.12577	Yes	1.08799
8011	43.0003	98.1774			Up	0	2.28318	Yes	1.19104
8013	208.584	495.297		GO:0008270-zinc ion binding ; GO:0006508-proteolysis ; GO:0008237-metallopeptidase activity ;	Up	0	2.37457	Yes	1.24767
8086	85.0454	224.34	PF00083:General substrate transporter ;	GO:0016021-integral to membrane ; GO:0016020-membrane ; GO:0005215-transporter activity ; GO:0008643-carbohydrate transport ; GO:0006810-transport ; GO:0005351-sugar:hydrogen symporter activity ; GO:0008733-L-arabinose isomerase activity ;	Up	0	2.63789	Yes	1.39938
8145	3.68069	23.6045			Up	0	6.41306	Yes	2.68101
8158	46.1222	106.99	PF00291:Pyridoxal-5'-phosphate-dependent enzyme, beta subunit ;	GO:0003824-catalytic activity ; GO:0006520-amino acid metabolic process ; GO:0008152-metabolic process ; GO:0030170-pyridoxal phosphate binding ;	Up	0	2.31971	Yes	1.21394
8218	0.479981	0.980489			Up	0.020824	2.04277	Yes	1.03052
8273	2.96515	6.93799	PF00646:Cyclin-like F-box ;		Up	2.6719e-08	2.33984	Yes	1.22641
8283	3.59585	10.4771			Up	4.6924e-05	2.91366	Yes	1.54283
8359	3.17546	14.286			Up	1.23164e-05	4.49888	Yes	2.16956
8533	0.268449	1.60746			Up	0.00499088	5.98795	Yes	2.58206
8534	40.7921	160.515			Up	0	3.93495	Yes	1.97635
8616	5.37754	26.2337	PF00187:Chitin-binding, type 1 ; PF00024:N/apple PAN ;	GO:0008061-chitin binding ;	Up	0	4.87838	Yes	2.2864
8751	22.236	47.4245	PF00933:Glycoside hydrolase, family 3, N-terminal ; PF01915:Glycoside hydrolase, family 3, C-terminal ;	GO:0004553-hydrolase activity, hydrolyzing O-glycosyl compounds ; GO:0005975-carbohydrate metabolic process ; GO:0008422-beta-glucosidase activity ;	Up	0	2.13278	Yes	1.09274
8801	8.26696	29.0812			Up	0	3.51776	Yes	1.81466
8874	22.9072	50.6273			Up	0	2.2101	Yes	1.14411
9087	81.3754	192.723	PF01179:Copper amine oxidase ;	GO:0005507-copper ion binding ; GO:0009308-amine metabolic process ; GO:0008131-amine oxidase activity ; GO:0048038-quinone binding ;	Up	0	2.36832	Yes	1.24386
9101	2216.15	4575.67			Up	0	2.06469	Yes	1.04593
9287	9.418	19.6781			Up	4.5515e-12	2.08941	Yes	1.0631
9372	109.654	301.917			Up	0	2.75336	Yes	1.46119
9460	77.653	217.624	PF03055:Retinal pigment epithelial membrane protein ;	GO:0016215-CoA desaturase activity ; GO:0018688-DDT 2,3-dioxygenase activity ; GO:0042389-omega-3 fatty acid desaturase activity ; GO:0018689-naphthalene disulfonate 1,2-dioxygenase activity ;	Up	0	2.80252	Yes	1.48672
9476	19.6211	39.5765			Up	0	2.01704	Yes	1.01224
9503	13.5152	68.9334			Up	0	5.10044	Yes	2.35062
9513	298.546	666.445			Up	0	2.2323	Yes	1.15853
9526	1.31633	5.18107	PF03639:Glycoside hydrolase, family 81 ;		Up	0	3.936	Yes	1.97673
9637	0.8683	2.51783	PF05199:GMC oxidoreductase ; PF00732:Glucose-methanol-choline oxidoreductase ;	GO:0008812-choline dehydrogenase activity ; GO:0016614-oxidoreductase activity, acting on CH-OH group of donors ; GO:0050660-FAD binding ;	Up	0.000131345	2.89972	Yes	1.53592
9677	255.226	516.645	PF05922:Proteinase inhibitor I9, subtilisin propeptide ; PF00082:Peptidase S8 and S53, subtilisin, kexin, sedolisin ;	GO:0006508-proteolysis ; GO:0016808-proprotein convertase activity ; GO:0008132-pancreatic elastase activity ; GO:0008243-plasminogen activator activity ; GO:0008991-serine-type signal peptidase activity ; GO:0042802-identical protein binding ; GO:0043086-negative regulation of catalytic activity ; GO:0004289-subtilase activity ;	Up	0	2.02426	Yes	1.0174
9751	1.29133	2.65866	PF01565:FAD linked oxidase, N-terminal ;	GO:0050660-FAD binding ; GO:0016491-oxidoreductase activity ;	Up	0.0128984	2.05885	Yes	1.04184
9762	68.8826	148.87	PF01055:Glycoside hydrolase, family 31 ;	GO:0004558-alpha-glucosidase activity ; GO:0004553-hydrolase activity, hydrolyzing O-glycosyl compounds ; GO:0005975-carbohydrate metabolic process ;	Up	0	2.16121	Yes	1.11184
9919	681.861	1395.77	PF00840:Glycoside hydrolase, family 7 ;	GO:0004553-hydrolase activity, hydrolyzing O-glycosyl compounds ; GO:0005975-carbohydrate metabolic process ;	Up	1.02499e-13	2.047	Yes	1.03351
9920	642.99	1318.65	PF00840:Glycoside hydrolase, family 7 ;	GO:0004553-hydrolase activity, hydrolyzing O-glycosyl compounds ; GO:0005975-carbohydrate metabolic process ;	Up	0	2.05081	Yes	1.03619
9925	3.29561	8.847	PF00291:Pyridoxal-5'-phosphate-dependent enzyme, beta subunit ;	GO:0003824-catalytic activity ; GO:0008152-metabolic process ; GO:0030170-pyridoxal phosphate binding ;	Up	1.61121e-10	2.68448	Yes	1.42464
9952	292.485	1607.74	PF04758:Ribosomal protein S30 ;	GO:0005840-ribosome ; GO:0003735-structural constituent of ribosome ; GO:0005622-intracellular ; GO:0006412-translation ;	Up	0	5.49683	Yes	2.4586
10039	866.144	1769.7			Up	0	2.04319	Yes	1.03083
10079	1.06928	3.0199	PF06985:Heterokaryon incompatibility ;		Up	1.66935e-06	2.82424	Yes	1.49786
10154	35.1817	104.637	PF01120:Glycoside hydrolase, family 29 (alpha-L-fucosidase) ;	GO:0004560-alpha-L-fucosidase activity ; GO:0005975-carbohydrate metabolic process ;	Up	0	2.97419	Yes	1.5725
10170	6.69338	19.6336			Up	0	2.93329	Yes	1.55252
10182	3.84763	10.1353	PF01341:Glycoside hydrolase, family 6 ;	GO:0004553-hydrolase activity, hydrolyzing O-glycosyl compounds ; GO:0005975-carbohydrate metabolic process ;	Up	2.33546e-08	2.63417	Yes	1.39735
10283	0.91522	10.1001	PF00171:Aldehyde dehydrogenase ;	GO:0004029-aldehyde dehydrogenase (NAD) activity ;	Up	0	11.0357	Yes	3.46411
10379	1434.86	2903.09			Up	0	2.02326	Yes	1.01668
10420	11.1056	33.8581			Up	0	3.04874	Yes	1.60821
10533	3.75779	12.4494			Up	2.87203e-09	3.31296	Yes	1.72812
10569	61.1712	161.329			Up	0	2.63734	Yes	1.39908
10576	6.68023	20.0071	PF05730:CFEM ;		Up	3.66246e-07	2.99497	Yes	1.58254
10588	13.3306	82.2857			Up	0	6.17269	Yes	2.6259
76	1067.67	510.191	PF06355:Aegerolysin ;	GO:0019836-hemolysis by symbiont of host red blood cells ; GO:0030582-fruiting body development ;	Down	0	0.477855	Yes	-1.06536
77	82.3222	37.704			Down	0	0.458005	Yes	-1.12656
232	656.432	326.135	PF01564:Spermine synthase ;	GO:0003824-catalytic activity ; GO:0003677-DNA binding ; GO:0004766-spermidine synthase activity ;	Down	0	0.49683	Yes	-1.00918
240	94.9032	41.9752		GO:0016787-hydrolase activity ; GO:0008152-metabolic process ;	Down	0	0.442295	Yes	-1.17692
875	55.6063	23.8679	PF00295:Glycoside hydrolase, family 28 ;	GO:0005975-carbohydrate metabolic process ; GO:0047911-galacturan 1,4-alpha-galacturonidase activity ; GO:0004650-polygalacturonase activity ;	Down	0	0.42923	Yes	-1.22018
890	8.26011	4.08968			Down	0.000710402	0.495112	Yes	-1.01417
1231	32.5074	9.86123	PF01384:Phosphate transporter ;	GO:0006817-phosphate transport ; GO:0016020-membrane ; GO:0005315-inorganic phosphate transmembrane transporter activity ;	Down	0	0.303353	Yes	-1.72093
1239	24.3141	11.4756			Down	2.81459e-06	0.471973	Yes	-1.08322
1296	3.10941	1.44208	PF00248:Aldo/keto reductase ;	GO:0043826-sulfur oxygenase reductase activity ; GO:0043738-F420H2 dehydrogenase activity ; GO:0043883-malolactic enzyme activity ; GO:0051341-regulation of oxidoreductase activity ; GO:0016491-oxidoreductase activity ;	Down	0.0496335	0.463779	Yes	-1.10849
1299	40.6385	17.9288			Down	0.0265342	0.441178	Yes	-1.18057
1527	8.30484	3.85224			Down	0.00233966	0.463855	Yes	-1.10825
1545	195.165	95.9314			Down	0	0.49154	Yes	-1.02462
1575	22.0231	7.60928	PF00724:NADH:flavin oxidoreductase/NADH oxidase ;	GO:0003959-NADPH dehydrogenase activity ; GO:0010181-FMN binding ; GO:0016491-oxidoreductase activity ;	Down	0	0.345514	Yes	-1.53319
1735	3.23303	1.44114			Down	0.00420021	0.445755	Yes	-1.16568
1745	5.86542	2.35695			Down	0.0230871	0.401838	Yes	-1.31531
1746	12.777	6.35071	PF00984:UDP-glucose/GDP-mannose dehydrogenase ; PF03721:UDP-glucose/GDP-mannose dehydrogenase ; PF03720:UDP-glucose/GDP-mannose dehydrogenase ;	GO:0016616-oxidoreductase activity, acting on the CH-OH group of donors, NAD or NADP as acceptor ; GO:0051287-NAD binding ; GO:0006118-electron transport ; GO:0003979-UDP-glucose 6-dehydrogenase activity ;	Down	1.70274e-07	0.497042	Yes	-1.00856
2056	17.1054	7.17962			Down	0.0365403	0.419728	Yes	-1.25247
2315	8.73039	4.01926		GO:0003824-catalytic activity ; GO:0008115-sarcosine oxidase activity ;	Down	1.1783e-05	0.460376	Yes	-1.11912
2321	3.8494	1.86035			Down	0.0125501	0.483283	Yes	-1.04906
2412	1.29381	0.460885		GO:0016021-integral to membrane ; GO:0006810-transport ; GO:0005215-transporter activity ;	Down	0.0403966	0.356223	Yes	-1.48915
2442	11.64	4.2077			Down	1.98736e-05	0.361486	Yes	-1.46799
2443	19.2043	8.1329	PF01384:Phosphate transporter ;	GO:0006817-phosphate transport ; GO:0016020-membrane ; GO:0005315-inorganic phosphate transmembrane transporter activity ;	Down	0.0012659	0.423494	Yes	-1.23959
2597	0.821571	0.148281	PF00083:General substrate transporter ;	GO:0016021-integral to membrane ; GO:0016020-membrane ; GO:0005215-transporter activity ; GO:0008643-carbohydrate transport ; GO:0006810-transport ; GO:0005351-sugar:hydrogen symporter activity ; GO:0008733-L-arabinose isomerase activity ;	Down	0.0448168	0.180485	Yes	-2.47005
2661	82.0245	34.1762		GO:0016491-oxidoreductase activity ;	Down	3.19056e-05	0.416658	Yes	-1.26306
2662	95.2627	41.9408		GO:0016491-oxidoreductase activity ;	Down	0.0105089	0.440265	Yes	-1.18356
2663	32.9565	10.4341		GO:0016787-hydrolase activity ; GO:0008152-metabolic process ;	Down	0	0.316602	Yes	-1.65926	0.47
2709	49.9174	24.0404			Down	0.00657156	0.481604	Yes	-1.05408
2745	168.503	73.3385			Down	0	0.435236	Yes	-1.20013
3010	99.4296	45.998		GO:0016831-carboxy-lyase activity ;	Down	0	0.462619	Yes	-1.1121
3012	4961.57	1928.23	PF00857:Isochorismatase hydrolase ;	GO:0003824-catalytic activity ; GO:0008152-metabolic process ;	Down	2.18696e-05	0.388633	Yes	-1.36352
3046	177.802	80.5266		GO:0016021-integral to membrane ; GO:0016020-membrane ; GO:0005215-transporter activity ; GO:0008643-carbohydrate transport ; GO:0006810-transport ; GO:0005351-sugar:hydrogen symporter activity ;	Down	0	0.4529	Yes	-1.14273
3052	215.486	95.44	PF00397:WW/Rsp5/WWP ;	GO:0007186-G-protein coupled receptor protein signaling pathway ; GO:0016021-integral to membrane ; GO:0001584-rhodopsin-like receptor activity ; GO:0005515-protein binding ;	Down	0	0.442906	Yes	-1.17493
3400	273.517	79.2498	PF00107:Zinc-containing alcohol dehydrogenase superfamily ;	GO:0008270-zinc ion binding ; GO:0032440-2-alkenal reductase activity ; GO:0016491-oxidoreductase activity ;	Down	0	0.289744	Yes	-1.78715
3458	11.5608	2.77459	PF02515:L-carnitine dehydratase/bile acid-inducible protein F ;	GO:0003824-catalytic activity ; GO:0008111-alpha-methylacyl-CoA racemase activity ; GO:0008152-metabolic process ;	Down	2.42246e-09	0.24	Yes	-2.05889
3479	13.8135	2.02356	PF00107:Zinc-containing alcohol dehydrogenase superfamily ;	GO:0008106-alcohol dehydrogenase (NADP+) activity ; GO:0008270-zinc ion binding ; GO:0016491-oxidoreductase activity ;	Down	4.61626e-14	0.146491	Yes	-2.77111
3484	75.6363	25.5877			Down	0.000274879	0.338299	Yes	-1.56363
3487	20.8725	10.3036			Down	4.00608e-09	0.493645	Yes	-1.01845
3780	4.88384	2.14944	PF01699:Sodium/calcium exchanger membrane region ;	GO:0016021-integral to membrane ;	Down	2.9564e-06	0.440113	Yes	-1.18406
3789	499.034	83.5403	PF04419:Four F5 protein ;		Down	9.64422e-11	0.167404	Yes	-2.57859
3793	54.3066	21.757			Down	9.05114e-15	0.400633	Yes	-1.31965
3939	9.84771	4.50872			Down	0.0124835	0.457845	Yes	-1.12707
4177	73.5569	35.1142			Down	0	0.477375	Yes	-1.06681
4228	154.874	70.7431			Down	0	0.456778	Yes	-1.13043
4656	24.7543	11.0298		GO:0003824-catalytic activity ; GO:0008152-metabolic process ;	Down	1.41438e-11	0.445571	Yes	-1.16627
4763	63.1347	28.3504			Down	0	0.449046	Yes	-1.15506
4783	31.9059	12.1898	PF01490:Amino acid/polyamine transporter II ;		Down	0	0.382055	Yes	-1.38815
5050	59.1046	27.6288	PF02566:OsmC-like protein ;	GO:0006950-response to stress ; GO:0008152-metabolic process ; GO:0016740-transferase activity ;	Down	5.6948e-10	0.467456	Yes	-1.0971
5152	33.6151	14.2817	PF00175:Oxidoreductase FAD/NAD(P)-binding ; PF01558:Pyruvate ferredoxin/flavodoxin oxidoreductase ; PF00667:FAD-binding ;	GO:0006118-electron transport ; GO:0016491-oxidoreductase activity ;	Down	0	0.42486	Yes	-1.23494
5202	75.7638	7.76772	PF01042:Endoribonuclease L-PSP ;		Down	0	0.102525	Yes	-3.28595
5203	10.4512	3.96549			Down	1.51865e-07	0.379429	Yes	-1.3981
5204	11.5003	3.85311			Down	5.1309e-05	0.335044	Yes	-1.57758
5764	1.41148	0.263551	PF00174:Oxidoreductase, molybdopterin binding ; PF03404:Mo-co oxidoreductase dimerisation domain ;	GO:0008482-sulfite oxidase activity ; GO:0030151-molybdenum ion binding ; GO:0006118-electron transport ; GO:0016491-oxidoreductase activity ;	Down	0.00565777	0.18672	Yes	-2.42105
5842	9.46343	4.40724	PF00230:Major intrinsic protein ;	GO:0006810-transport ; GO:0016020-membrane ; GO:0005215-transporter activity ;	Down	0.000777608	0.465713	Yes	-1.10249
6226	158.834	77.0639	PF00098:Zn-finger, CCHC type ;	GO:0003676-nucleic acid binding ; GO:0008270-zinc ion binding ;	Down	0	0.485185	Yes	-1.04339
6589	13.8355	6.47784			Down	3.85669e-11	0.468204	Yes	-1.09479
6865	8.99376	4.44137			Down	0.000704777	0.493828	Yes	-1.01792
6958	24.8588	11.6892		GO:0008270-zinc ion binding ; GO:0016491-oxidoreductase activity ;	Down	0.000333382	0.470224	Yes	-1.08858
6959	27.8287	13.5988			Down	0.0036182	0.488661	Yes	-1.03309
7085	2.29267	0.790011			Down	0.00477918	0.344581	Yes	-1.53708
7108	32.8618	16.1663	PF00397:WW/Rsp5/WWP ;	GO:0005515-protein binding ;	Down	0.0177987	0.491948	Yes	-1.02342
7145	53.4775	25.195	PF01753:Zn-finger, MYND type ;	GO:0008270-zinc ion binding ;	Down	4.97597e-05	0.471133	Yes	-1.08579
7427	22.7845	11.2367	PF00083:General substrate transporter ;	GO:0016021-integral to membrane ; GO:0016020-membrane ; GO:0005215-transporter activity ; GO:0008643-carbohydrate transport ; GO:0006810-transport ; GO:0005351-sugar:hydrogen symporter activity ; GO:0008733-L-arabinose isomerase activity ;	Down	6.25801e-14	0.493173	Yes	-1.01983
7568	4.47445	2.16868		GO:0006364-rRNA processing ;	Down	0.00340353	0.484681	Yes	-1.04489
7899	29.7094	0.053622	PF00172:Fungal transcriptional regulatory protein, N-terminal ; PF04082:Fungal specific transcription factor ;	GO:0003700-transcription factor activity ; GO:0006350-transcription ; GO:0008270-zinc ion binding ; GO:0003677-DNA binding ; GO:0006355-regulation of transcription, DNA-dependent ; GO:0005634-nucleus ;	Down	5.37735e-12	0.00180488	Yes	-9.11388	0
8009	2.48162	0.907694	PF00230:Major intrinsic protein ;	GO:0006810-transport ; GO:0016020-membrane ; GO:0031072-heat shock protein binding ; GO:0005215-transporter activity ;	Down	0.0074569	0.365767	Yes	-1.451
8095	13.1387	6.25542			Down	1.83e-07	0.476106	Yes	-1.07064
8175	1.53638	0.675297	PF06422:CDR ABC transporter ; PF00005:ABC transporter ;	GO:0016021-integral to membrane ; GO:0006810-transport ; GO:0042626-ATPase activity, coupled to transmembrane movement of substances ; GO:0016887-ATPase activity ; GO:0005524-ATP binding ;	Down	0.00702396	0.439538	Yes	-1.18594
8215	56.6568	8.47794	PF01761:3-dehydroquinate synthase ;	GO:0003856-3-dehydroquinate synthase activity ; GO:0009073-aromatic amino acid family biosynthetic process ;	Down	0	0.149637	Yes	-2.74046
8216	33.9643	10.4063		GO:0016206-catechol O-methyltransferase activity ;	Down	0	0.306389	Yes	-1.70656
8477	8.64419	4.27477	PF05042:Caleosin related ;		Down	0.0226862	0.494525	Yes	-1.01588
8527	16.1838	4.75247	PF00474:Na+/solute symporter ;	GO:0006810-transport ; GO:0016020-membrane ; GO:0005215-transporter activity ;	Down	0	0.293656	Yes	-1.7678
8566	40.8082	18.5993			Down	2.66126e-11	0.455774	Yes	-1.13361
8641	185.05	15.1959	PF00043:Glutathione S-transferase, C-terminal ; PF02798:Glutathione S-transferase, N-terminal ;		Down	0	0.0821178	Yes	-3.60616	0.12
8648	5.38218	2.43502	PF00704:Glycoside hydrolase, family 18 ;	GO:0004812-aminoacyl-tRNA ligase activity ; GO:0004568-chitinase activity ; GO:0016998-cell wall catabolic process ; GO:0005622-intracellular ; GO:0005737-cytoplasm ; GO:0003676-nucleic acid binding ; GO:0006412-translation ; GO:0000166-nucleotide binding ; GO:0008270-zinc ion binding ; GO:0006032-chitin catabolic process ; GO:0004553-hydrolase activity, hydrolyzing O-glycosyl compounds ; GO:0005…	Down	3.33199e-12	0.452423	Yes	-1.14426
8650	17.3771	8.11315			Down	0.000158941	0.466887	Yes	-1.09885
8663	405.477	187.053	PF01124:Membrane-associated proteins in eicosanoid and glutathione metabolism (MAPEG) ;	GO:0004364-glutathione transferase activity ;	Down	0	0.461316	Yes	-1.11617
8720	10.8592	5.22441	PF01184:GPR1/FUN34/yaaH ;	GO:0016020-membrane ;	Down	0.000413906	0.481105	Yes	-1.05558
8996	82.2895	36.8543	PF00245:Alkaline phosphatase ;	GO:0004035-alkaline phosphatase activity ; GO:0008152-metabolic process ;	Down	0	0.447862	Yes	-1.15888
9034	160.683	78.6459	PF06041:Bacterial protein of unknown function DUF924 ;		Down	0	0.489448	Yes	-1.03077
9099	0.993669	0.293812	PF00135:Carboxylesterase, type B ;		Down	0.0393599	0.295684	Yes	-1.75787
9181	143.948	38.5798			Down	6.95812e-13	0.268012	Yes	-1.89963
9226	250.636	72.6618			Down	0	0.28991	Yes	-1.78632
9447	65.7008	31.0029	PF00909:Rh-like protein/ammonium transporter ;	GO:0006810-transport ; GO:0016020-membrane ; GO:0008519-ammonium transmembrane transporter activity ;	Down	0	0.47188	Yes	-1.08351
9632	209.412	32.8422	PF01979:Amidohydrolase ;	GO:0008270-zinc ion binding ; GO:0006508-proteolysis ; GO:0008237-metallopeptidase activity ; GO:0016787-hydrolase activity ;	Down	0	0.156831	Yes	-2.67272
9633	41.5102	13.7828	PF01979:Amidohydrolase ;	GO:0016787-hydrolase activity ;	Down	0	0.332034	Yes	-1.5906
9938	60.958	24.8438			Down	0	0.407556	Yes	-1.29493
10076	6.06441	2.85031		GO:0004871-signal transducer activity ; GO:0007165-signal transduction ;	Down	0.0177948	0.470006	Yes	-1.08925
10093	4.98931	1.57611	PF02714:Protein of unknown function DUF221 ;	GO:0016020-membrane ; GO:0006629-lipid metabolic process ; GO:0016298-lipase activity ;	Down	3.77774e-10	0.315897	Yes	-1.66247
10094	105.965	44.3312			Down	0	0.418357	Yes	-1.25719
10399	15.1302	5.24824			Down	5.50197e-06	0.346872	Yes	-1.52753
10411	110.674	50.8975	PF00083:General substrate transporter ;	GO:0016021-integral to membrane ; GO:0016020-membrane ; GO:0005215-transporter activity ; GO:0008643-carbohydrate transport ; GO:0006810-transport ; GO:0005351-sugar:hydrogen symporter activity ;	Down	0	0.459887	Yes	-1.12065
10492	5.14998	1.52437	PF01184:GPR1/FUN34/yaaH ;	GO:0016020-membrane ;	Down	0.00432319	0.295995	Yes	-1.75635
10571	31.076	13.6255	PF00107:Zinc-containing alcohol dehydrogenase superfamily ;	GO:0008270-zinc ion binding ; GO:0016491-oxidoreductase activity ;	Down	1.53668e-08	0.438457	Yes	-1.18949
qRT-PCR results were calculated by delta delta Ct = [(Ct (gene i)-C t(Ef1-alpha) in Bdtf1 mutant -(Ct (gene i) - Ct (Ef1-alpha)) in wild type.

## Sheet: Table S2
Table S2. Differentially expressed genes during mycelial growth in the presence of brassinin
ProteinId	BrasWt	BrasFtf1	PFAM annotation	GO annotation	BrasWt -> BrasFtf1: Up/Down	BrasWt -> BrasFtf1: q value	ratio (m/w)	BrasWt -> BrasFtf1: >2-fold and significant difference?	log2 ratio	q-RT-PCR
15	12.094	52.3012		GO:0005634-nucleus ;	Up	2.76079e-10	4.32456	Yes	2.11255
135	0.351741	2.39611	PF00004:AAA ATPase, central region ;	GO:0000166-nucleotide binding ; GO:0005524-ATP binding ; GO:0017111-nucleoside-triphosphatase activity ;	Up	5.00222e-05	6.81214	Yes	2.76811
195	50.4079	131.07			Up	0.000530383	2.60019	Yes	1.37862
264	146.315	483.98			Up	1.5714e-05	3.30779	Yes	1.72587
274	47.4078	101.34			Up	0.00408024	2.13762	Yes	1.09601
284	426.355	856.531	PF02560:Cyanate lyase, C-terminal ;	GO:0009439-cyanate metabolic process ; GO:0016836-hydro-lyase activity ; GO:0008152-metabolic process ; GO:0008824-cyanate hydratase activity ;	Up	0.0164674	2.00896	Yes	1.00645
314	571.981	1247.99	PF01408:Oxidoreductase, N-terminal ;	GO:0047115-trans-1,2-dihydrobenzene-1,2-diol dehydrogenase activity ; GO:0016491-oxidoreductase activity ;	Up	0.0305352	2.18187	Yes	1.12557
335	6.0015	13.5254	PF00248:Aldo/keto reductase ;	GO:0004024-alcohol dehydrogenase activity, zinc-dependent ; GO:0004025-alcohol dehydrogenase activity, iron-dependent ; GO:0004023-alcohol dehydrogenase activity, metal ion-independent ; GO:0016491-oxidoreductase activity ; GO:0004022-alcohol dehydrogenase activity ;	Up	0.0129281	2.25367	Yes	1.17228
366	7.55093	100.204			Up	0	13.2704	Yes	3.73014
367	9.81324	38.1957	PF00135:Carboxylesterase, type B ;	GO:0004091-carboxylesterase activity ;	Up	1.87472e-08	3.89226	Yes	1.96061
392	33.4009	67.071			Up	0.0208415	2.00806	Yes	1.0058
431	110.658	249.312			Up	0.00442658	2.253	Yes	1.17184
440	1107.28	9924.17			Up	3.52434e-09	8.96266	Yes	3.16393
441	19.1576	76.9988			Up	3.53586e-06	4.01923	Yes	2.00692
446	183.292	795.211			Up	1.55323e-05	4.33849	Yes	2.11719
447	6.40141	23.1806			Up	6.91291e-07	3.62117	Yes	1.85646
505	8.04796	18.4785	PF00106:Short-chain dehydrogenase/reductase SDR ;	GO:0004316-3-oxoacyl-[acyl-carrier-protein] reductase activity ; GO:0016491-oxidoreductase activity ; GO:0008152-metabolic process ;	Up	0.00835258	2.29605	Yes	1.19915
594	174.609	470.441	PF01679:Protein of unknown function UPF0057 ;	GO:0016021-integral to membrane ;	Up	4.52546e-05	2.69425	Yes	1.42989
632	151.078	339.81	PF06966:Protein of unknown function DUF1295 ;	GO:0016021-integral to membrane ; GO:0005737-cytoplasm ; GO:0006629-lipid metabolic process ; GO:0016627-oxidoreductase activity, acting on the CH-CH group of donors ;	Up	0.00250008	2.24924	Yes	1.16943
633	169.233	424.168	PF01042:Endoribonuclease L-PSP ;		Up	0.000906845	2.50641	Yes	1.32562
638	20.4636	46.2233			Up	0.0181979	2.25881	Yes	1.17556
652	44.8961	163.731			Up	7.59762e-08	3.64689	Yes	1.86667
712	235.411	502.036	PF00702:Haloacid dehalogenase-like hydrolase ;	GO:0003824-catalytic activity ; GO:0016787-hydrolase activity ; GO:0008152-metabolic process ;	Up	0.00568349	2.13259	Yes	1.09261
715	6.60696	21.109			Up	1.55323e-05	3.19496	Yes	1.6758
729	476.328	1199.41			Up	0.000331888	2.51803	Yes	1.3323
745	781.724	2323.9			Up	0.000230055	2.97279	Yes	1.57182
757	224.951	809.768			Up	3.02592e-07	3.59975	Yes	1.8479
765	21.2397	44.0455			Up	0.0191179	2.07373	Yes	1.05223
766	1.46866	3.75902	PF01565:FAD linked oxidase, N-terminal ;	GO:0050660-FAD binding ; GO:0016491-oxidoreductase activity ;	Up	0.0154571	2.55949	Yes	1.35586
771	16.0046	43.98		GO:0000701-purine-specific mismatch base pair DNA N-glycosylase activity ; GO:0017065-single-strand selective uracil DNA N-glycosylase activity ; GO:0019104-DNA N-glycosylase activity ; GO:0043733-DNA-3-methyladenine glycosylase III activity ; GO:0004844-uracil DNA N-glycosylase activity ;	Up	0.000171575	2.74796	Yes	1.45836
772	30.5444	67.4824			Up	0.00353437	2.20932	Yes	1.1436
861	21.5646	43.3826	PF00172:Fungal transcriptional regulatory protein, N-terminal ; PF04082:Fungal specific transcription factor ;	GO:0003700-transcription factor activity ; GO:0006350-transcription ; GO:0008270-zinc ion binding ; GO:0003677-DNA binding ; GO:0006355-regulation of transcription, DNA-dependent ; GO:0005634-nucleus ;	Up	0.0103715	2.01175	Yes	1.00845
868	17.4632	38.1893	PF04616:Glycoside hydrolase, family 43 ;	GO:0004553-hydrolase activity, hydrolyzing O-glycosyl compounds ; GO:0005975-carbohydrate metabolic process ;	Up	0.00364066	2.18684	Yes	1.12885
896	12.8846	26.771		GO:0008270-zinc ion binding ; GO:0005515-protein binding ;	Up	0.00528027	2.07775	Yes	1.05502
902	841.8	2149.13			Up	0.000243877	2.55302	Yes	1.3522
923	28.581	62.5783			Up	0.00516674	2.18951	Yes	1.13061
973	22.0139	44.8371			Up	0.0307163	2.03676	Yes	1.02628
1089	29.6134	81.2108	PF00097:Zn-finger, RING ;	GO:0008270-zinc ion binding ; GO:0005515-protein binding ;	Up	5.37691e-05	2.74237	Yes	1.45542
1114	51.1062	116.114	PF00722:Glycoside hydrolase, family 16 ;	GO:0004553-hydrolase activity, hydrolyzing O-glycosyl compounds ; GO:0005975-carbohydrate metabolic process ; GO:0042972-licheninase activity ;	Up	0.00126508	2.27201	Yes	1.18397
1161	14.3178	68.2185			Up	7.65023e-05	4.76459	Yes	2.25235
1165	71.3622	147.408			Up	0.00938551	2.06563	Yes	1.04658
1209	135.516	416.537	PF00043:Glutathione S-transferase, C-terminal ;		Up	3.29539e-06	3.07371	Yes	1.61998
1239	13.0686	39.2635			Up	0.000102458	3.00442	Yes	1.58708
1284	102.138	247.775			Up	0.00252755	2.42588	Yes	1.27851
1311	3.74827	10.2144		GO:0016021-integral to membrane ; GO:0006810-transport ; GO:0005215-transporter activity ;	Up	0.000713793	2.7251	Yes	1.44631
1324	291.795	905.896			Up	2.03984e-06	3.10456	Yes	1.63439
1330	7.6441	15.3889	PF06792:Protein of unknown function UPF0261 ;		Up	0.0252732	2.01317	Yes	1.00947
1349	2.79299	6.10332			Up	0.0338394	2.18523	Yes	1.12778
1405	6.30707	61.2663	PF06422:CDR ABC transporter ; PF00005:ABC transporter ;	GO:0016021-integral to membrane ; GO:0042626-ATPase activity, coupled to transmembrane movement of substances ; GO:0017111-nucleoside-triphosphatase activity ; GO:0006810-transport ; GO:0000166-nucleotide binding ; GO:0016887-ATPase activity ; GO:0005524-ATP binding ;	Up	0	9.71391	Yes	3.28005
1448	90.2639	203.324			Up	0.00248111	2.25255	Yes	1.17156
1462	138.35	299.944	PF00071:Ras GTPase ;	GO:0007264-small GTPase mediated signal transduction ; GO:0006886-intracellular protein transport ; GO:0005515-protein binding ; GO:0003924-GTPase activity ; GO:0007165-signal transduction ; GO:0006913-nucleocytoplasmic transport ; GO:0005525-GTP binding ; GO:0005622-intracellular ; GO:0015031-protein transport ;	Up	0.00408024	2.16801	Yes	1.11637
1595	25.323	52.7597			Up	0.00612839	2.08347	Yes	1.05899
1631	567.303	1560.42			Up	0.000198564	2.75059	Yes	1.45974
1635	87.6759	186.064	PF00135:Carboxylesterase, type B ;	GO:0004091-carboxylesterase activity ;	Up	0.00794663	2.12218	Yes	1.08555
1653	17.5518	36.2207	PF00249:Myb, DNA-binding ; PF00569:Zn-finger, ZZ type ; PF04433:SWIRM ;	GO:0003677-DNA binding ; GO:0008270-zinc ion binding ;	Up	0.00742758	2.06365	Yes	1.0452
1656	2.69771	8.17959	PF01204:Glycoside hydrolase, family 37 ;	GO:0004555-alpha,alpha-trehalase activity ; GO:0005991-trehalose metabolic process ;	Up	0.000113726	3.03205	Yes	1.60029
1660	6.23029	18.918		GO:0003824-catalytic activity ; GO:0008152-metabolic process ;	Up	1.87945e-05	3.03646	Yes	1.60239
1662	7.97255	21.4455			Up	0.00234716	2.68992	Yes	1.42756
1687	3.05478	7.56126	PF00106:Short-chain dehydrogenase/reductase SDR ;	GO:0050356-tropine dehydrogenase activity ; GO:0016491-oxidoreductase activity ; GO:0008152-metabolic process ;	Up	0.0228509	2.47522	Yes	1.30756
1688	3.96885	9.7357			Up	0.013078	2.45303	Yes	1.29456
1695	25.4776	58.8566	PF02716:Isoflavone reductase ;		Up	0.00201747	2.31013	Yes	1.20797
1699	45.3571	95.2548			Up	0.0106179	2.10011	Yes	1.07046
1708	14.2215	68.4692			Up	6.18833e-08	4.81449	Yes	2.26738
1709	0.651441	3.61962		GO:0003700-transcription factor activity ; GO:0046983-protein dimerization activity ; GO:0043565-sequence-specific DNA binding ; GO:0006355-regulation of transcription, DNA-dependent ; GO:0005634-nucleus ;	Up	0.0218045	5.55633	Yes	2.47413
1711	10.1384	22.5846			Up	0.0121918	2.22763	Yes	1.15551
1733	12.1598	278.182			Up	0	22.8772	Yes	4.51584
1743	50.3164	127.772			Up	0.000236944	2.53937	Yes	1.34447
1749	143.619	294.877	PF00957:Synaptobrevin ;	GO:0016021-integral to membrane ; GO:0016192-vesicle-mediated transport ;	Up	0.00942353	2.05319	Yes	1.03787
1829	1447.95	3089.03	PF00887:Acyl-coA-binding protein, ACBP ;	GO:0000062-acyl-CoA binding ;	Up	0.0148726	2.13338	Yes	1.09314
1931	154.326	543.422			Up	4.71273e-07	3.52126	Yes	1.81609
1933	71.5751	204.782			Up	5.02424e-05	2.86108	Yes	1.51656
1960	26.8434	55.3769	PF03109:ABC-1 ;		Up	0.00569847	2.06296	Yes	1.04472
1961	36.3573	151.307	PF07646:Kelch ; PF01344:Kelch repeat ;		Up	4.01474e-09	4.16167	Yes	2.05716
1985	31.2002	64.1461			Up	0.0369402	2.05595	Yes	1.03981
1995	5.06197	15.0832			Up	4.35431e-05	2.97971	Yes	1.57517
2014	10.4528	31.0114	PF01243:Pyridoxamine 5'-phosphate oxidase-related ; PF00612:IQ calmodulin-binding region ;	GO:0010181-FMN binding ;	Up	6.59437e-06	2.9668	Yes	1.56891
2019	17.2082	52.8331	PF00251:Glycoside hydrolase, family 32 ;	GO:0004564-beta-fructofuranosidase activity ; GO:0004553-hydrolase activity, hydrolyzing O-glycosyl compounds ; GO:0005975-carbohydrate metabolic process ;	Up	3.58231e-06	3.07023	Yes	1.61835
2056	35.8073	86.9563			Up	0.00902654	2.42845	Yes	1.28004
2145	0.472719	66.8781	PF01965:ThiJ/PfpI ;		Up	0	141.475	Yes	7.14441
2153	37.3701	80.3268		GO:0008115-sarcosine oxidase activity ;	Up	0.00327486	2.14949	Yes	1.104
2155	21.1593	48.734			Up	0.00225944	2.3032	Yes	1.20364
2212	134.181	308.465			Up	0.00227939	2.29887	Yes	1.20093
2285	111.728	256.582	PF05254:Protein of unknown function UPF0203 ;		Up	0.00613797	2.29649	Yes	1.19943
2291	3.86712	8.92201			Up	0.0157998	2.30715	Yes	1.20611
2308	83.0568	310.403			Up	1.43234e-06	3.73724	Yes	1.90197
2382	17.4334	42.4479			Up	0.0319317	2.43486	Yes	1.28384
2409	16.0985	44.9355			Up	0.00233016	2.79128	Yes	1.48093
2427	69.8277	175.305			Up	0.000205088	2.51054	Yes	1.328
2435	2.27902	7.56178	PF06422:CDR ABC transporter ; PF00005:ABC transporter ;	GO:0016021-integral to membrane ; GO:0042626-ATPase activity, coupled to transmembrane movement of substances ; GO:0017111-nucleoside-triphosphatase activity ; GO:0006810-transport ; GO:0000166-nucleotide binding ; GO:0016887-ATPase activity ; GO:0005524-ATP binding ;	Up	4.24289e-06	3.318	Yes	1.73031
2440	20.4165	41.9262	PF00295:Glycoside hydrolase, family 28 ;	GO:0005975-carbohydrate metabolic process ; GO:0004650-polygalacturonase activity ;	Up	0.0102329	2.05354	Yes	1.03812
2513	39.5868	121.599			Up	1.014e-05	3.07171	Yes	1.61904
2584	22.9773	68.4537			Up	7.51988e-06	2.97919	Yes	1.57492
2587	1.38914	4.99938	PF00657:Lipolytic enzyme, G-D-S-L ;	GO:0016788-hydrolase activity, acting on ester bonds ; GO:0006629-lipid metabolic process ;	Up	0.0058555	3.5989	Yes	1.84756
2610	98.8331	241.601			Up	0.000325825	2.44454	Yes	1.28956
2624	4.39837	8.85526			Up	0.0432341	2.0133	Yes	1.00957
2632	6.38647	25.8098	PF06985:Heterokaryon incompatibility ;		Up	1.41216e-06	4.04132	Yes	2.01483
2637	10.7693	25.588			Up	0.0204888	2.37601	Yes	1.24854
2656	16.8177	48.8967			Up	0.000468882	2.90745	Yes	1.53976
2757	429.537	875.576	PF00226:Heat shock protein DnaJ, N-terminal ;	GO:0006457-protein folding ; GO:0031072-heat shock protein binding ; GO:0051082-unfolded protein binding ;	Up	0.0156706	2.03842	Yes	1.02745
2795	5.46192	12.4828	PF06966:Protein of unknown function DUF1295 ;	GO:0016021-integral to membrane ; GO:0005737-cytoplasm ; GO:0006629-lipid metabolic process ; GO:0016627-oxidoreductase activity, acting on the CH-CH group of donors ;	Up	0.00990394	2.28542	Yes	1.19246
2848	31.5373	84.3434	PF00096:Zn-finger, C2H2 type ;	GO:0008270-zinc ion binding ; GO:0003676-nucleic acid binding ; GO:0005622-intracellular ;	Up	0.000459476	2.6744	Yes	1.41922
2854	30.7704	65.0723			Up	0.00381933	2.11477	Yes	1.0805
2855	40.8262	105.275	PF02987:Late embryogenesis abundant protein ;	GO:0003910-DNA ligase (ATP) activity ;	Up	0.000635431	2.57861	Yes	1.3666
2856	49.5411	164.164			Up	7.69017e-07	3.31369	Yes	1.72844
2868	532.35	1277.73	PF03647:Protein of unknown function UPF0136 ;	GO:0016020-membrane ;	Up	0.00130894	2.40017	Yes	1.26314
2889	25.738	93.8372		GO:0016068-type I hypersensitivity ;	Up	7.41153e-07	3.64586	Yes	1.86626
2899	127.417	257.838			Up	0.00909738	2.02358	Yes	1.01691
2918	22.3696	56.3018		GO:0004316-3-oxoacyl-[acyl-carrier-protein] reductase activity ; GO:0016491-oxidoreductase activity ; GO:0008152-metabolic process ;	Up	0.000550378	2.51689	Yes	1.33164
2923	52.5491	257.647			Up	1.46661e-09	4.90298	Yes	2.29366
2933	54.9549	143.695			Up	9.83149e-05	2.61478	Yes	1.38669
3002	6.74893	14.0977	PF00293:NUDIX hydrolase ;	GO:0016787-hydrolase activity ;	Up	0.0207125	2.08888	Yes	1.06273
3010	26.5831	54.0534		GO:0016831-carboxy-lyase activity ;	Up	0.0186106	2.03337	Yes	1.02388
3012	117.21	289.951	PF00857:Isochorismatase hydrolase ;	GO:0003824-catalytic activity ; GO:0008152-metabolic process ;	Up	0.000456034	2.47377	Yes	1.30671
3063	1.37684	3.32968	PF01055:Glycoside hydrolase, family 31 ;	GO:0004553-hydrolase activity, hydrolyzing O-glycosyl compounds ; GO:0005975-carbohydrate metabolic process ;	Up	0.0100917	2.41835	Yes	1.27402
3112	3.72156	7.76544	PF00096:Zn-finger, C2H2 type ;	GO:0008270-zinc ion binding ; GO:0003676-nucleic acid binding ; GO:0005622-intracellular ;	Up	0.0155429	2.08661	Yes	1.06116
3121	141.278	440.179			Up	0.000292949	3.11569	Yes	1.63955
3131	2.09979	578.182		GO:0006118-electron transport ; GO:0004497-monooxygenase activity ; GO:0020037-heme binding ; GO:0005506-iron ion binding ;	Up	0	275.352	Yes	8.10513
3258	37.1827	78.1117			Up	0.00542915	2.10075	Yes	1.07091
3261	15.4154	35.085		GO:0003676-nucleic acid binding ; GO:0004806-triacylglycerol lipase activity ;	Up	0.00379578	2.27597	Yes	1.18648
3324	18.723	64.4381			Up	1.51463e-06	3.44165	Yes	1.7831
3330	913.052	4837.37		GO:0051438-regulation of ubiquitin-protein ligase activity ; GO:0051444-negative regulation of ubiquitin-protein ligase activity ; GO:0051440-regulation of ubiquitin-protein ligase activity during meiotic cell cycle ; GO:0051443-positive regulation of ubiquitin-protein ligase activity ; GO:0004842-ubiquitin-protein ligase activity ;	Up	0.00132698	5.29802	Yes	2.40545
3344	225.26	569.616	PF00704:Glycoside hydrolase, family 18 ;	GO:0004568-chitinase activity ; GO:0003824-catalytic activity ; GO:0008843-endochitinase activity ; GO:0008152-metabolic process ; GO:0006032-chitin catabolic process ; GO:0004553-hydrolase activity, hydrolyzing O-glycosyl compounds ; GO:0005975-carbohydrate metabolic process ;	Up	0.00125121	2.5287	Yes	1.3384
3368	70.9836	143.98	PF01256:Protein of unknown function UPF0031 ;		Up	0.00826919	2.02836	Yes	1.02031
3382	48.0131	108.967			Up	0.00195113	2.26953	Yes	1.18239
3387	65.5927	150.39	PF00795:Nitrilase/cyanide hydratase and apolipoprotein N-acyltransferase ;	GO:0006807-nitrogen compound metabolic process ; GO:0016810-hydrolase activity, acting on carbon-nitrogen (but not peptide) bonds ;	Up	0.00135345	2.29279	Yes	1.1971
3427	65.4807	165.054			Up	0.000325825	2.52065	Yes	1.3338
3449	41.4035	104.805	PF00067:Cytochrome P450 ;	GO:0018588-tri-n-butyltin dioxygenase activity ; GO:0018589-di-n-butyltin dioxygenase activity ; GO:0018592-4-nitrocatechol 4-monooxygenase activity ; GO:0018598-hydroxymethylsilanetriol oxidase activity ; GO:0018597-ammonia monooxygenase activity ; GO:0018591-methyl tertiary butyl ether 3-monooxygenase activity ; GO:0043823-spheroidene monooxygenase activity ; GO:0018585-fluorene oxygenase activ…	Up	0.00015389	2.53131	Yes	1.33988
3477	21.9969	45.1673	PF00083:General substrate transporter ;	GO:0016021-integral to membrane ; GO:0016020-membrane ; GO:0005215-transporter activity ; GO:0008643-carbohydrate transport ; GO:0006810-transport ; GO:0005351-sugar:hydrogen symporter activity ;	Up	0.0118531	2.05335	Yes	1.03798
3478	20.4671	44.9966		GO:0016021-integral to membrane ; GO:0016020-membrane ; GO:0005215-transporter activity ; GO:0008643-carbohydrate transport ; GO:0006810-transport ; GO:0005351-sugar:hydrogen symporter activity ;	Up	0.00441109	2.19848	Yes	1.13651
3509	17.4855	61.3291		GO:0019538-protein metabolic process ; GO:0016706-oxidoreductase activity, acting on paired donors, with incorporation or reduction of molecular oxygen, 2-oxoglutarate as one donor, and incorporation of one atom each of oxygen into both donors ;	Up	9.57092e-07	3.50743	Yes	1.81041
3527	8.58077	20.8754	PF06985:Heterokaryon incompatibility ; PF00069:Protein kinase ;	GO:0004713-protein-tyrosine kinase activity ; GO:0003676-nucleic acid binding ; GO:0008270-zinc ion binding ; GO:0004674-protein serine/threonine kinase activity ; GO:0004672-protein kinase activity ; GO:0006468-protein amino acid phosphorylation ; GO:0005622-intracellular ; GO:0005524-ATP binding ;	Up	0.000500323	2.43281	Yes	1.28262
3533	16.9362	40.6633			Up	0.00568349	2.40097	Yes	1.26362
3576	3.78826	20.4945			Up	0.00110466	5.41	Yes	2.43563
3596	1297.93	3260.75			Up	0.00307637	2.51227	Yes	1.32899
3656	112.98	292.351			Up	0.000154586	2.58763	Yes	1.37163
3676	78.7644	159.589		GO:0005515-protein binding ;	Up	0.0123138	2.02616	Yes	1.01875
3693	42.0606	84.2616			Up	0.0169421	2.00334	Yes	1.00241
3789	480.23	1109.15	PF04419:Four F5 protein ;		Up	0.0151799	2.30962	Yes	1.20766
3803	1119.21	2663.21			Up	0.00751579	2.37954	Yes	1.25069
3862	15.1336	34.1339			Up	0.00152141	2.2555	Yes	1.17345
3879	13.794	41.3174	PF00248:Aldo/keto reductase ;	GO:0005488-binding ; GO:0050236-pyridoxine 4-dehydrogenase activity ; GO:0016491-oxidoreductase activity ;	Up	2.98914e-05	2.99532	Yes	1.58271
3939	93.5968	283.652			Up	7.63693e-06	3.03057	Yes	1.59959
3944	230.698	567.263			Up	0.000468386	2.4589	Yes	1.29801
3949	133.032	463.351			Up	3.39567e-07	3.483	Yes	1.80033
4202	7.53337	23.1969	PF00026:Peptidase A1, pepsin ;	GO:0004194-pepsin A activity ; GO:0004190-aspartic-type endopeptidase activity ; GO:0006508-proteolysis ; GO:0004196-saccharopepsin activity ;	Up	2.62183e-05	3.07922	Yes	1.62256
4228	9.47021	21.2183			Up	0.047174	2.24053	Yes	1.16384
4279	51.9903	104.704	PF04828:Glutathione-dependent formaldehyde-activating, GFA ;	GO:0016846-carbon-sulfur lyase activity ; GO:0008152-metabolic process ;	Up	0.0308943	2.01391	Yes	1.01
4305	10.5116	1244.02			Up	0	118.347	Yes	6.88688
4306	6.47136	14.9838			Up	0.019303	2.3154	Yes	1.21126
4310	6.76028	17.2617			Up	0.00211226	2.5534	Yes	1.35242
4339	19.6718	39.8128	PF04791:LMBR1-like conserved region ;	GO:0003676-nucleic acid binding ;	Up	0.0082144	2.02385	Yes	1.0171
4350	51.8201	144.111			Up	0.000102765	2.78099	Yes	1.4756
4365	345.585	792.249			Up	0.0018792	2.29249	Yes	1.19691
4377	78.4714	165.915			Up	0.0100722	2.11434	Yes	1.08021
4393	66.6251	234.872			Up	1.24145e-07	3.52528	Yes	1.81774
4420	22.9676	54.8463	PF01571:Glycine cleavage T protein (aminomethyl transferase) ; PF00753:Beta-lactamase-like ;	GO:0006546-glycine catabolic process ; GO:0004047-aminomethyltransferase activity ; GO:0005737-cytoplasm ; GO:0003824-catalytic activity ; GO:0016787-hydrolase activity ; GO:0047865-dimethylglycine dehydrogenase activity ;	Up	0.000511332	2.38799	Yes	1.25579
4446	27.6008	134.88			Up	1.99767e-11	4.88681	Yes	2.28889
4552	4.84354	12.5454			Up	0.0155265	2.59013	Yes	1.37302
4578	10.1356	25.6338	PF01979:Amidohydrolase ;	GO:0016787-hydrolase activity ;	Up	0.000357841	2.52909	Yes	1.33862
4658	7.72716	15.5885			Up	0.0289926	2.01736	Yes	1.01247
4663	5.58144	16.5758			Up	0.011768	2.96981	Yes	1.57037
4685	552.662	1256.44	PF02777:Manganese and iron superoxide dismutase ; PF00081:Manganese and iron superoxide dismutase ;	GO:0006801-superoxide metabolic process ; GO:0046872-metal ion binding ; GO:0004784-superoxide dismutase activity ;	Up	0.00814168	2.27343	Yes	1.18487
4746	16.9687	43.5167	PF02798:Glutathione S-transferase, N-terminal ;		Up	0.00056973	2.56453	Yes	1.35869
4768	3.16081	11.6532	PF06966:Protein of unknown function DUF1295 ;	GO:0016021-integral to membrane ; GO:0005737-cytoplasm ; GO:0006629-lipid metabolic process ; GO:0016627-oxidoreductase activity, acting on the CH-CH group of donors ;	Up	0.000199873	3.68678	Yes	1.88236
4771	10.6117	30.6232			Up	0.00069193	2.8858	Yes	1.52897
4862	11.3904	52.5479			Up	4.71273e-07	4.61335	Yes	2.20581
4872	9.22856	22.3264	PF00795:Nitrilase/cyanide hydratase and apolipoprotein N-acyltransferase ;	GO:0006807-nitrogen compound metabolic process ; GO:0016810-hydrolase activity, acting on carbon-nitrogen (but not peptide) bonds ;	Up	0.00348262	2.41927	Yes	1.27457
4886	18.3842	58.8184			Up	0.00133887	3.1994	Yes	1.6778
4900	1.53867	4.44146	PF00135:Carboxylesterase, type B ;	GO:0004104-cholinesterase activity ;	Up	0.00133206	2.88656	Yes	1.52935
4925	41.024	235.339	PF06422:CDR ABC transporter ; PF00005:ABC transporter ;	GO:0016021-integral to membrane ; GO:0042626-ATPase activity, coupled to transmembrane movement of substances ; GO:0017111-nucleoside-triphosphatase activity ; GO:0006810-transport ; GO:0000166-nucleotide binding ; GO:0016887-ATPase activity ; GO:0005524-ATP binding ;	Up	9.29807e-06	5.73662	Yes	2.5202
4964	14.8618	79.7366	PF00106:Short-chain dehydrogenase/reductase SDR ;	GO:0016491-oxidoreductase activity ; GO:0008152-metabolic process ;	Up	5.17096e-10	5.3652	Yes	2.42363
4965	14.8225	45.562	PF01425:Amidase ;	GO:0004812-aminoacyl-tRNA ligase activity ; GO:0005737-cytoplasm ; GO:0006412-translation ; GO:0000166-nucleotide binding ; GO:0016884-carbon-nitrogen ligase activity, with glutamine as amido-N-donor ; GO:0006418-tRNA aminoacylation for protein translation ; GO:0005524-ATP binding ;	Up	5.58099e-06	3.07384	Yes	1.62004
4967	28.9073	126.845	PF01522:Polysaccharide deacetylase ;	GO:0005975-carbohydrate metabolic process ; GO:0016810-hydrolase activity, acting on carbon-nitrogen (but not peptide) bonds ;	Up	5.28403e-09	4.38799	Yes	2.13356
4968	2.32793	8.71879	PF01490:Amino acid/polyamine transporter II ;		Up	2.74636e-05	3.7453	Yes	1.90508
4995	15.2317	43.0393			Up	5.40758e-05	2.82564	Yes	1.49858
4996	39.6422	96.5811	PF01255:Di-trans-poly-cis-decaprenylcistransferase ;	GO:0008152-metabolic process ; GO:0016740-transferase activity ;	Up	0.000346484	2.43632	Yes	1.2847
5025	1.10267	5.07101	PF00179:Ubiquitin-conjugating enzymes ;	GO:0051246-regulation of protein metabolic process ; GO:0043687-post-translational protein modification ; GO:0019787-small conjugating protein ligase activity ;	Up	9.17804e-07	4.59885	Yes	2.20127
5061	27.5248	659.812			Up	0	23.9715	Yes	4.58325
5123	15.9532	36.845	PF01753:Zn-finger, MYND type ;	GO:0008270-zinc ion binding ;	Up	0.021713	2.30957	Yes	1.20762
5128	8.56852	32.061	PF00141:Haem peroxidase, plant/fungal/bacterial ;	GO:0006979-response to oxidative stress ; GO:0004601-peroxidase activity ; GO:0006118-electron transport ; GO:0020037-heme binding ;	Up	1.63099e-07	3.74172	Yes	1.9037
5147	122.173	362.395			Up	5.00222e-05	2.96624	Yes	1.56864
5148	83.9019	213.496			Up	0.000387218	2.54459	Yes	1.34743
5193	6.03826	79.0277	PF04479:RTA1 like protein ;	GO:0006950-response to stress ; GO:0016021-integral to membrane ;	Up	0	13.0878	Yes	3.71015
5213	2.86078	6.91744		GO:0006118-electron transport ; GO:0004497-monooxygenase activity ; GO:0020037-heme binding ; GO:0005506-iron ion binding ;	Up	0.00786047	2.41803	Yes	1.27383
5238	9.21703	19.4928	PF00106:Short-chain dehydrogenase/reductase SDR ;	GO:0004316-3-oxoacyl-[acyl-carrier-protein] reductase activity ; GO:0016491-oxidoreductase activity ; GO:0008152-metabolic process ;	Up	0.0164893	2.11487	Yes	1.08057
5253	2.0134	7.36297			Up	0.00702563	3.65698	Yes	1.87065
5254	444.487	1969.04			Up	2.74376e-07	4.42992	Yes	2.14728
5256	60.1834	127.265	PF07653:Variant SH3 ; PF00018:SH3 ; PF04366:Protein of unknown function DUF500 ;		Up	0.00376281	2.11462	Yes	1.0804
5317	19.627	43.2966			Up	0.00417698	2.20597	Yes	1.14141
5324	10.4732	28.1306	PF00644:Poly(ADP-ribose) polymerase, catalytic region ; PF05406:WGR ; PF02877:Poly(ADP-ribose) polymerase, regulatory region ;	GO:0006471-protein amino acid ADP-ribosylation ; GO:0005634-nucleus ; GO:0003950-NAD+ ADP-ribosyltransferase activity ;	Up	0.000201792	2.68596	Yes	1.42544
5364	18.2888	40.0788			Up	0.0038067	2.19144	Yes	1.13188
5406	160.246	479.226			Up	4.3735e-06	2.99056	Yes	1.58042
5421	3.28771	7.13926			Up	0.0463716	2.1715	Yes	1.11869
5430	10.1364	22.2757			Up	0.011906	2.19759	Yes	1.13593
5433	111.213	413.431	PF01476:Peptidoglycan-binding LysM ;	GO:0016998-cell wall catabolic process ;	Up	1.91961e-07	3.71747	Yes	1.89432
5453	385.658	795.697			Up	0.0089218	2.06322	Yes	1.0449
5463	25.4591	61.2575			Up	0.000651134	2.40611	Yes	1.26671
5466	0.981878	6.74928			Up	0.0064487	6.87385	Yes	2.78112
5493	103.931	225.068			Up	0.00533468	2.16555	Yes	1.11473
5494	134.879	300.316			Up	0.00148606	2.22656	Yes	1.15482
5507	45.7265	159.141	PF01565:FAD linked oxidase, N-terminal ; PF00187:Chitin-binding, type 1 ;	GO:0050660-FAD binding ; GO:0008061-chitin binding ; GO:0016491-oxidoreductase activity ;	Up	9.66068e-07	3.48028	Yes	1.7992
5508	3.10034	12.1088	PF01966:Metal-dependent phosphohydrolase, HD subdomain ;	GO:0003824-catalytic activity ;	Up	4.31363e-05	3.90564	Yes	1.96556
5513	16.6476	54.2651			Up	5.16133e-05	3.25964	Yes	1.70471
5555	7.15729	27.1933			Up	1.80933e-06	3.79938	Yes	1.92577
5612	389.371	1329.73			Up	4.27609e-05	3.41507	Yes	1.77192
5623	8.79033	27.7423		GO:0016787-hydrolase activity ; GO:0008152-metabolic process ;	Up	0.000579784	3.156	Yes	1.6581
5722	29.0226	74.1311			Up	0.000196934	2.55425	Yes	1.3529
5735	57.7983	199.87			Up	1.28926e-07	3.45806	Yes	1.78996
5741	10.6164	30.6681		GO:0005634-nucleus ;	Up	2.52658e-05	2.88875	Yes	1.53044
5789	1.58447	15.3677	PF00249:Myb, DNA-binding ;	GO:0003677-DNA binding ;	Up	1.28857e-10	9.69895	Yes	3.27783
5792	32.4813	147.495	PF00664:ABC transporter, transmembrane region ; PF00005:ABC transporter ;	GO:0016021-integral to membrane ; GO:0042626-ATPase activity, coupled to transmembrane movement of substances ; GO:0017111-nucleoside-triphosphatase activity ; GO:0006810-transport ; GO:0000166-nucleotide binding ; GO:0016887-ATPase activity ; GO:0005524-ATP binding ;	Up	1.91961e-07	4.54092	Yes	2.18298
5846	36.4396	109.687			Up	9.5439e-06	3.0101	Yes	1.58981
5916	9.73818	19.5318			Up	0.0257954	2.00569	Yes	1.0041
5920	1522.22	4377.93			Up	0.00034477	2.87602	Yes	1.52407
5938	58.751	118.65	PF00026:Peptidase A1, pepsin ;	GO:0004194-pepsin A activity ; GO:0004190-aspartic-type endopeptidase activity ; GO:0006508-proteolysis ;	Up	0.00702563	2.01954	Yes	1.01403
5987	6.19655	16.0815			Up	0.00086989	2.59523	Yes	1.37586
6001	6.54617	22.4746		GO:0016021-integral to membrane ; GO:0006810-transport ; GO:0005215-transporter activity ;	Up	2.60756e-06	3.43324	Yes	1.77957
6057	1.80857	6.67734			Up	0.0114817	3.69206	Yes	1.88442
6060	25.5364	90.2928			Up	3.09984e-07	3.53585	Yes	1.82206
6064	2.93144	6.90821		GO:0016021-integral to membrane ; GO:0006810-transport ; GO:0005215-transporter activity ;	Up	0.00986584	2.35659	Yes	1.2367
6102	26.2385	57.9406			Up	0.00470941	2.20823	Yes	1.14289
6157	38.2146	122.962		GO:0004812-aminoacyl-tRNA ligase activity ; GO:0006508-proteolysis ; GO:0006464-protein modification process ; GO:0005737-cytoplasm ; GO:0006412-translation ; GO:0000166-nucleotide binding ; GO:0008237-metallopeptidase activity ; GO:0008270-zinc ion binding ; GO:0006418-tRNA aminoacylation for protein translation ; GO:0005524-ATP binding ;	Up	1.41216e-06	3.21767	Yes	1.68602
6194	209.197	577.574			Up	6.55184e-05	2.76091	Yes	1.46514
6235	36.3678	79.9173	PF00106:Short-chain dehydrogenase/reductase SDR ;	GO:0003858-3-hydroxybutyrate dehydrogenase activity ; GO:0016491-oxidoreductase activity ; GO:0008152-metabolic process ;	Up	0.00603599	2.19747	Yes	1.13585
6295	3.37559	8.64106	PF00561:Alpha/beta hydrolase fold ;	GO:0003824-catalytic activity ; GO:0004301-epoxide hydrolase activity ;	Up	0.00494249	2.55987	Yes	1.35607
6304	23.2129	67.8483			Up	0.000102765	2.92287	Yes	1.54739
6313	2000.15	4985.56	PF07249:Cerato-platanin ;		Up	0.00902881	2.49259	Yes	1.31765
6321	3.09949	7.5855	PF00561:Alpha/beta hydrolase fold ;	GO:0003824-catalytic activity ;	Up	0.018908	2.44734	Yes	1.29121
6352	12.9686	26.8843	PF03417:Peptidase C45, acyl-coenzyme A:6-aminopenicillanic acid acyl-transferase ;	GO:0042318-penicillin biosynthetic process ;	Up	0.0163592	2.07303	Yes	1.05174
6353	46.2329	197.954	PF00153:Mitochondrial substrate carrier ;	GO:0005488-binding ; GO:0016020-membrane ; GO:0006810-transport ;	Up	1.0749e-08	4.28167	Yes	2.09817
6359	32.6919	109.694	PF03746:LamB/YcsF ;		Up	1.38873e-06	3.35539	Yes	1.74648
6360	5.22933	14.9409	PF02786:Carbamoyl-phosphate synthase L chain, ATP-binding ; PF00289:Carbamoyl-phosphate synthetase large chain, N-terminal ; PF02626:Urea amidolyase-related ; PF02785:Biotin carboxylase, C-terminal ; PF02682:Protein of unknown function DUF213 ;	GO:0003824-catalytic activity ; GO:0016874-ligase activity ; GO:0008152-metabolic process ; GO:0005524-ATP binding ;	Up	3.21585e-05	2.85713	Yes	1.51457
6396	1.5881	4.40974			Up	0.0297924	2.77674	Yes	1.47339
6428	2.06428	6.63252	PF00457:Glycoside hydrolase, family 11 ;	GO:0004553-hydrolase activity, hydrolyzing O-glycosyl compounds ; GO:0005975-carbohydrate metabolic process ;	Up	0.00944033	3.21299	Yes	1.68392
6439	10.1308	66.5241			Up	2.33e-12	6.56652	Yes	2.71513
6481	37.8241	93.4118	PF00578:Alkyl hydroperoxide reductase/ Thiol specific antioxidant/ Mal allergen ;	GO:0051920-peroxiredoxin activity ; GO:0016491-oxidoreductase activity ; GO:0016209-antioxidant activity ;	Up	0.000468386	2.46964	Yes	1.3043
6495	38.6075	102.876	PF00441:Acyl-CoA dehydrogenase, C-terminal ; PF00173:Cytochrome b5 ; PF02770:Acyl-CoA dehydrogenase, central region ;	GO:0003995-acyl-CoA dehydrogenase activity ; GO:0016937-short-branched-chain-acyl-CoA dehydrogenase activity ; GO:0016627-oxidoreductase activity, acting on the CH-CH group of donors ; GO:0046914-transition metal ion binding ; GO:0019109-acyl-CoA reductase activity ; GO:0043820-propionyl-CoA dehydrogenase activity ; GO:0017099-very-long-chain-acyl-CoA dehydrogenase activity ; GO:0043830-thiol-dri…	Up	6.18191e-05	2.66466	Yes	1.41395
6496	11.0261	26.8597			Up	0.0226509	2.43601	Yes	1.28452
6506	218.081	459.614	PF04588:Hypoxia induced protein conserved region ;		Up	0.00782454	2.10754	Yes	1.07556
6545	20.3532	50.8851			Up	0.00154642	2.5001	Yes	1.32199
6581	2.42682	8.24317	PF00732:Glucose-methanol-choline oxidoreductase ;	GO:0016614-oxidoreductase activity, acting on CH-OH group of donors ; GO:0050660-FAD binding ;	Up	0.00351084	3.3967	Yes	1.76413
6582	4.52387	13.6842		GO:0016491-oxidoreductase activity ; GO:0005506-iron ion binding ; GO:0009058-biosynthetic process ;	Up	0.00141297	3.02489	Yes	1.59688
6621	2.80906	12.1733			Up	1.92001e-05	4.33358	Yes	2.11556
6632	5.77829	16.8707	PF00106:Short-chain dehydrogenase/reductase SDR ;	GO:0033765-steroid dehydrogenase activity, acting on the CH-CH group of donors ; GO:0018452-5-exo-hydroxycamphor dehydrogenase activity ; GO:0016491-oxidoreductase activity ; GO:0043713-(R)-2-hydroxyisocaproate dehydrogenase activity ; GO:0004495-mevaldate reductase activity ; GO:0004033-aldo-keto reductase activity ; GO:0008152-metabolic process ; GO:0018453-2-hydroxytetrahydrofuran dehydrogenas…	Up	0.00031772	2.91967	Yes	1.54581
6682	4.38627	11.8211			Up	0.00227609	2.69502	Yes	1.4303
6707	179.072	371.805			Up	0.011768	2.07629	Yes	1.05401
6710	55.1987	161.42			Up	1.21064e-05	2.92434	Yes	1.54811
6750	9.15899	23.4447			Up	0.00107457	2.55975	Yes	1.356
6817	2.41238	5.80815	PF04253:Transferrin receptor-like dimerisation region ; PF04389:Peptidase M28 ; PF02225:Protease-associated PA ;	GO:0006508-proteolysis ; GO:0043275-glutamate carboxypeptidase II activity ; GO:0008233-peptidase activity ;	Up	0.00542713	2.40764	Yes	1.26762
6824	18.0283	45.4681	PF00168:C2 ;		Up	0.000193647	2.52204	Yes	1.33459
6836	4.2264	22.7132			Up	0.00024545	5.37412	Yes	2.42603
6846	203.048	432.322	PF00227:20S proteasome, A and B subunits ;	GO:0006511-ubiquitin-dependent protein catabolic process ; GO:0004299-proteasome endopeptidase activity ; GO:0004298-threonine endopeptidase activity ; GO:0005839-proteasome core complex ;	Up	0.00651788	2.12916	Yes	1.09029
6886	40.9965	124.98			Up	0.00580641	3.04855	Yes	1.60812
6912	27.7172	75.5453	PF01451:Low molecular weight phosphotyrosine protein phosphatase ;	GO:0004725-protein tyrosine phosphatase activity ; GO:0006470-protein amino acid dephosphorylation ;	Up	0.000198564	2.72557	Yes	1.44656
6967	52.0435	120.75	PF00107:Zinc-containing alcohol dehydrogenase superfamily ;	GO:0008106-alcohol dehydrogenase (NADP+) activity ; GO:0008270-zinc ion binding ; GO:0016491-oxidoreductase activity ;	Up	0.000904502	2.32017	Yes	1.21423
6976	4.00742	13.8656	PF00023:Ankyrin ;	GO:0003950-NAD+ ADP-ribosyltransferase activity ;	Up	3.54647e-06	3.45998	Yes	1.79076
7030	233.764	528.845			Up	0.00915006	2.2623	Yes	1.17779
7041	2.17756	9.28398			Up	3.62633e-06	4.26348	Yes	2.09203
7069	95.6284	210.966			Up	0.00262591	2.2061	Yes	1.1415
7081	69.8287	331.375			Up	9.51806e-09	4.74554	Yes	2.24657
7125	1.08832	2.83258	PF00135:Carboxylesterase, type B ;	GO:0004091-carboxylesterase activity ;	Up	0.00323023	2.60271	Yes	1.38001
7148	10.9646	34.7443			Up	8.19828e-05	3.16877	Yes	1.66392
7150	5.34014	84.4447			Up	0	15.8132	Yes	3.98306
7219	107.431	241.947		GO:0005783-endoplasmic reticulum ; GO:0006886-intracellular protein transport ; GO:0005794-Golgi apparatus ;	Up	0.00242258	2.25212	Yes	1.17128
7221	45.1999	107.994	PF00282:Pyridoxal-dependent decarboxylase ;	GO:0004437-inositol or phosphatidylinositol phosphatase activity ; GO:0004351-glutamate decarboxylase activity ; GO:0030170-pyridoxal phosphate binding ; GO:0019752-carboxylic acid metabolic process ; GO:0006536-glutamate metabolic process ; GO:0016831-carboxy-lyase activity ;	Up	0.000484071	2.38925	Yes	1.25656
7239	962.428	2212.57	PF00187:Chitin-binding, type 1 ;	GO:0008061-chitin binding ;	Up	0.0115946	2.29895	Yes	1.20097
7242	13.436	38.6074	PF00106:Short-chain dehydrogenase/reductase SDR ;	GO:0016491-oxidoreductase activity ; GO:0008152-metabolic process ;	Up	0.000134575	2.87343	Yes	1.52277
7245	292.068	811.545	PF00010:Basic helix-loop-helix dimerisation region bHLH ;	GO:0045449-regulation of transcription ; GO:0030528-transcription regulator activity ; GO:0005634-nucleus ;	Up	0.000268544	2.77862	Yes	1.47437
7286	33.498	81.9077		GO:0016491-oxidoreductase activity ; GO:0008152-metabolic process ;	Up	0.000305957	2.44515	Yes	1.28992
7323	22.1949	53.1798	PF00023:Ankyrin ;		Up	0.00222595	2.39604	Yes	1.26065
7341	112.013	615.304			Up	3.72016e-13	5.49315	Yes	2.45763
7346	927.047	3173.78			Up	1.76346e-05	3.42354	Yes	1.77549
7373	5.0319	10.4692	PF06422:CDR ABC transporter ; PF00005:ABC transporter ;	GO:0016021-integral to membrane ; GO:0042626-ATPase activity, coupled to transmembrane movement of substances ; GO:0017111-nucleoside-triphosphatase activity ; GO:0006810-transport ; GO:0000166-nucleotide binding ; GO:0016887-ATPase activity ; GO:0005524-ATP binding ;	Up	0.0121643	2.08057	Yes	1.05698
7374	2.24396	6.02179	PF00005:ABC transporter ;	GO:0016887-ATPase activity ; GO:0005524-ATP binding ;	Up	0.00484686	2.68355	Yes	1.42415
7378	95.1705	191.949			Up	0.0381337	2.0169	Yes	1.01214
7379	104.288	220.268			Up	0.00626048	2.11211	Yes	1.07869
7451	2.19321	5.51617	PF00144:Beta-lactamase ;	GO:0008800-beta-lactamase activity ; GO:0030655-beta-lactam antibiotic catabolic process ; GO:0046677-response to antibiotic ;	Up	0.0130727	2.51511	Yes	1.33062
7468	119.934	243.365	PF05348:Proteasome maturation factor UMP1 ;		Up	0.0132623	2.02916	Yes	1.02088
7469	3.07157	8.93068			Up	0.00484543	2.90753	Yes	1.53979
7529	110.969	223.856			Up	0.0149372	2.01728	Yes	1.01241
7531	129.409	399.388			Up	3.9928e-06	3.08625	Yes	1.62585
7569	4.66259	11.0382		GO:0005509-calcium ion binding ;	Up	0.00519479	2.3674	Yes	1.2433
7644	28.1329	131.282		GO:0003700-transcription factor activity ; GO:0046983-protein dimerization activity ; GO:0043565-sequence-specific DNA binding ; GO:0006355-regulation of transcription, DNA-dependent ; GO:0005634-nucleus ;	Up	8.05253e-10	4.66649	Yes	2.22234
7651	22.6961	122.836	PF00394:Multicopper oxidase, type 1 ;	GO:0005507-copper ion binding ; GO:0016491-oxidoreductase activity ;	Up	1.75846e-11	5.41221	Yes	2.43622
7652	34.3048	134.404			Up	3.83733e-08	3.91794	Yes	1.97009
7667	3.20903	19.8582			Up	4.71273e-07	6.18823	Yes	2.62953
7687	15.9871	64.8256			Up	3.1057e-08	4.05487	Yes	2.01966
7733	0.962039	8.74742	PF01360:Flavoprotein monooxygenase ;	GO:0016491-oxidoreductase activity ; GO:0008152-metabolic process ;	Up	1.55294e-08	9.09258	Yes	3.18469
7741	119.61	541.34	PF00083:General substrate transporter ;	GO:0016021-integral to membrane ; GO:0006810-transport ; GO:0005215-transporter activity ;	Up	2.76184e-07	4.52588	Yes	2.1782
7771	10.3978	29.1916	PF00795:Nitrilase/cyanide hydratase and apolipoprotein N-acyltransferase ;	GO:0006807-nitrogen compound metabolic process ; GO:0016810-hydrolase activity, acting on carbon-nitrogen (but not peptide) bonds ;	Up	0.000116945	2.80748	Yes	1.48927
7860	3.80473	8.59664			Up	0.0154571	2.25946	Yes	1.17598
7867	513.92	2073.01			Up	5.65247e-07	4.03372	Yes	2.01211
7897	4.03878	9.58526			Up	0.00339454	2.37331	Yes	1.2469
7898	43.4932	169.553			Up	8.57001e-09	3.89838	Yes	1.96287
7957	248.173	533.234	PF00011:Heat shock protein Hsp20 ;		Up	0.00779698	2.14864	Yes	1.10342
7983	33.2688	79.6317			Up	0.00101527	2.39358	Yes	1.25917
7994	12.6228	26.2898	PF03403:Platelet-activating factor acetylhydrolase, plasma/intracellular isoform II ;	GO:0008247-2-acetyl-1-alkylglycerophosphocholine esterase complex ; GO:0003847-1-alkyl-2-acetylglycerophosphocholine esterase activity ; GO:0016042-lipid catabolic process ;	Up	0.00796498	2.08272	Yes	1.05847
8007	172.597	539.437			Up	1.87945e-05	3.12541	Yes	1.64405
8075	4.7722	9.75298	PF00083:General substrate transporter ;	GO:0016021-integral to membrane ; GO:0016020-membrane ; GO:0005215-transporter activity ; GO:0008643-carbohydrate transport ; GO:0006810-transport ; GO:0005351-sugar:hydrogen symporter activity ; GO:0008733-L-arabinose isomerase activity ;	Up	0.0221618	2.04371	Yes	1.03119
8077	242.101	672.82			Up	6.39057e-05	2.77909	Yes	1.47461
8119	4.79078	10.5511	PF00501:AMP-dependent synthetase and ligase ;	GO:0003824-catalytic activity ; GO:0008152-metabolic process ; GO:0016207-4-coumarate-CoA ligase activity ;	Up	0.0083783	2.20238	Yes	1.13906
8124	294.852	626.302	PF00885:6,7-dimethyl-8-ribityllumazine synthase ;	GO:0009349-riboflavin synthase complex ; GO:0009231-riboflavin biosynthetic process ; GO:0004746-riboflavin synthase activity ;	Up	0.0164343	2.12412	Yes	1.08687
8182	110.934	284.46			Up	0.00148606	2.56423	Yes	1.35852
8187	2.81349	6.89185	PF00023:Ankyrin ;		Up	0.0143564	2.44957	Yes	1.29253
8202	13.658	37.8052			Up	0.0265548	2.76799	Yes	1.46884
8203	22.3155	76.416	PF00083:General substrate transporter ;	GO:0016021-integral to membrane ; GO:0016020-membrane ; GO:0006508-proteolysis ; GO:0005215-transporter activity ; GO:0008643-carbohydrate transport ; GO:0006810-transport ; GO:0008237-metallopeptidase activity ; GO:0008270-zinc ion binding ; GO:0005351-sugar:hydrogen symporter activity ;	Up	3.29726e-07	3.42435	Yes	1.77583
8205	11.9292	28.8267	PF01070:FMN-dependent alpha-hydroxy acid dehydrogenase ;	GO:0008891-glycolate oxidase activity ; GO:0003973-(S)-2-hydroxy-acid oxidase activity ; GO:0009339-glycolate oxidase complex ; GO:0006118-electron transport ; GO:0016491-oxidoreductase activity ;	Up	0.000906845	2.41648	Yes	1.27291
8235	1.23549	4.0479			Up	0.0363064	3.27635	Yes	1.71209
8284	22.4965	49.0433	PF02727:Copper amine oxidase ;	GO:0005507-copper ion binding ; GO:0009308-amine metabolic process ; GO:0008131-amine oxidase activity ; GO:0048038-quinone binding ;	Up	0.00951009	2.18004	Yes	1.12436
8304	0.992637	6.98644			Up	0.011768	7.03826	Yes	2.81522
8306	44.23	96.365	PF00191:Annexin ;	GO:0005544-calcium-dependent phospholipid binding ; GO:0005509-calcium ion binding ; GO:0047394-glycerophosphoinositol inositolphosphodiesterase activity ;	Up	0.00304256	2.17872	Yes	1.12348
8313	58.9786	149.782			Up	0.000241335	2.5396	Yes	1.3446
8364	35.7377	143.179			Up	5.1094e-08	4.00639	Yes	2.0023
8425	106.551	222.002	PF00107:Zinc-containing alcohol dehydrogenase superfamily ;	GO:0008270-zinc ion binding ; GO:0003960-NADPH:quinone reductase activity ; GO:0016491-oxidoreductase activity ;	Up	0.00716295	2.08353	Yes	1.05903
8486	75.8378	157.394			Up	0.00703547	2.0754	Yes	1.05339
8487	100.035	246.432			Up	0.000357981	2.46346	Yes	1.30068
8502	1.99504	4.20627	PF00501:AMP-dependent synthetase and ligase ;	GO:0003824-catalytic activity ; GO:0008152-metabolic process ; GO:0016207-4-coumarate-CoA ligase activity ;	Up	0.0447572	2.10836	Yes	1.07612
8515	54.5685	228.698			Up	4.15332e-08	4.19103	Yes	2.0673
8517	14.7091	45.246	PF06766:Hydrophobin 2 ;	GO:0005576-extracellular region ; GO:0007154-cell communication ; GO:0005618-cell wall ;	Up	0.00558966	3.07605	Yes	1.62108
8543	57.577	126.351			Up	0.00270298	2.19447	Yes	1.13387
8566	82.4965	353.103			Up	6.08046e-08	4.28022	Yes	2.09768
8574	30.2424	68.7838			Up	0.00428723	2.27442	Yes	1.1855
8583	149.038	332.616	PF01145:Band 7 protein ;	GO:0016020-membrane ;	Up	0.00330813	2.23175	Yes	1.15818
8586	13.0367	29.6907			Up	0.00151686	2.27747	Yes	1.18743
8610	35.5326	79.3263			Up	0.00151686	2.23249	Yes	1.15866
8638	26.7944	67.1651	PF03853:YjeF-related protein, N-terminal ;		Up	0.000665778	2.50668	Yes	1.32578
8644	17.7817	48.6572			Up	0.0128077	2.73636	Yes	1.45226
8655	24.9546	51.9934	PF01435:Peptidase M48, Ste24p ;	GO:0008270-zinc ion binding ; GO:0016020-membrane ; GO:0004222-metalloendopeptidase activity ; GO:0008237-metallopeptidase activity ; GO:0006508-proteolysis ;	Up	0.00737638	2.08352	Yes	1.05902
8728	6.41234	20.163			Up	0.000271775	3.14441	Yes	1.65279
8778	9.33913	28.2638			Up	5.28356e-05	3.02638	Yes	1.5976
8793	9.30716	36.2555			Up	0.00421042	3.89544	Yes	1.96179
8833	14.8608	31.4497	PF00596:Class II aldolase/adducin, N-terminal ;	GO:0046872-metal ion binding ;	Up	0.0105813	2.11629	Yes	1.08153
8851	5.08129	21.6149			Up	1.62842e-06	4.25382	Yes	2.08876
8855	19.8732	65.8492	PF01565:FAD linked oxidase, N-terminal ;	GO:0018498-2,3-dihydroxy-2,3-dihydro-phenylpropionate dehydrogenase activity ; GO:0016491-oxidoreductase activity ; GO:0018500-trans-9R,10R-dihydrodiolphenanthrene dehydrogenase activity ; GO:0043786-cinnamate reductase activity ; GO:0018499-cis-2,3-dihydrodiol DDT dehydrogenase activity ; GO:0018503-trans-1,2-dihydrodiolphenanthrene dehydrogenase activity ; GO:0018502-2,5-dichloro-2,5-cyclohexad…	Up	4.71272e-07	3.31347	Yes	1.72834
8863	74.9775	215.02			Up	2.07604e-05	2.86779	Yes	1.51994
8942	33.0634	79.7284		GO:0047372-acylglycerol lipase activity ; GO:0016787-hydrolase activity ;	Up	0.000485095	2.41138	Yes	1.26986
8980	53.9136	423.714	PF01565:FAD linked oxidase, N-terminal ;	GO:0019139-cytokinin dehydrogenase activity ; GO:0050660-FAD binding ; GO:0016491-oxidoreductase activity ;	Up	0	7.85913	Yes	2.97437
9011	52.2082	120.731			Up	0.00716723	2.31249	Yes	1.20945
9025	6.65047	16.963			Up	0.00139453	2.55065	Yes	1.35086
9069	25.8727	58.4184	PF05032:Spo12 ;		Up	0.0143877	2.25792	Yes	1.17499
9096	3.35087	9.67599			Up	0.00363347	2.88761	Yes	1.52987
9101	1611	3683.38			Up	0.0017365	2.28639	Yes	1.19307
9261	65.3752	130.793			Up	0.00998452	2.00065	Yes	1.00047
9315	19.0079	70.4947	PF00069:Protein kinase ;	GO:0043771-cytidine kinase activity ; GO:0008443-phosphofructokinase activity ; GO:0035004-phosphoinositide 3-kinase activity ; GO:0042557-eukaryotic elongation factor-2 kinase activator activity ; GO:0051731-polynucleotide kinase activity ; GO:0043743-LPPG:FO 2-phospho-L-lactate transferase activity ; GO:0043841-(S)-lactate 2-kinase activity ; GO:0032942-inositol tetrakisphosphate 2-kinase activ…	Up	2.72919e-08	3.70871	Yes	1.89092
9379	76.7457	229.363	PF01243:Pyridoxamine 5'-phosphate oxidase-related ;	GO:0010181-FMN binding ;	Up	2.01161e-05	2.98861	Yes	1.57947
9384	18.4667	108.333			Up	6.80029e-14	5.8664	Yes	2.55247
9393	47.4208	113.435			Up	0.00617255	2.39209	Yes	1.25827
9417	59.2758	146.246			Up	0.00148606	2.46721	Yes	1.30288
9437	140.245	358.017	PF00085:Thioredoxin-related ;	GO:0004791-thioredoxin-disulfide reductase activity ; GO:0045454-cell redox homeostasis ;	Up	0.000418793	2.5528	Yes	1.35208
9517	86.7672	212.781			Up	0.00389573	2.45232	Yes	1.29415
9518	21.99	51.0836	PF00172:Fungal transcriptional regulatory protein, N-terminal ;	GO:0003700-transcription factor activity ; GO:0008270-zinc ion binding ; GO:0006355-regulation of transcription, DNA-dependent ; GO:0005634-nucleus ;	Up	0.000947232	2.32304	Yes	1.21601
9527	922.625	4598.74			Up	1.43234e-06	4.98441	Yes	2.31742
9528	5.4489	18.7363			Up	0.011017	3.43855	Yes	1.7818
9547	22.531	45.4273			Up	0.00905113	2.01621	Yes	1.01165
9548	20.9074	57.0519			Up	0.000163556	2.72879	Yes	1.44826
9569	7.23252	21.7739	PF01323:DSBA oxidoreductase ;	GO:0015035-protein disulfide oxidoreductase activity ; GO:0030288-outer membrane-bounded periplasmic space ;	Up	4.59358e-05	3.01056	Yes	1.59003
9572	6.58905	15.26			Up	0.0038067	2.31596	Yes	1.21161
9590	4.68001	11.3476			Up	0.0461716	2.4247	Yes	1.2778
9606	66.8381	286.213			Up	2.00315e-08	4.28218	Yes	2.09835
9651	7.11166	18.4448	PF02586:Protein of unknown function DUF159 ;		Up	0.000828504	2.5936	Yes	1.37496
9654	4.26492	15.0537	PF06985:Heterokaryon incompatibility ;		Up	3.87468e-06	3.52966	Yes	1.81953
9700	1.79369	4.71388	PF00106:Short-chain dehydrogenase/reductase SDR ;	GO:0047038-D-arabinitol 2-dehydrogenase activity ; GO:0016491-oxidoreductase activity ; GO:0008152-metabolic process ;	Up	0.0252732	2.62803	Yes	1.39398
9821	101.976	263.725			Up	0.000138749	2.58615	Yes	1.3708
9905	50.5775	126.14			Up	0.000357981	2.49399	Yes	1.31846
9951	403.852	914.916			Up	0.0017627	2.26547	Yes	1.17981
9986	332.131	984.072			Up	1.03587e-05	2.9629	Yes	1.56701
10049	18.8171	80.3649	PF00664:ABC transporter, transmembrane region ; PF00005:ABC transporter ;	GO:0016021-integral to membrane ; GO:0042626-ATPase activity, coupled to transmembrane movement of substances ; GO:0017111-nucleoside-triphosphatase activity ; GO:0006810-transport ; GO:0000166-nucleotide binding ; GO:0016887-ATPase activity ; GO:0005524-ATP binding ;	Up	7.24125e-07	4.27084	Yes	2.09452
10062	5.64995	14.5374	PF04389:Peptidase M28 ; PF02225:Protease-associated PA ;	GO:0006508-proteolysis ; GO:0016284-alanine aminopeptidase activity ; GO:0008233-peptidase activity ;	Up	0.000482861	2.57301	Yes	1.36346
10117	4.66306	13.5722			Up	0.00698461	2.91058	Yes	1.54131
10142	1998.54	4347.92			Up	0.00366966	2.17555	Yes	1.12138
10149	72.9485	174.285			Up	0.00148606	2.38915	Yes	1.2565
10150	340.851	795.907			Up	0.0132603	2.33506	Yes	1.22346
10185	40.6913	103.438	PF01467:Cytidylyltransferase ;	GO:0003824-catalytic activity ; GO:0016779-nucleotidyltransferase activity ; GO:0009058-biosynthetic process ; GO:0016491-oxidoreductase activity ;	Up	0.000149256	2.54202	Yes	1.34597
10218	1.6723	4.03972	PF06985:Heterokaryon incompatibility ;		Up	0.00959741	2.41567	Yes	1.27242
10220	132.348	322.532			Up	0.000553149	2.437	Yes	1.28511
10286	6.35497	17.0347			Up	0.00154642	2.68053	Yes	1.42252
10299	97.255	379.061			Up	1.45644e-07	3.8976	Yes	1.96259
10370	42.1437	150.74	PF00708:Acylphosphatase ;	GO:0003998-acylphosphatase activity ;	Up	5.29667e-05	3.57681	Yes	1.83867
10376	90.8928	247.003			Up	0.000811771	2.71752	Yes	1.44229
10409	230.958	785.123			Up	4.95606e-07	3.39942	Yes	1.76529
10494	14.258	464.825			Up	0	32.601	Yes	5.02684
10513	29.1683	79.97	PF01871:Protein of unknown function DUF51 ;		Up	8.53161e-05	2.74168	Yes	1.45506
10529	19.3961	45.5842			Up	0.00390787	2.35017	Yes	1.23277
10557	179.679	421.716	PF02991:Light chain 3 (LC3) ;		Up	0.000792086	2.34705	Yes	1.23085
10592	74.3241	166.509			Up	0.00260391	2.24031	Yes	1.1637
10649	25.7559	433.785			Up	6.8003e-14	16.8422	Yes	4.07401
10655	15.4266	42.7924			Up	0.000608285	2.77394	Yes	1.47193
10687	26.0407	75.7893			Up	0.000683004	2.91042	Yes	1.54123
45	2.37678	0.660062			Down	0.0127177	0.277713	Yes	-1.84833
53	83.7622	38.5821	PF01619:Proline dehydrogenase ;	GO:0051700-fructosyl-amino acid oxidase activity ; GO:0006562-proline catabolic process ; GO:0006537-glutamate biosynthetic process ; GO:0004657-proline dehydrogenase activity ; GO:0004154-dihydropterin oxidase activity ; GO:0019116-hydroxy-nicotine oxidase activity ; GO:0051699-proline oxidase activity ;	Down	0.00284031	0.460615	Yes	-1.11837
94	9.723	4.55026			Down	0.0262992	0.467989	Yes	-1.09545
106	15.4891	3.59738			Down	7.2461e-05	0.232252	Yes	-2.10623
117	3.48999	1.32822	PF00172:Fungal transcriptional regulatory protein, N-terminal ;	GO:0003700-transcription factor activity ; GO:0008270-zinc ion binding ; GO:0006355-regulation of transcription, DNA-dependent ; GO:0005634-nucleus ;	Down	0.00471843	0.38058	Yes	-1.39373
118	12.3805	4.08941	PF00773:Ribonuclease II ;	GO:0004540-ribonuclease activity ; GO:0003723-RNA binding ;	Down	2.84069e-05	0.330311	Yes	-1.5981
129	5.97962	2.84124		GO:0004274-dipeptidyl-peptidase IV activity ;	Down	0.0176615	0.475154	Yes	-1.07353
152	3.33531	1.13035		GO:0003677-DNA binding ;	Down	0.0071129	0.338904	Yes	-1.56105
159	6.2122	2.22047	PF05577:Peptidase S28 ;	GO:0008236-serine-type peptidase activity ; GO:0006508-proteolysis ; GO:0008234-cysteine-type peptidase activity ;	Down	0.000620169	0.357437	Yes	-1.48424
166	8.21613	1.65932			Down	1.41782e-09	0.201959	Yes	-2.30787
182	53.1051	25.2647	PF00649:Copper fist DNA-binding ;	GO:0003700-transcription factor activity ; GO:0003677-DNA binding ; GO:0006355-regulation of transcription, DNA-dependent ; GO:0005634-nucleus ; GO:0005507-copper ion binding ;	Down	0.00580641	0.475749	Yes	-1.07173
186	5.79254	0.98437			Down	0.0167203	0.169938	Yes	-2.55692
225	2.38925	0.234862			Down	0.000609196	0.0982995	Yes	-3.34667
226	2.96122	0.237678			Down	0.0124689	0.0802635	Yes	-3.63911
298	13.0517	5.43733	PF00134:Cyclin, N-terminal ; PF02984:Cyclin, C-terminal ;	GO:0005634-nucleus ;	Down	0.0021136	0.416599	Yes	-1.26327
342	3.70395	1.63518		GO:0016021-integral to membrane ; GO:0006810-transport ; GO:0005215-transporter activity ;	Down	0.033637	0.441469	Yes	-1.17962
377	52.6514	5.73863	PF03443:Glycoside hydrolase, family 61 ;		Down	0	0.108993	Yes	-3.19769
388	23.672	5.67021	PF03211:Pectate lyase ;	GO:0005576-extracellular region ; GO:0030570-pectate lyase activity ;	Down	1.03587e-05	0.239532	Yes	-2.06171
425	4.26014	1.39841		GO:0016021-integral to membrane ; GO:0006810-transport ; GO:0005215-transporter activity ;	Down	0.0030225	0.328254	Yes	-1.60711
444	16.7908	6.97798			Down	0.00408024	0.415584	Yes	-1.26679
445	12.3855	4.501			Down	0.000715976	0.363409	Yes	-1.46033
462	42.6484	11.8863			Down	1.98035e-07	0.278704	Yes	-1.84319
490	22.6974	11.0611		GO:0010181-FMN binding ; GO:0016491-oxidoreductase activity ;	Down	0.0117959	0.487329	Yes	-1.03703
526	37.5359	13.3411	PF00078:RNA-directed DNA polymerase (Reverse transcriptase) ;	GO:0006278-RNA-dependent DNA replication ; GO:0003964-RNA-directed DNA polymerase activity ; GO:0003723-RNA binding ;	Down	0.00150437	0.355422	Yes	-1.49239
568	25.7511	12.2526			Down	0.0102604	0.475809	Yes	-1.07155
581	30.9105	13.9965	PF02629:CoA-binding ; PF00549:ATP-citrate lyase/succinyl-CoA ligase ;	GO:0042709-succinate-CoA ligase complex ; GO:0003824-catalytic activity ; GO:0004775-succinate-CoA ligase (ADP-forming) activity ; GO:0009361-succinate-CoA ligase complex (ADP-forming) ; GO:0008152-metabolic process ;	Down	0.00357751	0.452807	Yes	-1.14303
601	22.935	8.99909	PF03443:Glycoside hydrolase, family 61 ;		Down	0.000459476	0.392374	Yes	-1.3497
603	9.74483	4.24257	PF00271:Helicase, C-terminal ;	GO:0003676-nucleic acid binding ; GO:0004386-helicase activity ; GO:0005524-ATP binding ;	Down	0.00738329	0.435366	Yes	-1.1997
604	8.44589	2.87943	PF00270:DEAD/DEAH box helicase, N-terminal ;	GO:0008026-ATP-dependent helicase activity ; GO:0003676-nucleic acid binding ; GO:0005524-ATP binding ;	Down	0.00136341	0.340927	Yes	-1.55247
612	3.34297	1.64132			Down	0.0349186	0.490977	Yes	-1.02627
630	35.7693	15.9704			Down	0.00287497	0.446483	Yes	-1.16332
636	28.7588	8.98683	PF00076:RNA-binding region RNP-1 (RNA recognition motif) ;	GO:0003676-nucleic acid binding ;	Down	3.0887e-06	0.31249	Yes	-1.67812
654	73.6263	27.5759	PF00988:Carbamoyl-phosphate synthase, small chain ;	GO:0004086-carbamoyl-phosphate synthase activity ; GO:0006807-nitrogen compound metabolic process ;	Down	0.000849537	0.374539	Yes	-1.41681
655	66.7847	27.0111	PF00289:Carbamoyl-phosphate synthetase large chain, N-terminal ; PF00117:Glutamine amidotransferase class-I ;	GO:0004086-carbamoyl-phosphate synthase activity ; GO:0006807-nitrogen compound metabolic process ; GO:0003824-catalytic activity ; GO:0008152-metabolic process ; GO:0006541-glutamine metabolic process ; GO:0009058-biosynthetic process ; GO:0005524-ATP binding ;	Down	0.00178003	0.40445	Yes	-1.30597
656	72.2983	27.801	PF02786:Carbamoyl-phosphate synthase L chain, ATP-binding ; PF00289:Carbamoyl-phosphate synthetase large chain, N-terminal ; PF02787:Carbamoyl-phosphate synthetase large chain, oligomerisation ;	GO:0004086-carbamoyl-phosphate synthase activity ; GO:0006807-nitrogen compound metabolic process ; GO:0003824-catalytic activity ; GO:0008152-metabolic process ; GO:0005524-ATP binding ;	Down	0.000654065	0.384532	Yes	-1.37882
684	143.761	52.7971		GO:0004254-acylaminoacyl-peptidase activity ;	Down	3.48693e-05	0.367256	Yes	-1.44514
706	4.04214	1.21472	PF01565:FAD linked oxidase, N-terminal ;	GO:0050660-FAD binding ; GO:0016491-oxidoreductase activity ;	Down	0.000224248	0.300514	Yes	-1.7345
721	9.09194	3.99233	PF00004:AAA ATPase, central region ;	GO:0042625-ATPase activity, coupled to transmembrane movement of ions ; GO:0042626-ATPase activity, coupled to transmembrane movement of substances ; GO:0004004-ATP-dependent RNA helicase activity ; GO:0017111-nucleoside-triphosphatase activity ; GO:0008026-ATP-dependent helicase activity ; GO:0000166-nucleotide binding ; GO:0015462-protein-transmembrane transporting ATPase activity ; GO:0008094-…	Down	0.00435103	0.439107	Yes	-1.18736
724	8.25111	3.23046	PF00930:Peptidase S9B, dipeptidylpeptidase IV N-terminal ; PF00326:Peptidase S9, prolyl oligopeptidase active site region ;	GO:0008236-serine-type peptidase activity ; GO:0006508-proteolysis ; GO:0008240-tripeptidyl-peptidase activity ; GO:0016020-membrane ; GO:0004274-dipeptidyl-peptidase IV activity ; GO:0004287-prolyl oligopeptidase activity ;	Down	0.000849537	0.391518	Yes	-1.35285
739	28.0932	11.6097		GO:0000166-nucleotide binding ; GO:0017111-nucleoside-triphosphatase activity ;	Down	0.00190545	0.413257	Yes	-1.27489
741	16.0888	5.9617			Down	0.00158828	0.37055	Yes	-1.43226
783	1059.12	510.398		GO:0033754-indoleamine 2,3-dioxygenase activity ;	Down	0.0317308	0.481908	Yes	-1.05317
833	31.3268	11.1891	PF01728:Ribosomal RNA methyltransferase RrmJ/FtsJ ;	GO:0016434-rRNA (cytosine) methyltransferase activity ; GO:0016274-protein-arginine N-methyltransferase activity ; GO:0019702-protein-arginine N5-methyltransferase activity ; GO:0016427-tRNA (cytosine)-methyltransferase activity ; GO:0030792-methylarsonite methyltransferase activity ; GO:0008276-protein methyltransferase activity ; GO:0018707-1-phenanthrol methyltransferase activity ; GO:0016278-…	Down	4.89667e-05	0.357173	Yes	-1.4853
865	22.756	8.42221			Down	0.000763242	0.370109	Yes	-1.43398
891	15.8308	7.6961			Down	0.0463716	0.486147	Yes	-1.04053
915	14.564	5.51065			Down	0.000230011	0.378375	Yes	-1.40211
944	74.1245	32.7038	PF01536:S-adenosylmethionine decarboxylase ;	GO:0004014-adenosylmethionine decarboxylase activity ; GO:0008295-spermidine biosynthetic process ; GO:0003824-catalytic activity ; GO:0006597-spermine biosynthetic process ;	Down	0.00147835	0.441201	Yes	-1.18049
949	2.02363	0.838805			Down	0.0125682	0.414505	Yes	-1.27054
958	28.2418	13.8073	PF00586:AIR synthase related protein ;	GO:0003824-catalytic activity ;	Down	0.0148586	0.488896	Yes	-1.0324
990	24.6878	8.84952			Down	0.000399267	0.358457	Yes	-1.48013
991	27.8426	11.4514			Down	0.00154636	0.411291	Yes	-1.28177
1047	52.3344	19.0039			Down	7.26414e-05	0.363124	Yes	-1.46146
1063	1.84225	0.729247			Down	0.029691	0.395846	Yes	-1.33699
1076	27.245	13.4547	PF04851:Type III restriction enzyme, res subunit ; PF00271:Helicase, C-terminal ; PF00270:DEAD/DEAH box helicase, N-terminal ;	GO:0008796-bis(5'-nucleosyl)-tetraphosphatase activity ; GO:0008413-8-oxo-7,8-dihydroguanine triphosphatase activity ; GO:0019177-dihydroneopterin triphosphate pyrophosphohydrolase activity ; GO:0008758-UDP-2,3-diacylglucosamine hydrolase activity ; GO:0004787-thiamin-pyrophosphatase activity ; GO:0003676-nucleic acid binding ; GO:0000810-diacylglycerol pyrophosphate phosphatase activity ; GO:000…	Down	0.0104961	0.493841	Yes	-1.01788
1084	11.0614	3.53055			Down	0.000357981	0.319178	Yes	-1.64757
1085	14.7255	4.41621			Down	0.00018962	0.299902	Yes	-1.73744
1086	19.735	7.08476			Down	0.00026252	0.358995	Yes	-1.47797
1087	16.4966	1.58826	PF00295:Glycoside hydrolase, family 28 ;	GO:0005975-carbohydrate metabolic process ; GO:0004650-polygalacturonase activity ;	Down	0	0.096278	Yes	-3.37665
1108	0.925625	0.252722	PF01095:Pectinesterase ;	GO:0005618-cell wall ; GO:0030599-pectinesterase activity ; GO:0042545-cell wall modification ; GO:0004339-glucan 1,4-alpha-glucosidase activity ;	Down	0.000469328	0.273028	Yes	-1.87288
1142	41.336	18.3148			Down	0.00417698	0.443071	Yes	-1.17439
1143	39.13	18.6475			Down	0.00605335	0.476553	Yes	-1.06929
1186	4.61174	0.978718			Down	9.83149e-05	0.212223	Yes	-2.23635
1296	10.3311	4.48194	PF00248:Aldo/keto reductase ;	GO:0043826-sulfur oxygenase reductase activity ; GO:0043738-F420H2 dehydrogenase activity ; GO:0043883-malolactic enzyme activity ; GO:0051341-regulation of oxidoreductase activity ; GO:0016491-oxidoreductase activity ;	Down	0.010177	0.43383	Yes	-1.2048
1348	5.34877	2.25059			Down	0.00948218	0.420768	Yes	-1.2489
1362	120.885	53.205	PF00005:ABC transporter ;	GO:0000166-nucleotide binding ; GO:0017111-nucleoside-triphosphatase activity ; GO:0016887-ATPase activity ; GO:0005524-ATP binding ;	Down	0.00164127	0.440129	Yes	-1.184
1372	19.7112	7.96095	PF00400:G-protein beta WD-40 repeat ;		Down	0.000569661	0.40388	Yes	-1.308
1395	10.3753	4.99168	PF00246:Peptidase M14, carboxypeptidase A ;	GO:0006508-proteolysis ; GO:0008270-zinc ion binding ; GO:0004182-carboxypeptidase A activity ;	Down	0.0164674	0.481112	Yes	-1.05556
1397	59.7812	21.4285	PF01227:GTP cyclohydrolase I ;	GO:0003934-GTP cyclohydrolase I activity ; GO:0005737-cytoplasm ; GO:0019438-aromatic compound biosynthetic process ;	Down	5.32036e-05	0.358449	Yes	-1.48016
1412	22.3942	8.623	PF00400:G-protein beta WD-40 repeat ; PF04047:Periodic tryptophan protein-associated region ;		Down	0.000185484	0.385055	Yes	-1.37686
1432	11.3547	5.55583			Down	0.0452514	0.489298	Yes	-1.03122
1445	21.6221	8.39203		GO:0003700-transcription factor activity ; GO:0005622-intracellular ; GO:0006355-regulation of transcription, DNA-dependent ; GO:0043565-sequence-specific DNA binding ;	Down	0.00533036	0.388123	Yes	-1.36541
1478	2.72459	0.720484			Down	0.0114736	0.264438	Yes	-1.919
1479	3.961	1.06562			Down	0.00425362	0.269028	Yes	-1.89417
1487	3.71935	1.32231			Down	0.029531	0.355522	Yes	-1.49199
1488	87.5525	32.532	PF02219:Methylenetetrahydrofolate reductase ;	GO:0004489-methylenetetrahydrofolate reductase (NADPH) activity ; GO:0006555-methionine metabolic process ;	Down	5.23587e-05	0.371571	Yes	-1.42829
1507	56.1208	25.2701	PF06858:Nucleolar GTP-binding 1 ;	GO:0005525-GTP binding ;	Down	0.00215106	0.45028	Yes	-1.1511
1545	199.772	99.0028			Down	0.00902654	0.495579	Yes	-1.01281
1562	14.5438	5.64588			Down	0.00327992	0.388198	Yes	-1.36513
1563	11.7696	4.47281			Down	0.00304256	0.380031	Yes	-1.39581
1565	147.009	62.1498	PF00109:Beta-ketoacyl synthase ; PF02801:Beta-ketoacyl synthase ; PF01648:4'-phosphopantetheinyl transferase ;	GO:0009058-biosynthetic process ; GO:0009059-macromolecule biosynthetic process ; GO:0003824-catalytic activity ; GO:0004315-3-oxoacyl-[acyl-carrier-protein] synthase activity ; GO:0008897-phosphopantetheinyltransferase activity ; GO:0000287-magnesium ion binding ; GO:0006633-fatty acid biosynthetic process ;	Down	0.0013016	0.422762	Yes	-1.24208
1566	88.4245	33.7212			Down	0.000443081	0.381356	Yes	-1.39079
1567	102.253	43.7215	PF00698:Acyl transferase region ; PF01575:MaoC-like dehydratase ;	GO:0005835-fatty acid synthase complex ; GO:0016491-oxidoreductase activity ; GO:0006633-fatty acid biosynthetic process ; GO:0008152-metabolic process ; GO:0016740-transferase activity ; GO:0004312-fatty-acid synthase activity ;	Down	0.00445441	0.427582	Yes	-1.22573
1569	20.461	9.75646	PF00067:Cytochrome P450 ;	GO:0050381-unspecific monooxygenase activity ; GO:0005506-iron ion binding ; GO:0006118-electron transport ; GO:0020037-heme binding ; GO:0004497-monooxygenase activity ; GO:0016712-oxidoreductase activity, acting on paired donors, with incorporation or reduction of molecular oxygen, reduced flavin or flavoprotein as one donor, and incorporation of one atom of oxygen ;	Down	0.0090603	0.476832	Yes	-1.06845
1701	11.3378	3.35379			Down	0.000293325	0.295806	Yes	-1.75728
1716	61.6196	25.5924			Down	0.00262415	0.415329	Yes	-1.26767
1747	22.7679	3.42208			Down	6.80029e-14	0.150303	Yes	-2.73406
1758	7.01919	2.7575	PF00550:Phosphopantetheine-binding ; PF00668:Condensation domain ; PF00501:AMP-dependent synthetase and ligase ;	GO:0031177-phosphopantetheine binding ; GO:0048037-cofactor binding ; GO:0003824-catalytic activity ; GO:0008152-metabolic process ; GO:0016874-ligase activity ;	Down	0.00051205	0.392852	Yes	-1.34794
1765	14.1196	3.34068			Down	3.1057e-08	0.236599	Yes	-2.07949
1812	726.868	127.558	PF03297:S25 ribosomal protein ;		Down	3.67914e-06	0.17549	Yes	-2.51054
1834	13.0587	5.46273	PF00860:Xanthine/uracil/vitamin C permease ;	GO:0006810-transport ; GO:0016020-membrane ; GO:0005215-transporter activity ; GO:0005515-protein binding ;	Down	0.00202612	0.418321	Yes	-1.25732
1870	222.66	70.3307	PF00464:Glycine hydroxymethyltransferase ;	GO:0006544-glycine metabolic process ; GO:0004372-glycine hydroxymethyltransferase activity ; GO:0006563-L-serine metabolic process ;	Down	1.04532e-06	0.315866	Yes	-1.66262
1873	82.8456	38.5089	PF00538:Histone H1/H5 ;	GO:0006334-nucleosome assembly ; GO:0003677-DNA binding ; GO:0000786-nucleosome ; GO:0005634-nucleus ;	Down	0.00445441	0.464827	Yes	-1.10523
1885	6.0688	2.6964			Down	0.0115191	0.444305	Yes	-1.17038
1897	201.636	86.3375	PF00271:Helicase, C-terminal ;	GO:0003676-nucleic acid binding ; GO:0004386-helicase activity ; GO:0005524-ATP binding ;	Down	0.00167615	0.428185	Yes	-1.22369
1898	177.212	72.8808			Down	0.000476473	0.411263	Yes	-1.28187
1916	4.1241	1.87464	PF00109:Beta-ketoacyl synthase ; PF00107:Zinc-containing alcohol dehydrogenase superfamily ; PF00698:Acyl transferase region ; PF02801:Beta-ketoacyl synthase ;	GO:0016491-oxidoreductase activity ; GO:0031177-phosphopantetheine binding ; GO:0003824-catalytic activity ; GO:0008152-metabolic process ; GO:0008270-zinc ion binding ; GO:0009058-biosynthetic process ; GO:0016740-transferase activity ;	Down	0.00834118	0.454557	Yes	-1.13747
1928	16.7167	5.81717	PF00400:G-protein beta WD-40 repeat ;		Down	7.03104e-05	0.347986	Yes	-1.5229
1929	29.1667	10.759			Down	0.000339314	0.36888	Yes	-1.43878
1955	12.7049	3.86737	PF00400:G-protein beta WD-40 repeat ; PF04192:Utp21 specific WD40-associated ;	GO:0032040-small subunit processome ; GO:0006364-rRNA processing ;	Down	6.25977e-06	0.3044	Yes	-1.71596
2026	15.364	7.5687		GO:0004221-ubiquitin thiolesterase activity ;	Down	0.0143308	0.492626	Yes	-1.02144
2054	139.192	69.2598			Down	0.0148598	0.497585	Yes	-1.00699
2078	10.8902	4.78574			Down	0.0132218	0.439454	Yes	-1.18622
2081	12.3803	3.51247	PF03813:Nrap protein ;		Down	4.30186e-06	0.283714	Yes	-1.81749
2106	8.54127	3.6283			Down	0.0295918	0.424796	Yes	-1.23516
2119	10.1795	4.602	PF00271:Helicase, C-terminal ; PF00270:DEAD/DEAH box helicase, N-terminal ; PF04408:Helicase-associated region ;	GO:0042625-ATPase activity, coupled to transmembrane movement of ions ; GO:0042626-ATPase activity, coupled to transmembrane movement of substances ; GO:0003676-nucleic acid binding ; GO:0004004-ATP-dependent RNA helicase activity ; GO:0017116-single-stranded DNA-dependent ATP-dependent DNA helicase activity ; GO:0008026-ATP-dependent helicase activity ; GO:0015462-protein-transmembrane transport…	Down	0.00666261	0.452085	Yes	-1.14533
2126	0.957756	0.320497		GO:0004308-exo-alpha-sialidase activity ;	Down	0.0495169	0.334633	Yes	-1.57935
2163	27.2075	10.5643	PF05148:Protein of unknown function DUF691 ;	GO:0003910-DNA ligase (ATP) activity ;	Down	0.000270747	0.388286	Yes	-1.36481
2236	35.0946	13.5078		GO:0004308-exo-alpha-sialidase activity ;	Down	0.000305992	0.384897	Yes	-1.37746
2256	21.3561	2.49	PF00734:Cellulose-binding region, fungal ; PF03443:Glycoside hydrolase, family 61 ;	GO:0005576-extracellular region ; GO:0004553-hydrolase activity, hydrolyzing O-glycosyl compounds ; GO:0005975-carbohydrate metabolic process ; GO:0030248-cellulose binding ;	Down	1.82321e-12	0.116594	Yes	-3.10043
2269	43.7146	17.4254			Down	0.000428358	0.398617	Yes	-1.32692
2276	4.89125	1.9997	PF00172:Fungal transcriptional regulatory protein, N-terminal ; PF00096:Zn-finger, C2H2 type ;	GO:0005488-binding ; GO:0003676-nucleic acid binding ; GO:0008270-zinc ion binding ; GO:0003700-transcription factor activity ; GO:0005622-intracellular ; GO:0006355-regulation of transcription, DNA-dependent ; GO:0005634-nucleus ;	Down	0.00303284	0.408832	Yes	-1.29042
2334	29.5414	8.08793			Down	1.98035e-07	0.273783	Yes	-1.8689
2347	24.1425	6.90859	PF01565:FAD linked oxidase, N-terminal ;	GO:0050660-FAD binding ; GO:0016491-oxidoreductase activity ;	Down	7.60288e-07	0.286159	Yes	-1.80511
2348	33.0254	13.8026			Down	0.00088359	0.417939	Yes	-1.25864
2414	39.3566	18.3225			Down	0.0263887	0.465551	Yes	-1.10299
2416	2.17794	0.80443			Down	0.0255276	0.369354	Yes	-1.43693
2424	1.61605	0.563241	PF02156:Glycoside hydrolase, family 26 ;	GO:0016985-mannan endo-1,4-beta-mannosidase activity ; GO:0006080-substituted mannan metabolic process ;	Down	0.0421647	0.348529	Yes	-1.52065
2510	8.52871	4.20726			Down	0.0395414	0.493306	Yes	-1.01945
2512	29.0406	10.6621	PF02347:Glycine cleavage system P-protein ;	GO:0006544-glycine metabolic process ; GO:0004374-glycine cleavage system ; GO:0004375-glycine dehydrogenase (decarboxylating) activity ; GO:0016887-ATPase activity ; GO:0005524-ATP binding ;	Down	5.578e-05	0.367145	Yes	-1.44558
2518	5.79374	2.67274			Down	0.0195326	0.461315	Yes	-1.11618
2519	74.7788	33.1491	PF03810:Importin-beta, N-terminal ;	GO:0000059-protein import into nucleus, docking ; GO:0006886-intracellular protein transport ; GO:0008565-protein transporter activity ; GO:0005737-cytoplasm ; GO:0005643-nuclear pore ; GO:0005634-nucleus ;	Down	0.00220845	0.443295	Yes	-1.17366
2585	10.5497	4.78836	PF02005:N2,N2-dimethylguanosine tRNA methyltransferase ;	GO:0004809-tRNA (guanine-N2-)-methyltransferase activity ; GO:0003723-RNA binding ; GO:0008033-tRNA processing ;	Down	0.00637194	0.453886	Yes	-1.1396
2591	23.066	7.61615	PF04427:Brix ;		Down	3.43182e-05	0.330189	Yes	-1.59863
2593	24.7182	11.0185	PF03006:Hly-III related proteins ;	GO:0016021-integral to membrane ;	Down	0.00526969	0.445765	Yes	-1.16565
2603	15.2617	5.02896			Down	0.000160304	0.329515	Yes	-1.60158
2614	32.5452	15.3208		GO:0009573-chloroplast ribulose bisphosphate carboxylase complex ; GO:0016984-ribulose-bisphosphate carboxylase activity ; GO:0015977-carbon utilization by fixation of carbon dioxide ;	Down	0.00917176	0.470755	Yes	-1.08695
2657	11.8842	3.56832			Down	0.000159851	0.300257	Yes	-1.73573
2662	199.176	93.9128		GO:0016491-oxidoreductase activity ;	Down	0.0295845	0.471507	Yes	-1.08465
2663	100.723	36.9942		GO:0016787-hydrolase activity ; GO:0008152-metabolic process ;	Down	4.31363e-05	0.367287	Yes	-1.44502	0.6
2674	29.9964	12.9112			Down	0.00163483	0.430425	Yes	-1.21617
2710	94.2391	38.7869	PF02854:Initiation factor eIF-4 gamma, middle ;	GO:0016070-RNA metabolic process ; GO:0005515-protein binding ;	Down	0.000686188	0.41158	Yes	-1.28076
2711	66.8611	24.5787		GO:0004402-histone acetyltransferase activity ;	Down	0.000449868	0.367608	Yes	-1.44376
2724	23.6306	2.38787	PF05199:GMC oxidoreductase ; PF00732:Glucose-methanol-choline oxidoreductase ;	GO:0008812-choline dehydrogenase activity ; GO:0016614-oxidoreductase activity, acting on CH-OH group of donors ; GO:0050660-FAD binding ;	Down	0	0.10105	Yes	-3.30686
2725	2.92189	1.14081		GO:0005634-nucleus ;	Down	0.00684574	0.390436	Yes	-1.35684
2751	7.28902	2.4488		GO:0004812-aminoacyl-tRNA ligase activity ; GO:0005737-cytoplasm ; GO:0006412-translation ; GO:0000166-nucleotide binding ; GO:0006418-tRNA aminoacylation for protein translation ; GO:0005524-ATP binding ;	Down	0.00255689	0.335957	Yes	-1.57365
2763	2.74451	0.885874			Down	0.00434419	0.32278	Yes	-1.63138
2767	17.479	8.51087			Down	0.0287946	0.48692	Yes	-1.03824
2782	4.73678	1.86054	PF00324:Amino acid permease-associated region ;	GO:0006810-transport ; GO:0016020-membrane ; GO:0015171-amino acid transmembrane transporter activity ; GO:0006865-amino acid transport ;	Down	0.0060565	0.392786	Yes	-1.34819
2816	923.65	369.788	PF00012:Heat shock protein Hsp70 ;	GO:0005524-ATP binding ;	Down	0.00342923	0.400355	Yes	-1.32065
2821	16.3016	7.67876			Down	0.0103715	0.471043	Yes	-1.08607
2897	192.495	70.5365		GO:0004338-glucan 1,3-beta-glucosidase activity ;	Down	3.29973e-05	0.366433	Yes	-1.44838
2904	8.62627	4.03976	PF00271:Helicase, C-terminal ; PF00270:DEAD/DEAH box helicase, N-terminal ; PF04408:Helicase-associated region ;	GO:0042625-ATPase activity, coupled to transmembrane movement of ions ; GO:0042626-ATPase activity, coupled to transmembrane movement of substances ; GO:0003676-nucleic acid binding ; GO:0004004-ATP-dependent RNA helicase activity ; GO:0017116-single-stranded DNA-dependent ATP-dependent DNA helicase activity ; GO:0008026-ATP-dependent helicase activity ; GO:0015462-protein-transmembrane transport…	Down	0.0106179	0.468309	Yes	-1.09447
2905	41.8749	16.5432	PF00400:G-protein beta WD-40 repeat ;		Down	0.000305957	0.395062	Yes	-1.33985
2908	27.4663	10.6305	PF00400:G-protein beta WD-40 repeat ; PF04003:Dip2/Utp12 ;	GO:0032040-small subunit processome ; GO:0006364-rRNA processing ;	Down	0.000187567	0.387038	Yes	-1.36945
2929	11.5301	5.55514	PF01426:Bromo adjacent region ;	GO:0003677-DNA binding ; GO:0004308-exo-alpha-sialidase activity ;	Down	0.0242479	0.481795	Yes	-1.05351
2930	14.5507	7.26178	PF00628:Zn-finger-like, PHD finger ;	GO:0008270-zinc ion binding ; GO:0005515-protein binding ;	Down	0.0354755	0.499067	Yes	-1.00269
2965	29.5547	13.3383	PF02889:Sec63 ; PF00271:Helicase, C-terminal ; PF00270:DEAD/DEAH box helicase, N-terminal ; PF04851:Type III restriction enzyme, res subunit ;	GO:0008796-bis(5'-nucleosyl)-tetraphosphatase activity ; GO:0008413-8-oxo-7,8-dihydroguanine triphosphatase activity ; GO:0019177-dihydroneopterin triphosphate pyrophosphohydrolase activity ; GO:0008758-UDP-2,3-diacylglucosamine hydrolase activity ; GO:0004787-thiamin-pyrophosphatase activity ; GO:0003676-nucleic acid binding ; GO:0000810-diacylglycerol pyrophosphate phosphatase activity ; GO:000…	Down	0.0035409	0.451309	Yes	-1.14781
2975	27.1636	9.1691	PF05127:Putative ATPase DUF699 ;		Down	1.67142e-05	0.337551	Yes	-1.56682
2980	14.8916	6.68191	PF01137:RNA 3'-terminal phosphate cyclase ;	GO:0003963-RNA-3'-phosphate cyclase activity ;	Down	0.00946146	0.448703	Yes	-1.15617
2984	1.09563	0.216286	PF06985:Heterokaryon incompatibility ;		Down	0.00338534	0.197408	Yes	-2.34075
3033	18.4761	7.1581			Down	0.000732658	0.387425	Yes	-1.36801
3046	94.4459	17.6063		GO:0016021-integral to membrane ; GO:0016020-membrane ; GO:0005215-transporter activity ; GO:0008643-carbohydrate transport ; GO:0006810-transport ; GO:0005351-sugar:hydrogen symporter activity ;	Down	1.33864e-11	0.186417	Yes	-2.4234
3064	2.24326	0.612028		GO:0008413-8-oxo-7,8-dihydroguanine triphosphatase activity ; GO:0008796-bis(5'-nucleosyl)-tetraphosphatase activity ; GO:0004787-thiamin-pyrophosphatase activity ; GO:0000810-diacylglycerol pyrophosphate phosphatase activity ; GO:0008758-UDP-2,3-diacylglucosamine hydrolase activity ; GO:0008828-dATP pyrophosphohydrolase activity ; GO:0043141-ATP-dependent 5'-3' DNA helicase activity ; GO:0019177…	Down	0.00152547	0.27283	Yes	-1.87393
3077	7.97032	2.47885	PF00734:Cellulose-binding region, fungal ; PF00331:Glycoside hydrolase, family 10 ;	GO:0005576-extracellular region ; GO:0004553-hydrolase activity, hydrolyzing O-glycosyl compounds ; GO:0005975-carbohydrate metabolic process ; GO:0030248-cellulose binding ;	Down	0.000201792	0.31101	Yes	-1.68497
3078	32.2597	15.7379	PF00171:Aldehyde dehydrogenase ;	GO:0004029-aldehyde dehydrogenase (NAD) activity ;	Down	0.00938551	0.48785	Yes	-1.03549
3079	19.2849	4.82905			Down	5.14166e-05	0.250406	Yes	-1.99766
3085	10.5249	4.58964			Down	0.0141545	0.436074	Yes	-1.19735
3147	40.8761	16.4585	PF00076:RNA-binding region RNP-1 (RNA recognition motif) ;	GO:0003676-nucleic acid binding ;	Down	0.000346484	0.402644	Yes	-1.31242
3157	22.815	8.64277			Down	0.000154586	0.37882	Yes	-1.40042
3162	6.95156	2.85139			Down	0.00240535	0.41018	Yes	-1.28567
3163	6.45426	1.50558	PF00445:Ribonuclease T2 ;	GO:0004521-endoribonuclease activity ; GO:0003723-RNA binding ; GO:0033897-ribonuclease T2 activity ;	Down	8.30556e-05	0.233269	Yes	-2.09993
3191	47.5516	19.7998			Down	0.00248643	0.416386	Yes	-1.26401
3192	48.5436	20.1459	PF01794:Ferric reductase-like transmembrane component ;	GO:0016020-membrane ; GO:0006118-electron transport ; GO:0016491-oxidoreductase activity ;	Down	0.000834409	0.415006	Yes	-1.26879
3207	14.6333	6.86472	PF00271:Helicase, C-terminal ; PF00270:DEAD/DEAH box helicase, N-terminal ;	GO:0008796-bis(5'-nucleosyl)-tetraphosphatase activity ; GO:0008413-8-oxo-7,8-dihydroguanine triphosphatase activity ; GO:0019177-dihydroneopterin triphosphate pyrophosphohydrolase activity ; GO:0008758-UDP-2,3-diacylglucosamine hydrolase activity ; GO:0004787-thiamin-pyrophosphatase activity ; GO:0003676-nucleic acid binding ; GO:0000810-diacylglycerol pyrophosphate phosphatase activity ; GO:000…	Down	0.00673323	0.469116	Yes	-1.09198
3210	231.921	86.8577	PF00535:Glycosyl transferase, family 2 ;		Down	5.32036e-05	0.374514	Yes	-1.41691
3257	691.602	94.696			Down	0	0.136923	Yes	-2.86857
3263	14.7293	5.17255	PF00646:Cyclin-like F-box ;		Down	0.000202447	0.351174	Yes	-1.50974
3300	25.9228	11.6465	PF00096:Zn-finger, C2H2 type ;	GO:0008270-zinc ion binding ; GO:0003676-nucleic acid binding ; GO:0005622-intracellular ;	Down	0.00551436	0.449276	Yes	-1.15433
3306	84.3112	33.6934	PF02786:Carbamoyl-phosphate synthase L chain, ATP-binding ; PF00289:Carbamoyl-phosphate synthetase large chain, N-terminal ; PF02787:Carbamoyl-phosphate synthetase large chain, oligomerisation ;	GO:0004086-carbamoyl-phosphate synthase activity ; GO:0006807-nitrogen compound metabolic process ; GO:0003824-catalytic activity ; GO:0008152-metabolic process ; GO:0004088-carbamoyl-phosphate synthase (glutamine-hydrolyzing) activity ; GO:0005524-ATP binding ;	Down	0.000305992	0.399631	Yes	-1.32326
3310	5.63091	2.66349			Down	0.0307237	0.473012	Yes	-1.08005
3322	44.3231	20.629	PF01000:RNA polymerase, insert ; PF01193:RNA polymerase, dimerisation ;	GO:0003899-DNA-directed RNA polymerase activity ; GO:0003902-DNA-directed RNA polymerase III activity ; GO:0003900-DNA-directed RNA polymerase I activity ; GO:0006350-transcription ; GO:0003901-DNA-directed RNA polymerase II activity ; GO:0034062-RNA polymerase activity ; GO:0046983-protein dimerization activity ; GO:0003677-DNA binding ; GO:0005634-nucleus ;	Down	0.00492878	0.465423	Yes	-1.10338
3348	15.7889	4.67184	PF04147:Nop14-like protein ;		Down	3.33752e-06	0.295894	Yes	-1.75685
3361	6.11171	2.92037	PF00069:Protein kinase ;	GO:0004713-protein-tyrosine kinase activity ; GO:0005524-ATP binding ; GO:0006468-protein amino acid phosphorylation ; GO:0004674-protein serine/threonine kinase activity ; GO:0004672-protein kinase activity ;	Down	0.0210114	0.477832	Yes	-1.06542
3375	0.744668	0.0613345			Down	0.031581	0.0823649	Yes	-3.60183
3390	26.6155	11.7507	PF00076:RNA-binding region RNP-1 (RNA recognition motif) ;	GO:0003676-nucleic acid binding ;	Down	0.00266402	0.441498	Yes	-1.17952
3484	75.9193	13.3391			Down	3.12268e-05	0.175701	Yes	-2.50881
3487	3.90274	0.700624			Down	0.000142401	0.179521	Yes	-2.47778
3493	45.5366	20.1167	PF00069:Protein kinase ;	GO:0019199-transmembrane receptor protein kinase activity ; GO:0004871-signal transducer activity ; GO:0034211-GTP-dependent protein kinase activity ; GO:0004704-NF-kappaB-inducing kinase activity ; GO:0004698-calcium-dependent protein kinase C activity ; GO:0004690-cyclic nucleotide-dependent protein kinase activity ; GO:0004706-JUN kinase kinase kinase activity ; GO:0004708-MAP kinase kinase ac…	Down	0.00533036	0.44177	Yes	-1.17863
3494	75.0011	33.4615	PF00069:Protein kinase ;	GO:0005524-ATP binding ; GO:0006468-protein amino acid phosphorylation ; GO:0004674-protein serine/threonine kinase activity ; GO:0004672-protein kinase activity ;	Down	0.00923703	0.446147	Yes	-1.16441
3513	108.437	49.8118	PF00098:Zn-finger, CCHC type ;	GO:0003676-nucleic acid binding ; GO:0008270-zinc ion binding ;	Down	0.00425362	0.459362	Yes	-1.1223
3526	19.728	9.25676			Down	0.0106195	0.469219	Yes	-1.09167
3539	75.1775	36.056			Down	0.00519479	0.479612	Yes	-1.06006
3635	3.1128	0.207671	PF01083:Cutinase ;	GO:0016787-hydrolase activity ; GO:0008152-metabolic process ;	Down	0.00655351	0.0667152	Yes	-3.90584
3640	24.1145	10.0968			Down	0.00316795	0.418702	Yes	-1.256
3649	91.7939	43.3166			Down	0.00697378	0.47189	Yes	-1.08348
3695	2.6701	0.692873			Down	0.00771438	0.259493	Yes	-1.94623
3707	4.08275	1.66585	PF07519:Tannase and feruloyl esterase ;		Down	0.0112714	0.408022	Yes	-1.29328
3734	9.23879	4.02503	PF04082:Fungal specific transcription factor ;	GO:0008270-zinc ion binding ; GO:0003677-DNA binding ; GO:0006350-transcription ; GO:0005634-nucleus ;	Down	0.00437538	0.435666	Yes	-1.1987
3754	2.64748	0.624369	PF01565:FAD linked oxidase, N-terminal ;	GO:0050660-FAD binding ; GO:0016491-oxidoreductase activity ;	Down	0.000923626	0.235835	Yes	-2.08415
3768	10.4949	1.73086	PF00544:Pectate lyase/Amb allergen ;		Down	1.22056e-08	0.164924	Yes	-2.60013
3792	46.0878	14.0301	PF00076:RNA-binding region RNP-1 (RNA recognition motif) ;	GO:0003906-DNA-(apurinic or apyrimidinic site) lyase activity ; GO:0003676-nucleic acid binding ;	Down	1.99179e-06	0.304421	Yes	-1.71586
3793	4.59847	1.10333			Down	0.00651756	0.239934	Yes	-2.05929
3814	72.9746	34.8273	PF00330:Aconitate hydratase, N-terminal ; PF00694:Aconitate hydratase, C-terminal ;	GO:0006099-tricarboxylic acid cycle ; GO:0003994-aconitate hydratase activity ; GO:0008152-metabolic process ; GO:0051539-4 iron, 4 sulfur cluster binding ;	Down	0.00519479	0.477252	Yes	-1.06718
3860	129.956	47.4458	PF01063:Aminotransferase, class IV ;	GO:0004084-branched-chain-amino-acid transaminase activity ; GO:0003824-catalytic activity ; GO:0008152-metabolic process ;	Down	4.69275e-05	0.365091	Yes	-1.45367
3889	18.9782	8.16438	PF03456:uDENN ; PF03455:dDENN ; PF02141:DENN ;	GO:0007242-intracellular signaling cascade ;	Down	0.00317429	0.430198	Yes	-1.21693
3898	4.51221	2.23799	PF04082:Fungal specific transcription factor ;	GO:0008270-zinc ion binding ; GO:0003677-DNA binding ; GO:0006350-transcription ; GO:0005634-nucleus ;	Down	0.0428247	0.495985	Yes	-1.01163
3913	61.2634	20.0497			Down	1.15069e-05	0.32727	Yes	-1.61144
3925	10.2702	3.19301			Down	1.04234e-05	0.3109	Yes	-1.68548
3985	9.87121	3.30009	PF01565:FAD linked oxidase, N-terminal ;	GO:0050660-FAD binding ; GO:0016491-oxidoreductase activity ;	Down	0.000160304	0.334315	Yes	-1.58072
3986	2.69192	0.29349			Down	0.000982372	0.109026	Yes	-3.19725
4007	2.98598	0.94571			Down	0.00445441	0.316717	Yes	-1.65873
4054	5.8393	0.7127	PF00734:Cellulose-binding region, fungal ;	GO:0005576-extracellular region ; GO:0004553-hydrolase activity, hydrolyzing O-glycosyl compounds ; GO:0005975-carbohydrate metabolic process ; GO:0030248-cellulose binding ;	Down	8.97386e-09	0.122052	Yes	-3.03443
4061	153.437	70.0673			Down	0.00323022	0.456652	Yes	-1.13083
4078	14.595	6.36199			Down	0.00723109	0.435902	Yes	-1.19792
4114	408.313	92.9466	PF00450:Peptidase S10, serine carboxypeptidase ;	GO:0006508-proteolysis ; GO:0004185-serine carboxypeptidase activity ; GO:0004187-carboxypeptidase D activity ;	Down	2.32179e-10	0.227636	Yes	-2.1352
4115	195.103	63.7925			Down	8.41519e-06	0.326968	Yes	-1.61278
4116	107.742	31.6804			Down	5.65247e-07	0.294039	Yes	-1.76592
4120	53.0888	25.2066	PF00295:Glycoside hydrolase, family 28 ;	GO:0005975-carbohydrate metabolic process ; GO:0004650-polygalacturonase activity ;	Down	0.0117959	0.474801	Yes	-1.07461
4147	25.6189	10.5345	PF00076:RNA-binding region RNP-1 (RNA recognition motif) ;	GO:0003676-nucleic acid binding ;	Down	0.00115771	0.4112	Yes	-1.28209
4161	57.3198	27.0492	PF00400:G-protein beta WD-40 repeat ;		Down	0.00476705	0.4719	Yes	-1.08345
4171	4.69695	1.97045	PF00067:Cytochrome P450 ;	GO:0018588-tri-n-butyltin dioxygenase activity ; GO:0018589-di-n-butyltin dioxygenase activity ; GO:0018592-4-nitrocatechol 4-monooxygenase activity ; GO:0018598-hydroxymethylsilanetriol oxidase activity ; GO:0018597-ammonia monooxygenase activity ; GO:0018591-methyl tertiary butyl ether 3-monooxygenase activity ; GO:0043823-spheroidene monooxygenase activity ; GO:0018585-fluorene oxygenase activ…	Down	0.011906	0.419517	Yes	-1.2532
4176	1.77621	0.382979	PF00067:Cytochrome P450 ;	GO:0006118-electron transport ; GO:0050381-unspecific monooxygenase activity ; GO:0004497-monooxygenase activity ; GO:0020037-heme binding ; GO:0005506-iron ion binding ;	Down	0.00502195	0.215616	Yes	-2.21346
4177	5.30782	1.07413			Down	0.000629387	0.202367	Yes	-2.30495
4235	3.40701	1.47604	PF00412:Zn-binding protein, LIM ;	GO:0008270-zinc ion binding ;	Down	0.0152215	0.433236	Yes	-1.20677
4301	2.55822	1.21811		GO:0004339-glucan 1,4-alpha-glucosidase activity ;	Down	0.0324939	0.476155	Yes	-1.0705
4302	9.49555	1.52479	PF05199:GMC oxidoreductase ; PF00732:Glucose-methanol-choline oxidoreductase ;	GO:0008812-choline dehydrogenase activity ; GO:0016614-oxidoreductase activity, acting on CH-OH group of donors ; GO:0050660-FAD binding ;	Down	1.54818e-10	0.160579	Yes	-2.63864
4330	5.34643	2.09529			Down	0.00902654	0.391905	Yes	-1.35143
4345	1135.84	447.481		GO:0003900-DNA-directed RNA polymerase I activity ; GO:0003902-DNA-directed RNA polymerase III activity ; GO:0003899-DNA-directed RNA polymerase activity ; GO:0034062-RNA polymerase activity ; GO:0003901-DNA-directed RNA polymerase II activity ;	Down	0.000136898	0.393965	Yes	-1.34386
4347	48.6653	23.6816			Down	0.0285675	0.486622	Yes	-1.03913
4348	21.2194	9.47195	PF00176:SNF2-related ;	GO:0042626-ATPase activity, coupled to transmembrane movement of substances ; GO:0016887-ATPase activity ; GO:0004004-ATP-dependent RNA helicase activity ; GO:0017116-single-stranded DNA-dependent ATP-dependent DNA helicase activity ; GO:0008026-ATP-dependent helicase activity ; GO:0015462-protein-transmembrane transporting ATPase activity ; GO:0008094-DNA-dependent ATPase activity ; GO:0004003-A…	Down	0.00379578	0.446382	Yes	-1.16365
4352	1321.81	654.975	PF00573:Ribosomal protein L4/L1e ;	GO:0005840-ribosome ; GO:0003735-structural constituent of ribosome ; GO:0005622-intracellular ; GO:0006412-translation ;	Down	0.0317474	0.495514	Yes	-1.013
4375	20.6495	8.60478		GO:0015078-hydrogen ion transmembrane transporter activity ; GO:0016469-proton-transporting two-sector ATPase complex ;	Down	0.00197752	0.416706	Yes	-1.2629
4381	9.3171	2.53282	PF00271:Helicase, C-terminal ; PF00270:DEAD/DEAH box helicase, N-terminal ;	GO:0008796-bis(5'-nucleosyl)-tetraphosphatase activity ; GO:0008413-8-oxo-7,8-dihydroguanine triphosphatase activity ; GO:0019177-dihydroneopterin triphosphate pyrophosphohydrolase activity ; GO:0008758-UDP-2,3-diacylglucosamine hydrolase activity ; GO:0004787-thiamin-pyrophosphatase activity ; GO:0003676-nucleic acid binding ; GO:0000810-diacylglycerol pyrophosphate phosphatase activity ; GO:000…	Down	9.15995e-06	0.271846	Yes	-1.87914
4394	13.6734	6.01382			Down	0.00533036	0.439819	Yes	-1.18502
4405	7.64569	2.40128	PF00628:Zn-finger-like, PHD finger ;	GO:0008270-zinc ion binding ; GO:0005515-protein binding ;	Down	1.43047e-05	0.31407	Yes	-1.67084
4423	40.9489	1.31733	PF00067:Cytochrome P450 ;	GO:0006118-electron transport ; GO:0004497-monooxygenase activity ; GO:0020037-heme binding ; GO:0005506-iron ion binding ;	Down	0	0.0321701	Yes	-4.95814
4424	11.4684	1.15728			Down	1.1294e-10	0.10091	Yes	-3.30885
4425	25.816	8.37711	PF00575:RNA binding S1 ;	GO:0004654-polyribonucleotide nucleotidyltransferase activity ; GO:0003723-RNA binding ; GO:0006396-RNA processing ; GO:0004553-hydrolase activity, hydrolyzing O-glycosyl compounds ; GO:0005975-carbohydrate metabolic process ; GO:0005622-intracellular ;	Down	7.2834e-06	0.324493	Yes	-1.62374
4431	24.0597	9.59974			Down	0.000329242	0.398997	Yes	-1.32555
4448	410.441	184.762			Down	0.00230288	0.450155	Yes	-1.15151
4484	48.2684	18.7984	PF05890:Eukaryotic rRNA processing ;		Down	0.000235028	0.389456	Yes	-1.36047
4554	2.98351	0.72986			Down	5.66658e-05	0.244631	Yes	-2.03132
4555	3.32881	0.640143	PF00096:Zn-finger, C2H2 type ;	GO:0008270-zinc ion binding ; GO:0003676-nucleic acid binding ; GO:0005622-intracellular ;	Down	0.00123904	0.192304	Yes	-2.37854
4556	0.976099	0.395657	PF00109:Beta-ketoacyl synthase ; PF02801:Beta-ketoacyl synthase ; PF00698:Acyl transferase region ;	GO:0031177-phosphopantetheine binding ; GO:0003824-catalytic activity ; GO:0008152-metabolic process ; GO:0009058-biosynthetic process ; GO:0016740-transferase activity ;	Down	0.00475167	0.405345	Yes	-1.30278
4590	8.38232	3.96633			Down	0.00729351	0.473178	Yes	-1.07954
4598	1907.24	485.439	PF00042:Globin ; PF00175:Oxidoreductase FAD/NAD(P)-binding ;	GO:0016491-oxidoreductase activity ; GO:0005506-iron ion binding ; GO:0020037-heme binding ; GO:0006118-electron transport ;	Down	2.66506e-06	0.254524	Yes	-1.97412
4606	4.0775	1.29572	PF00106:Short-chain dehydrogenase/reductase SDR ;	GO:0016491-oxidoreductase activity ; GO:0008152-metabolic process ;	Down	0.02173	0.317773	Yes	-1.65393
4611	113.248	39.4257	PF02458:Transferase ; PF00501:AMP-dependent synthetase and ligase ; PF05141:Pyoverdine biosynthesis ;	GO:0048037-cofactor binding ; GO:0003824-catalytic activity ; GO:0008152-metabolic process ;	Down	2.82083e-05	0.348136	Yes	-1.52228
4612	35.5649	10.2223			Down	1.15069e-05	0.287427	Yes	-1.79873
4613	131.316	61.918			Down	0.00465408	0.471519	Yes	-1.08461
4690	10.522	4.05161			Down	0.0013282	0.385061	Yes	-1.37684
4697	29.1686	14.2669			Down	0.0247983	0.489118	Yes	-1.03174
4753	19.9054	8.69285	PF07535:Zn-finger, DBF type ;	GO:0003676-nucleic acid binding ; GO:0008270-zinc ion binding ;	Down	0.00392384	0.436708	Yes	-1.19526
4766	50.2404	17.1398	PF05022:SRP40, C-terminal ;		Down	2.01095e-05	0.341156	Yes	-1.5515
4789	63.2392	14.0531			Down	1.54818e-10	0.222221	Yes	-2.16993
4798	5.57082	2.70653	PF00550:Phosphopantetheine-binding ; PF00668:Condensation domain ; PF00501:AMP-dependent synthetase and ligase ;	GO:0031177-phosphopantetheine binding ; GO:0048037-cofactor binding ; GO:0003824-catalytic activity ; GO:0008152-metabolic process ; GO:0016874-ligase activity ;	Down	0.0132009	0.485841	Yes	-1.04145
4819	180.345	72.9401		GO:0003824-catalytic activity ; GO:0008152-metabolic process ;	Down	0.00123546	0.404448	Yes	-1.30598
4820	234.816	83.3207			Down	0.000339314	0.354834	Yes	-1.49478
4913	12.6509	5.39806	PF00271:Helicase, C-terminal ; PF00270:DEAD/DEAH box helicase, N-terminal ;	GO:0008026-ATP-dependent helicase activity ; GO:0003676-nucleic acid binding ; GO:0004386-helicase activity ; GO:0005524-ATP binding ;	Down	0.00322785	0.426694	Yes	-1.22873
4932	74.8182	28.5018			Down	0.00898767	0.380947	Yes	-1.39234
4942	55.7309	16.9359	PF00658:Polyadenylate-binding protein/HECT-associated ; PF00076:RNA-binding region RNP-1 (RNA recognition motif) ;	GO:0003676-nucleic acid binding ; GO:0003723-RNA binding ; GO:0016071-mRNA metabolic process ;	Down	2.71706e-06	0.303887	Yes	-1.71839
4955	8.32898	3.39423			Down	0.014083	0.40752	Yes	-1.29506
5037	70.1028	31.8925	PF01189:Bacterial Fmu (Sun)/eukaryotic nucleolar NOL1/Nop2p ;		Down	0.00263472	0.454939	Yes	-1.13625
5063	24.9516	8.87097			Down	0.000303345	0.355527	Yes	-1.49197
5073	64.4941	9.17481	PF00450:Peptidase S10, serine carboxypeptidase ;	GO:0006508-proteolysis ; GO:0004185-serine carboxypeptidase activity ;	Down	0	0.142258	Yes	-2.81342
5087	10.8135	3.98878	PF00271:Helicase, C-terminal ; PF00270:DEAD/DEAH box helicase, N-terminal ;	GO:0008796-bis(5'-nucleosyl)-tetraphosphatase activity ; GO:0008413-8-oxo-7,8-dihydroguanine triphosphatase activity ; GO:0019177-dihydroneopterin triphosphate pyrophosphohydrolase activity ; GO:0008758-UDP-2,3-diacylglucosamine hydrolase activity ; GO:0004787-thiamin-pyrophosphatase activity ; GO:0003676-nucleic acid binding ; GO:0000810-diacylglycerol pyrophosphate phosphatase activity ; GO:000…	Down	0.000208123	0.36887	Yes	-1.43881
5095	22.0393	8.99781			Down	0.000557951	0.408262	Yes	-1.29243
5106	3.29833	1.50189	PF00109:Beta-ketoacyl synthase ; PF00107:Zinc-containing alcohol dehydrogenase superfamily ; PF00698:Acyl transferase region ; PF02801:Beta-ketoacyl synthase ;	GO:0016491-oxidoreductase activity ; GO:0003824-catalytic activity ; GO:0008152-metabolic process ; GO:0008270-zinc ion binding ; GO:0009058-biosynthetic process ; GO:0016740-transferase activity ;	Down	0.00957283	0.455349	Yes	-1.13496
5135	128.83	50.3352	PF03810:Importin-beta, N-terminal ;	GO:0000059-protein import into nucleus, docking ; GO:0016303-1-phosphatidylinositol-3-kinase activity ; GO:0006886-intracellular protein transport ; GO:0008565-protein transporter activity ; GO:0005737-cytoplasm ; GO:0015073-phosphatidylinositol 3-kinase, class I, regulator activity ; GO:0005643-nuclear pore ; GO:0015072-phosphatidylinositol 3-kinase, class I, catalyst activity ; GO:0005634-nucle…	Down	0.000136297	0.39071	Yes	-1.35583
5151	19.0337	9.17963			Down	0.0109394	0.482283	Yes	-1.05205
5160	408.252	194.613	PF01794:Ferric reductase-like transmembrane component ;	GO:0000293-ferric-chelate reductase activity ;	Down	0.00901481	0.476698	Yes	-1.06885
5178	7.03271	2.97065	PF00174:Oxidoreductase, molybdopterin binding ; PF03404:Mo-co oxidoreductase dimerisation domain ;	GO:0008482-sulfite oxidase activity ; GO:0030151-molybdenum ion binding ; GO:0006118-electron transport ; GO:0016491-oxidoreductase activity ;	Down	0.00569847	0.422405	Yes	-1.2433
5186	377.195	129.571	PF02752:Arrestin, C-terminal ;		Down	1.50806e-05	0.343512	Yes	-1.54157
5208	11.4583	3.09661	PF02386:Cation transporter ;	GO:0016021-integral to membrane ; GO:0008324-cation transmembrane transporter activity ; GO:0006508-proteolysis ; GO:0006813-potassium ion transport ; GO:0015079-potassium ion transmembrane transporter activity ; GO:0008270-zinc ion binding ; GO:0004182-carboxypeptidase A activity ; GO:0006812-cation transport ;	Down	1.28836e-06	0.27025	Yes	-1.88763
5218	12.4751	5.76896	PF05199:GMC oxidoreductase ; PF00732:Glucose-methanol-choline oxidoreductase ;	GO:0008812-choline dehydrogenase activity ; GO:0016614-oxidoreductase activity, acting on CH-OH group of donors ; GO:0050660-FAD binding ;	Down	0.00823412	0.462438	Yes	-1.11267
5221	53.2161	14.5313			Down	3.21585e-05	0.273062	Yes	-1.8727
5223	14.4684	5.91168			Down	0.0139465	0.408593	Yes	-1.29127
5242	25.6017	7.23914	PF00109:Beta-ketoacyl synthase ; PF00107:Zinc-containing alcohol dehydrogenase superfamily ; PF00698:Acyl transferase region ; PF02801:Beta-ketoacyl synthase ;	GO:0016491-oxidoreductase activity ; GO:0003824-catalytic activity ; GO:0008152-metabolic process ; GO:0008270-zinc ion binding ; GO:0009058-biosynthetic process ; GO:0016740-transferase activity ;	Down	1.09294e-07	0.28276	Yes	-1.82235
5250	16.3501	4.89558			Down	9.11699e-06	0.299422	Yes	-1.73975
5277	44.9966	18.108	PF01207:Dihydrouridine synthase, DuS ;	GO:0008033-tRNA processing ; GO:0043826-sulfur oxygenase reductase activity ; GO:0051341-regulation of oxidoreductase activity ; GO:0043738-F420H2 dehydrogenase activity ; GO:0050660-FAD binding ; GO:0043883-malolactic enzyme activity ; GO:0017150-tRNA dihydrouridine synthase activity ;	Down	0.00034911	0.40243	Yes	-1.31319
5307	10.2525	2.76681			Down	1.31633e-06	0.269867	Yes	-1.88968
5358	15.9257	4.29994	PF05285:SDA1 ;		Down	5.66655e-07	0.27	Yes	-1.88897
5400	4.54768	2.12374			Down	0.0214231	0.466994	Yes	-1.09852
5411	25.1123	11.8929	PF00271:Helicase, C-terminal ; PF00270:DEAD/DEAH box helicase, N-terminal ;	GO:0042625-ATPase activity, coupled to transmembrane movement of ions ; GO:0042626-ATPase activity, coupled to transmembrane movement of substances ; GO:0003676-nucleic acid binding ; GO:0004004-ATP-dependent RNA helicase activity ; GO:0017116-single-stranded DNA-dependent ATP-dependent DNA helicase activity ; GO:0008026-ATP-dependent helicase activity ; GO:0015462-protein-transmembrane transport…	Down	0.0053462	0.473589	Yes	-1.07829
5415	77.0606	25.3125	PF00083:General substrate transporter ;	GO:0016021-integral to membrane ; GO:0016020-membrane ; GO:0005215-transporter activity ; GO:0008643-carbohydrate transport ; GO:0006810-transport ; GO:0005351-sugar:hydrogen symporter activity ; GO:0008733-L-arabinose isomerase activity ;	Down	6.71123e-06	0.328475	Yes	-1.60614
5417	36.4531	16.8966			Down	0.00605816	0.463516	Yes	-1.10931
5458	4.52444	2.00938	PF00172:Fungal transcriptional regulatory protein, N-terminal ;	GO:0003700-transcription factor activity ; GO:0008270-zinc ion binding ; GO:0006355-regulation of transcription, DNA-dependent ; GO:0005634-nucleus ;	Down	0.0167691	0.444117	Yes	-1.17099
5514	108.73	19.7432	PF00544:Pectate lyase/Amb allergen ;		Down	1.22702e-11	0.18158	Yes	-2.46132
5538	11.4077	4.60786	PF06102:Protein of unknown function DUF947 ;		Down	0.00316741	0.403925	Yes	-1.30784
5539	25.1006	8.24175		GO:0016491-oxidoreductase activity ;	Down	3.93298e-05	0.328349	Yes	-1.6067
5548	11.7177	4.11023	PF00083:General substrate transporter ;	GO:0016021-integral to membrane ; GO:0006810-transport ; GO:0005215-transporter activity ;	Down	0.000262719	0.350771	Yes	-1.5114
5578	24.7445	11.0707	PF00753:Beta-lactamase-like ;	GO:0004416-hydroxyacylglutathione hydrolase activity ; GO:0016787-hydrolase activity ;	Down	0.00735466	0.4474	Yes	-1.16036
5595	27.122	10.3506			Down	0.000776638	0.381631	Yes	-1.38975
5631	7.19382	2.65789			Down	0.0218045	0.369469	Yes	-1.43648
5638	71.9916	35.2904			Down	0.00688876	0.490202	Yes	-1.02855
5717	992.233	465.655	PF03144:Elongation factor Tu, domain 2 ; PF00009:Protein synthesis factor, GTP-binding ;	GO:0005525-GTP binding ; GO:0008547-protein-synthesizing GTPase activity ; GO:0003924-GTPase activity ; GO:0006412-translation ;	Down	0.0302346	0.4693	Yes	-1.09142
5724	61.3306	30.2795	PF05383:RNA-binding protein Lupus Lal ; PF00076:RNA-binding region RNP-1 (RNA recognition motif) ;	GO:0042027-cyclophilin-type peptidyl-prolyl cis-trans isomerase activity ; GO:0030051-FK506-sensitive peptidyl-prolyl cis-trans isomerase ; GO:0003676-nucleic acid binding ; GO:0004600-cyclophilin ; GO:0003755-peptidyl-prolyl cis-trans isomerase activity ;	Down	0.00923703	0.49371	Yes	-1.01827
5759	14.0612	4.97688		GO:0004339-glucan 1,4-alpha-glucosidase activity ;	Down	0.000190872	0.353944	Yes	-1.49841
5764	3.04684	0.898624	PF00174:Oxidoreductase, molybdopterin binding ; PF03404:Mo-co oxidoreductase dimerisation domain ;	GO:0008482-sulfite oxidase activity ; GO:0030151-molybdenum ion binding ; GO:0006118-electron transport ; GO:0016491-oxidoreductase activity ;	Down	0.00154583	0.294936	Yes	-1.76152
5765	13.384	2.09219	PF00355:Rieske [2Fe-2S] region ; PF03460:Nitrite/sulfite reductase, hemoprotein beta-component, ferrodoxin-like ; PF00175:Oxidoreductase FAD/NAD(P)-binding ; PF00070:FAD-dependent pyridine nucleotide-disulphide oxidoreductase ; PF00970:Oxidoreductase FAD-binding region ; PF04324:BFD-like [2Fe-2S]-binding region ; PF00173:Cytochrome b5 ; PF01077:Nitrite and sulphite reductase 4Fe-4S region ;	GO:0009703-nitrate reductase (NADH) activity ; GO:0016491-oxidoreductase activity ; GO:0046914-transition metal ion binding ; GO:0051536-iron-sulfur cluster binding ; GO:0006118-electron transport ; GO:0020037-heme binding ; GO:0050660-FAD binding ;	Down	0	0.15632	Yes	-2.67742
5769	12.659	4.87618			Down	0.00213738	0.385195	Yes	-1.37634
5774	29.6677	10.2748			Down	3.8211e-05	0.34633	Yes	-1.52978
5784	87.6391	38.6306			Down	0.00357751	0.440792	Yes	-1.18183
5813	23.8093	6.6003			Down	3.8211e-05	0.277215	Yes	-1.85092
5831	30.3711	12.0912	PF02213:GYF ;	GO:0004339-glucan 1,4-alpha-glucosidase activity ;	Down	0.000465855	0.398115	Yes	-1.32874
5870	24.7046	8.61694	PF05178:Krr1 ;		Down	4.12788e-05	0.348799	Yes	-1.51953
5872	5.4522	2.23457			Down	0.0032796	0.409847	Yes	-1.28684
5875	142.384	68.9993			Down	0.00752704	0.4846	Yes	-1.04513
5886	3.49638	1.12811	PF01055:Glycoside hydrolase, family 31 ;	GO:0004553-hydrolase activity, hydrolyzing O-glycosyl compounds ; GO:0005975-carbohydrate metabolic process ;	Down	0.000480012	0.322651	Yes	-1.63195
5887	24.4261	3.27118			Down	6.11455e-09	0.133922	Yes	-2.90054
5919	19.7995	7.45895	PF04950:Protein of unknown function DUF663 ;	GO:0000166-nucleotide binding ; GO:0017111-nucleoside-triphosphatase activity ;	Down	0.000152439	0.376724	Yes	-1.40842
5922	8.29717	4.07057	PF02145:Rap/ran-GAP ;	GO:0005096-GTPase activator activity ; GO:0051056-regulation of small GTPase mediated signal transduction ; GO:0005622-intracellular ;	Down	0.0156196	0.490597	Yes	-1.02739
5959	9.36131	3.6466			Down	0.0167691	0.389539	Yes	-1.36016
6026	6.75062	2.88658			Down	0.0139838	0.427602	Yes	-1.22566
6038	26.4117	12.8909	PF04565:RNA polymerase Rpb2, domain 3 ; PF04563:RNA polymerase beta subunit ; PF04567:RNA polymerase Rpb2, domain 5 ; PF04560:RNA polymerase Rpb2, domain 7 ; PF00562:RNA polymerase Rpb2, domain 6 ; PF04566:RNA polymerase Rpb2, domain 4 ;	GO:0003899-DNA-directed RNA polymerase activity ; GO:0003902-DNA-directed RNA polymerase III activity ; GO:0003900-DNA-directed RNA polymerase I activity ; GO:0006350-transcription ; GO:0003901-DNA-directed RNA polymerase II activity ; GO:0034062-RNA polymerase activity ; GO:0003677-DNA binding ;	Down	0.00980479	0.488075	Yes	-1.03482
6042	8.89714	4.09622	PF00083:General substrate transporter ;	GO:0016021-integral to membrane ; GO:0006810-transport ; GO:0005215-transporter activity ;	Down	0.0138704	0.460397	Yes	-1.11905
6052	39.3203	13.3001	PF01645:Ferredoxin-dependent glutamate synthase ; PF04897:Glutamate synthase, amidotransferase region ; PF04898:Glutamate synthase, central ;	GO:0006807-nitrogen compound metabolic process ; GO:0015930-glutamate synthase activity ; GO:0016041-glutamate synthase (ferredoxin) activity ; GO:0006537-glutamate biosynthetic process ;	Down	5.16964e-05	0.33825	Yes	-1.56384
6053	63.2929	22.8088	PF00070:FAD-dependent pyridine nucleotide-disulphide oxidoreductase ; PF01493:Glutamate synthase, alpha subunit, C-terminal ;	GO:0016491-oxidoreductase activity ; GO:0006537-glutamate biosynthetic process ; GO:0008152-metabolic process ; GO:0006118-electron transport ; GO:0016639-oxidoreductase activity, acting on the CH-NH2 group of donors, NAD or NADP as acceptor ; GO:0050660-FAD binding ;	Down	0.000102765	0.360369	Yes	-1.47245
6071	5.64237	2.67719			Down	0.0237654	0.47448	Yes	-1.07558
6100	5347.08	1963.59			Down	0.000829199	0.367227	Yes	-1.44526
6101	478.06	157.498	PF00005:ABC transporter ;	GO:0000166-nucleotide binding ; GO:0017111-nucleoside-triphosphatase activity ; GO:0016887-ATPase activity ; GO:0005524-ATP binding ;	Down	0.000303345	0.329452	Yes	-1.60186
6103	34.3403	13.6053	PF00515:TPR repeat ;		Down	0.00024137	0.39619	Yes	-1.33573
6105	70.4905	23.79	PF02524:RepA / Rep+ protein KID ;		Down	4.34399e-05	0.337492	Yes	-1.56707
6126	18.69	1.99707	PF03443:Glycoside hydrolase, family 61 ;		Down	9.03468e-13	0.106852	Yes	-3.22631
6145	3.20059	1.40789			Down	0.0433123	0.439885	Yes	-1.1848
6199	53.2127	16.2995	PF00734:Cellulose-binding region, fungal ; PF00544:Pectate lyase/Amb allergen ;	GO:0005576-extracellular region ; GO:0004553-hydrolase activity, hydrolyzing O-glycosyl compounds ; GO:0005975-carbohydrate metabolic process ; GO:0030248-cellulose binding ;	Down	5.52499e-06	0.306308	Yes	-1.70694
6230	4.61322	1.82461	PF00249:Myb, DNA-binding ;	GO:0043773-coenzyme F420-0 gamma-glutamyl ligase activity ; GO:0018169-ribosomal S6-glutamic acid ligase activity ; GO:0043774-coenzyme F420-2 alpha-glutamyl ligase activity ; GO:0008766-UDP-N-acetylmuramoylalanyl-D-glutamyl-2,6-diaminopimelate-D-alanyl-D-alanine ligase activity ; GO:0003677-DNA binding ;	Down	0.00923703	0.395518	Yes	-1.33819
6256	110.715	15.2917			Down	0	0.138118	Yes	-2.85603
6257	15.4138	4.85078	PF00067:Cytochrome P450 ;	GO:0006118-electron transport ; GO:0050381-unspecific monooxygenase activity ; GO:0004497-monooxygenase activity ; GO:0020037-heme binding ; GO:0005506-iron ion binding ;	Down	4.67694e-05	0.314704	Yes	-1.66793
6258	5.30685	1.45549	PF05141:Pyoverdine biosynthesis ;		Down	2.53519e-05	0.274266	Yes	-1.86635
6259	97.0823	22.0076			Down	2.7282e-08	0.22669	Yes	-2.14121
6275	6.20269	1.10501		GO:0000166-nucleotide binding ; GO:0017111-nucleoside-triphosphatase activity ;	Down	3.86562e-10	0.17815	Yes	-2.48883
6330	27.7971	13.7079	PF00169:Pleckstrin-like ;		Down	0.0198933	0.493141	Yes	-1.01993
6407	22.5743	8.48347			Down	0.000235124	0.375802	Yes	-1.41195
6502	13.0293	6.40532		GO:0008305-integrin complex ; GO:0007155-cell adhesion ; GO:0004339-glucan 1,4-alpha-glucosidase activity ;	Down	0.0154571	0.491609	Yes	-1.02442
6504	20.7808	7.91595			Down	0.000277623	0.380926	Yes	-1.39242
6528	13.5894	4.6345	PF02535:Zinc transporter ZIP ;	GO:0016021-integral to membrane ; GO:0016020-membrane ; GO:0006829-zinc ion transport ; GO:0046873-metal ion transmembrane transporter activity ; GO:0005385-zinc ion transmembrane transporter activity ; GO:0030001-metal ion transport ;	Down	0.000275163	0.341038	Yes	-1.552
6580	9.32986	2.91942	PF00400:G-protein beta WD-40 repeat ;		Down	6.94572e-05	0.312911	Yes	-1.67617
6590	2.15245	0.810122	PF00248:Aldo/keto reductase ;	GO:0016491-oxidoreductase activity ;	Down	0.0237654	0.376372	Yes	-1.40977
6618	73.3276	19.2219	PF00324:Amino acid permease-associated region ;	GO:0006810-transport ; GO:0016020-membrane ; GO:0015171-amino acid transmembrane transporter activity ; GO:0006865-amino acid transport ;	Down	2.18488e-08	0.262137	Yes	-1.93161
6624	54.6134	24.5423			Down	0.014367	0.449382	Yes	-1.15398
6644	8.20041	2.60673			Down	0.00010387	0.317878	Yes	-1.65345
6658	1.69585	0.290162	PF00194:Carbonic anhydrase, eukaryotic ;	GO:0006730-one-carbon compound metabolic process ; GO:0008270-zinc ion binding ; GO:0004089-carbonate dehydratase activity ;	Down	0.0272654	0.171101	Yes	-2.54708
6663	15.064	6.7387		GO:0008270-zinc ion binding ;	Down	0.00465428	0.447338	Yes	-1.16056
6671	35.5892	11.3581	PF00533:BRCT ; PF06732:Pescadillo, N-terminal ;	GO:0005730-nucleolus ; GO:0005622-intracellular ; GO:0008283-cell proliferation ;	Down	5.52499e-06	0.319145	Yes	-1.64772
6695	7.80379	2.12056			Down	0.0029817	0.271735	Yes	-1.87973
6697	11.8259	4.45724	PF00107:Zinc-containing alcohol dehydrogenase superfamily ;	GO:0008270-zinc ion binding ; GO:0003939-L-iditol 2-dehydrogenase activity ; GO:0016491-oxidoreductase activity ;	Down	0.00126508	0.376905	Yes	-1.40773
6702	4.20312	1.19929	PF05577:Peptidase S28 ;	GO:0008236-serine-type peptidase activity ; GO:0006508-proteolysis ; GO:0008234-cysteine-type peptidase activity ;	Down	5.48838e-05	0.285333	Yes	-1.80928
6745	26.7419	8.49937	PF00400:G-protein beta WD-40 repeat ;		Down	3.0887e-06	0.31783	Yes	-1.65367
6746	120.104	53.325	PF00134:Cyclin, N-terminal ; PF02984:Cyclin, C-terminal ;	GO:0004812-aminoacyl-tRNA ligase activity ; GO:0005737-cytoplasm ; GO:0006412-translation ; GO:0000166-nucleotide binding ; GO:0005634-nucleus ; GO:0006418-tRNA aminoacylation for protein translation ; GO:0005524-ATP binding ;	Down	0.00255689	0.44399	Yes	-1.1714
6758	124.869	51.1648		GO:0004568-chitinase activity ; GO:0008843-endochitinase activity ;	Down	0.000939016	0.409748	Yes	-1.28719
6759	459.56	223.044			Down	0.0181979	0.485343	Yes	-1.04292
6767	8.70924	3.91581		GO:0016021-integral to membrane ; GO:0006810-transport ; GO:0005215-transporter activity ;	Down	0.0197752	0.449616	Yes	-1.15324
6814	37.2494	11.7677	PF01965:ThiJ/PfpI ;		Down	7.62067e-05	0.315916	Yes	-1.66238
6874	22.3613	6.73206			Down	1.91506e-05	0.301059	Yes	-1.73188
6877	27.6876	8.35445			Down	2.94071e-06	0.30174	Yes	-1.72862
6878	10.6024	4.7545	PF00018:SH3 ;	GO:0003677-DNA binding ;	Down	0.00580641	0.448436	Yes	-1.15703
6879	53.032	22.3013	PF04145:Ctr copper transporter ;	GO:0016021-integral to membrane ; GO:0006825-copper ion transport ; GO:0005375-copper ion transmembrane transporter activity ;	Down	0.00400852	0.420525	Yes	-1.24974
6880	26.7784	8.01653			Down	0.000156449	0.299366	Yes	-1.74002
6898	43.2116	18.0428			Down	0.00103458	0.417545	Yes	-1.26
6918	25.0857	7.38975			Down	2.81067e-05	0.29458	Yes	-1.76327
6928	10.3101	4.61406			Down	0.0463716	0.447528	Yes	-1.15995
6962	57.6315	20.5834	PF02882:Tetrahydrofolate dehydrogenase/cyclohydrolase ; PF01268:Formate-tetrahydrofolate ligase, FTHFS ; PF00763:Tetrahydrofolate dehydrogenase/cyclohydrolase ;	GO:0003824-catalytic activity ; GO:0009396-folic acid and derivative biosynthetic process ; GO:0004329-formate-tetrahydrofolate ligase activity ; GO:0005524-ATP binding ;	Down	3.29335e-05	0.357155	Yes	-1.48538
6971	432.494	214.954			Down	0.0314689	0.49701	Yes	-1.00865
6977	8.35518	3.82016	PF01302:CAP-Gly ;		Down	0.00793477	0.457221	Yes	-1.12904
6995	25.7319	12.6999	PF00335:CD9/CD37/CD63 antigen ;	GO:0016021-integral to membrane ;	Down	0.0251728	0.493547	Yes	-1.01874
7007	9.7683	3.37537	PF01565:FAD linked oxidase, N-terminal ;	GO:0050660-FAD binding ; GO:0005783-endoplasmic reticulum ; GO:0016491-oxidoreductase activity ;	Down	0.00026252	0.345543	Yes	-1.53306
7015	4.02795	0.649436			Down	4.24618e-06	0.161232	Yes	-2.63279
7020	92.4362	39.6021	PF04145:Ctr copper transporter ;	GO:0016021-integral to membrane ; GO:0006825-copper ion transport ; GO:0005375-copper ion transmembrane transporter activity ;	Down	0.00227939	0.428426	Yes	-1.22288
7021	39.9294	11.3948	PF01794:Ferric reductase-like transmembrane component ;		Down	3.41564e-07	0.285374	Yes	-1.80908
7025	4.76185	2.20008		GO:0003824-catalytic activity ; GO:0046872-metal ion binding ;	Down	0.0106179	0.462022	Yes	-1.11397
7076	7.57639	3.24495		GO:0004339-glucan 1,4-alpha-glucosidase activity ;	Down	0.00588	0.428298	Yes	-1.22331
7077	13.5413	3.60332	PF00264:Tyrosinase ;	GO:0016491-oxidoreductase activity ; GO:0008152-metabolic process ;	Down	4.24618e-06	0.266099	Yes	-1.90997
7099	6.01334	2.90975			Down	0.021144	0.483883	Yes	-1.04727
7102	1.25613	0.522142		GO:0003677-DNA binding ;	Down	0.0416371	0.415675	Yes	-1.26647
7106	10.3806	5.00262	PF00083:General substrate transporter ;	GO:0016021-integral to membrane ; GO:0016020-membrane ; GO:0005215-transporter activity ; GO:0008643-carbohydrate transport ; GO:0006810-transport ; GO:0005351-sugar:hydrogen symporter activity ;	Down	0.018908	0.48192	Yes	-1.05313
7131	52.7493	11.5628			Down	1.86834e-09	0.219203	Yes	-2.18966
7137	54.0988	25.035	PF00271:Helicase, C-terminal ; PF00270:DEAD/DEAH box helicase, N-terminal ;	GO:0008796-bis(5'-nucleosyl)-tetraphosphatase activity ; GO:0008413-8-oxo-7,8-dihydroguanine triphosphatase activity ; GO:0019177-dihydroneopterin triphosphate pyrophosphohydrolase activity ; GO:0008758-UDP-2,3-diacylglucosamine hydrolase activity ; GO:0004787-thiamin-pyrophosphatase activity ; GO:0003676-nucleic acid binding ; GO:0000810-diacylglycerol pyrophosphate phosphatase activity ; GO:000…	Down	0.00334192	0.462764	Yes	-1.11165
7154	1455.2	701.821	PF00318:Ribosomal protein S2 ;	GO:0005840-ribosome ; GO:0003735-structural constituent of ribosome ; GO:0005622-intracellular ; GO:0015935-small ribosomal subunit ; GO:0006412-translation ;	Down	0.0210584	0.482285	Yes	-1.05204
7196	73.2437	27.1786		GO:0004812-aminoacyl-tRNA ligase activity ; GO:0006429-leucyl-tRNA aminoacylation ; GO:0003700-transcription factor activity ; GO:0006412-translation ; GO:0000166-nucleotide binding ; GO:0043565-sequence-specific DNA binding ; GO:0006418-tRNA aminoacylation for protein translation ; GO:0005737-cytoplasm ; GO:0004823-leucine-tRNA ligase activity ; GO:0006355-regulation of transcription, DNA-depend…	Down	8.7759e-05	0.371071	Yes	-1.43023
7228	26.408	3.64167	PF00067:Cytochrome P450 ;	GO:0006118-electron transport ; GO:0004497-monooxygenase activity ; GO:0020037-heme binding ; GO:0005506-iron ion binding ;	Down	0	0.1379	Yes	-2.8583
7250	4.6715	1.37284			Down	3.09755e-05	0.293876	Yes	-1.76672
7256	35.9321	16.9109	PF00632:HECT ;	GO:0051438-regulation of ubiquitin-protein ligase activity ; GO:0051440-regulation of ubiquitin-protein ligase activity during meiotic cell cycle ; GO:0004842-ubiquitin-protein ligase activity ; GO:0006464-protein modification process ; GO:0006512-ubiquitin cycle ; GO:0051444-negative regulation of ubiquitin-protein ligase activity ; GO:0051443-positive regulation of ubiquitin-protein ligase acti…	Down	0.0156196	0.470635	Yes	-1.08732
7257	28.1641	11.9894			Down	0.0138395	0.425698	Yes	-1.2321
7258	19.8978	8.60714	PF06025:Protein of unknown function DUF913 ; PF06012:Protein of unknown function DUF908 ;	GO:0051438-regulation of ubiquitin-protein ligase activity ; GO:0051440-regulation of ubiquitin-protein ligase activity during meiotic cell cycle ; GO:0004842-ubiquitin-protein ligase activity ; GO:0006512-ubiquitin cycle ; GO:0005737-cytoplasm ; GO:0051444-negative regulation of ubiquitin-protein ligase activity ; GO:0051028-mRNA transport ; GO:0051443-positive regulation of ubiquitin-protein li…	Down	0.00845837	0.432567	Yes	-1.209
7285	8.21154	3.62199	PF00082:Peptidase S8 and S53, subtilisin, kexin, sedolisin ;	GO:0004289-subtilase activity ; GO:0006508-proteolysis ; GO:0004285-proprotein convertase 1 activity ;	Down	0.00321209	0.441085	Yes	-1.18087
7318	402.292	154.545	PF01522:Polysaccharide deacetylase ; PF00187:Chitin-binding, type 1 ;	GO:0005975-carbohydrate metabolic process ; GO:0016810-hydrolase activity, acting on carbon-nitrogen (but not peptide) bonds ; GO:0008061-chitin binding ;	Down	0.000399267	0.384161	Yes	-1.38022
7319	691.296	307.125			Down	0.00129846	0.444274	Yes	-1.17048
7328	18.6683	5.83427		GO:0042027-cyclophilin-type peptidyl-prolyl cis-trans isomerase activity ; GO:0030051-FK506-sensitive peptidyl-prolyl cis-trans isomerase ; GO:0004600-cyclophilin ; GO:0003755-peptidyl-prolyl cis-trans isomerase activity ;	Down	1.37813e-05	0.312523	Yes	-1.67797
7349	196.174	72.7879			Down	0.0387355	0.371037	Yes	-1.43036
7350	28.2593	11.474			Down	0.000859465	0.406026	Yes	-1.30036
7432	37.0763	12.8465	PF00400:G-protein beta WD-40 repeat ;		Down	2.01095e-05	0.346488	Yes	-1.52912
7453	28.5716	12.6002	PF00106:Short-chain dehydrogenase/reductase SDR ; PF00550:Phosphopantetheine-binding ; PF00501:AMP-dependent synthetase and ligase ;	GO:0016491-oxidoreductase activity ; GO:0031177-phosphopantetheine binding ; GO:0003824-catalytic activity ; GO:0008152-metabolic process ; GO:0048037-cofactor binding ; GO:0004043-L-aminoadipate-semialdehyde dehydrogenase activity ; GO:0005949-aminoadipate-semialdehyde dehydrogenase complex ;	Down	0.00172009	0.441004	Yes	-1.18114
7478	12.8535	5.35479	PF00018:SH3 ;		Down	0.00268697	0.416602	Yes	-1.26326
7496	694.331	130.442	PF05221:S-adenosyl-L-homocysteine hydrolase ; PF00670:S-adenosyl-L-homocysteine hydrolase ;	GO:0006730-one-carbon compound metabolic process ; GO:0004013-adenosylhomocysteinase activity ;	Down	2.63511e-13	0.187867	Yes	-2.41222
7520	236.806	80.1496	PF00171:Aldehyde dehydrogenase ;	GO:0006561-proline biosynthetic process ; GO:0005759-mitochondrial matrix ; GO:0003842-1-pyrroline-5-carboxylate dehydrogenase activity ;	Down	6.09788e-06	0.338461	Yes	-1.56294
7521	52.1581	21.5309	PF01926:GTP-binding protein, HSR1-related ;	GO:0005525-GTP binding ; GO:0005622-intracellular ;	Down	0.000543717	0.412801	Yes	-1.27648
7524	12.3445	4.90207	PF00271:Helicase, C-terminal ; PF00270:DEAD/DEAH box helicase, N-terminal ;	GO:0008796-bis(5'-nucleosyl)-tetraphosphatase activity ; GO:0008413-8-oxo-7,8-dihydroguanine triphosphatase activity ; GO:0019177-dihydroneopterin triphosphate pyrophosphohydrolase activity ; GO:0008758-UDP-2,3-diacylglucosamine hydrolase activity ; GO:0004787-thiamin-pyrophosphatase activity ; GO:0003676-nucleic acid binding ; GO:0000810-diacylglycerol pyrophosphate phosphatase activity ; GO:000…	Down	0.0015656	0.397106	Yes	-1.33241
7527	25.986	10.0256	PF00271:Helicase, C-terminal ; PF00270:DEAD/DEAH box helicase, N-terminal ;	GO:0008796-bis(5'-nucleosyl)-tetraphosphatase activity ; GO:0008413-8-oxo-7,8-dihydroguanine triphosphatase activity ; GO:0019177-dihydroneopterin triphosphate pyrophosphohydrolase activity ; GO:0008758-UDP-2,3-diacylglucosamine hydrolase activity ; GO:0004787-thiamin-pyrophosphatase activity ; GO:0003676-nucleic acid binding ; GO:0000810-diacylglycerol pyrophosphate phosphatase activity ; GO:000…	Down	0.00017833	0.385808	Yes	-1.37405
7533	1.57318	0.537366	PF00860:Xanthine/uracil/vitamin C permease ;	GO:0006810-transport ; GO:0016020-membrane ; GO:0005215-transporter activity ;	Down	0.0226348	0.341579	Yes	-1.54971
7601	35.5955	15.675			Down	0.00235034	0.440365	Yes	-1.18323
7637	17.5894	7.21362			Down	0.00240943	0.410112	Yes	-1.28591
7647	30.8536	12.7677	PF00172:Fungal transcriptional regulatory protein, N-terminal ;	GO:0003700-transcription factor activity ; GO:0008270-zinc ion binding ; GO:0006355-regulation of transcription, DNA-dependent ; GO:0005634-nucleus ;	Down	0.000768177	0.413816	Yes	-1.27294
7659	30.4003	13.6278	PF05185:Skb1 methyltransferase ;	GO:0005737-cytoplasm ; GO:0008168-methyltransferase activity ;	Down	0.00353437	0.448278	Yes	-1.15753
7663	11.0008	2.94388	PF00067:Cytochrome P450 ;	GO:0006118-electron transport ; GO:0004497-monooxygenase activity ; GO:0020037-heme binding ; GO:0005506-iron ion binding ;	Down	3.84196e-06	0.267606	Yes	-1.90182
7695	11.5856	5.41824			Down	0.00915006	0.46767	Yes	-1.09644
7716	25.5598	10.9147			Down	0.00492924	0.427026	Yes	-1.2276
7719	42.9281	17.581	PF05383:RNA-binding protein Lupus Lal ;		Down	0.00151419	0.409545	Yes	-1.28791
7720	40.3977	12.6421		GO:0006265-DNA topological change ; GO:0005694-chromosome ; GO:0003918-DNA topoisomerase (ATP-hydrolyzing) activity ; GO:0003677-DNA binding ; GO:0005524-ATP binding ;	Down	5.00222e-05	0.312941	Yes	-1.67604
7753	15.3187	7.23968			Down	0.00835258	0.472604	Yes	-1.0813
7756	3.03242	1.11977			Down	0.0058535	0.369266	Yes	-1.43727
7758	3.63405	0.696704			Down	6.54501e-05	0.191716	Yes	-2.38296
7789	351.405	113.775	PF01565:FAD linked oxidase, N-terminal ;	GO:0050660-FAD binding ; GO:0016491-oxidoreductase activity ;	Down	6.1991e-06	0.323772	Yes	-1.62695
7791	24.3428	10.2239		GO:0042027-cyclophilin-type peptidyl-prolyl cis-trans isomerase activity ; GO:0030051-FK506-sensitive peptidyl-prolyl cis-trans isomerase ; GO:0004600-cyclophilin ; GO:0003755-peptidyl-prolyl cis-trans isomerase activity ;	Down	0.00130168	0.419997	Yes	-1.25155
7800	17.3505	8.03986	PF04179:Initiator tRNA phosphoribosyl transferase ;	GO:0016763-transferase activity, transferring pentosyl groups ;	Down	0.011218	0.463379	Yes	-1.10973
7827	7.67188	2.16181			Down	2.0765e-05	0.281784	Yes	-1.82734
7871	38.7321	13.1206	PF00172:Fungal transcriptional regulatory protein, N-terminal ;	GO:0003700-transcription factor activity ; GO:0008270-zinc ion binding ; GO:0006355-regulation of transcription, DNA-dependent ; GO:0005634-nucleus ;	Down	1.44459e-05	0.338753	Yes	-1.5617
7872	19.3194	5.91837	PF00536:Sterile alpha motif SAM ; PF00169:Pleckstrin-like ; PF07647:Sterile alpha motif homology 2 ;		Down	1.97943e-06	0.306343	Yes	-1.70678
7877	10.2939	4.68984			Down	0.0170992	0.455594	Yes	-1.13418
7884	18.3278	8.42867			Down	0.00375026	0.459884	Yes	-1.12066
7899	10.9593	0	PF00172:Fungal transcriptional regulatory protein, N-terminal ; PF04082:Fungal specific transcription factor ;	GO:0003700-transcription factor activity ; GO:0006350-transcription ; GO:0008270-zinc ion binding ; GO:0003677-DNA binding ; GO:0006355-regulation of transcription, DNA-dependent ; GO:0005634-nucleus ;	Down	4.27991e-40	0	Yes	#NUM!	0
7906	17.1983	6.6181			Down	0.00235034	0.384811	Yes	-1.37778
7920	27.7147	7.14133	PF00400:G-protein beta WD-40 repeat ;	GO:0000250-lanosterol synthase activity ;	Down	1.04208e-07	0.257673	Yes	-1.95639
7953	25.4235	11.6232	PF01585:D111/G-patch ;	GO:0003676-nucleic acid binding ; GO:0005622-intracellular ;	Down	0.0053859	0.457183	Yes	-1.12916
7958	64.5972	12.0966	PF00067:Cytochrome P450 ;	GO:0018588-tri-n-butyltin dioxygenase activity ; GO:0018589-di-n-butyltin dioxygenase activity ; GO:0018592-4-nitrocatechol 4-monooxygenase activity ; GO:0018598-hydroxymethylsilanetriol oxidase activity ; GO:0018597-ammonia monooxygenase activity ; GO:0018591-methyl tertiary butyl ether 3-monooxygenase activity ; GO:0043823-spheroidene monooxygenase activity ; GO:0018585-fluorene oxygenase activ…	Down	9.35809e-11	0.187262	Yes	-2.41687
7959	11.3396	1.05797			Down	7.44391e-11	0.0932987	Yes	-3.422
7961	1.74683	0.518213		GO:0016021-integral to membrane ; GO:0005215-transporter activity ; GO:0015904-tetracycline transport ; GO:0046677-response to antibiotic ; GO:0006810-transport ; GO:0015520-tetracycline:hydrogen antiporter activity ;	Down	0.00955407	0.296659	Yes	-1.75312
7980	19.421	8.20673	PF00860:Xanthine/uracil/vitamin C permease ;	GO:0006810-transport ; GO:0016020-membrane ; GO:0005215-transporter activity ;	Down	0.00163549	0.42257	Yes	-1.24274
7986	9.26676	2.50029	PF01565:FAD linked oxidase, N-terminal ;	GO:0050660-FAD binding ; GO:0016491-oxidoreductase activity ;	Down	4.25043e-06	0.269813	Yes	-1.88997
7990	27.5658	12.5818	PF04427:Brix ;		Down	0.00423448	0.456428	Yes	-1.13154
8015	114.928	56.6203			Down	0.0102842	0.492659	Yes	-1.02134
8025	30.272	4.65759			Down	0	0.153858	Yes	-2.70033
8048	125.856	12.804	PF00067:Cytochrome P450 ;	GO:0006118-electron transport ; GO:0004497-monooxygenase activity ; GO:0020037-heme binding ; GO:0005506-iron ion binding ;	Down	0	0.101735	Yes	-3.29711
8049	76.6924	9.82144	PF00067:Cytochrome P450 ;	GO:0006118-electron transport ; GO:0004497-monooxygenase activity ; GO:0020037-heme binding ; GO:0005506-iron ion binding ;	Down	0	0.128063	Yes	-2.96508
8065	36.8663	16.8401			Down	0.00666261	0.456788	Yes	-1.1304
8102	2.81629	0.836381	PF00750:Arginyl-tRNA synthetase, class Ic ; PF05746:Arginyl tRNA synthetase anticodon binding ;	GO:0005737-cytoplasm ; GO:0006412-translation ; GO:0000166-nucleotide binding ; GO:0004814-arginine-tRNA ligase activity ; GO:0006420-arginyl-tRNA aminoacylation ; GO:0005524-ATP binding ;	Down	8.16472e-05	0.29698	Yes	-1.75156
8156	47.7299	18.0507			Down	0.00012925	0.378184	Yes	-1.40284
8191	136.143	54.3805			Down	0.000268154	0.399437	Yes	-1.32396
8215	5.12871	1.7062	PF01761:3-dehydroquinate synthase ;	GO:0003856-3-dehydroquinate synthase activity ; GO:0009073-aromatic amino acid family biosynthetic process ;	Down	0.00215106	0.332676	Yes	-1.58781
8220	16.2578	4.83498	PF00400:G-protein beta WD-40 repeat ;	GO:0003847-1-alkyl-2-acetylglycerophosphocholine esterase activity ;	Down	2.32244e-06	0.297394	Yes	-1.74955
8230	1.60605	0.563029	PF01179:Copper amine oxidase ;	GO:0005507-copper ion binding ; GO:0009308-amine metabolic process ; GO:0008131-amine oxidase activity ; GO:0048038-quinone binding ;	Down	0.014558	0.350568	Yes	-1.51224
8245	10.2438	4.22359			Down	0.00423448	0.412307	Yes	-1.27821
8292	17.2431	8.43364		GO:0005509-calcium ion binding ;	Down	0.0143877	0.489102	Yes	-1.03179
8299	44.0418	19.8938	PF02786:Carbamoyl-phosphate synthase L chain, ATP-binding ; PF00289:Carbamoyl-phosphate synthetase large chain, N-terminal ; PF02785:Biotin carboxylase, C-terminal ;	GO:0003824-catalytic activity ; GO:0016874-ligase activity ; GO:0004485-methylcrotonoyl-CoA carboxylase activity ; GO:0008152-metabolic process ; GO:0005524-ATP binding ;	Down	0.00852327	0.451703	Yes	-1.14655
8314	19.7621	6.89632			Down	7.1105e-05	0.348967	Yes	-1.51884
8322	14.4521	5.83052			Down	0.00188533	0.403438	Yes	-1.30958
8334	11.9002	1.75678	PF03443:Glycoside hydrolase, family 61 ;		Down	1.40982e-07	0.147626	Yes	-2.75998
8339	20.1905	2.07293			Down	0	0.102669	Yes	-3.28393
8344	45.313	21.0453	PF00450:Peptidase S10, serine carboxypeptidase ;	GO:0006508-proteolysis ; GO:0004185-serine carboxypeptidase activity ;	Down	0.00629904	0.464443	Yes	-1.10643
8352	1.4046	0.2542	PF00664:ABC transporter, transmembrane region ; PF00005:ABC transporter ;	GO:0016021-integral to membrane ; GO:0042626-ATPase activity, coupled to transmembrane movement of substances ; GO:0017111-nucleoside-triphosphatase activity ; GO:0006810-transport ; GO:0000166-nucleotide binding ; GO:0016887-ATPase activity ; GO:0005524-ATP binding ;	Down	2.63336e-06	0.180977	Yes	-2.46612
8354	2.78291	0.980677	PF00550:Phosphopantetheine-binding ; PF00668:Condensation domain ; PF00501:AMP-dependent synthetase and ligase ;	GO:0048037-cofactor binding ; GO:0003824-catalytic activity ; GO:0008152-metabolic process ; GO:0016874-ligase activity ;	Down	0.00154854	0.352393	Yes	-1.50474
8355	4.59816	1.28104			Down	0.0345297	0.278598	Yes	-1.84374
8356	9.47043	3.68725	PF00550:Phosphopantetheine-binding ; PF00668:Condensation domain ; PF00501:AMP-dependent synthetase and ligase ;	GO:0031177-phosphopantetheine binding ; GO:0003824-catalytic activity ; GO:0005949-aminoadipate-semialdehyde dehydrogenase complex ; GO:0003910-DNA ligase (ATP) activity ; GO:0008152-metabolic process ; GO:0006281-DNA repair ; GO:0006310-DNA recombination ; GO:0048037-cofactor binding ; GO:0006260-DNA replication ; GO:0016874-ligase activity ; GO:0004043-L-aminoadipate-semialdehyde dehydrogenase …	Down	0.000737001	0.389343	Yes	-1.36088
8384	39.025	19.0344	PF04158:Sof1-like protein ; PF00400:G-protein beta WD-40 repeat ;		Down	0.00875904	0.487749	Yes	-1.03579
8386	134.864	33.0014			Down	5.45999e-09	0.244701	Yes	-2.03091
8387	46.6693	20.2088			Down	0.00242258	0.433021	Yes	-1.20749
8388	26.7746	9.93314	PF04997:RNA polymerase Rpb1, domain 1 ; PF04983:RNA polymerase Rpb1, domain 3 ; PF00623:RNA polymerase, alpha subunit ; PF05000:RNA polymerase Rpb1, domain 4 ; PF04998:RNA polymerase Rpb1, domain 5 ;	GO:0003899-DNA-directed RNA polymerase activity ; GO:0003902-DNA-directed RNA polymerase III activity ; GO:0003900-DNA-directed RNA polymerase I activity ; GO:0006350-transcription ; GO:0003901-DNA-directed RNA polymerase II activity ; GO:0034062-RNA polymerase activity ; GO:0003677-DNA binding ;	Down	0.000202093	0.370991	Yes	-1.43054
8409	51.0921	18.2102			Down	8.71275e-05	0.356419	Yes	-1.48835
8429	14.822	6.85543	PF00023:Ankyrin ;	GO:0030731-guanidinoacetate N-methyltransferase activity ;	Down	0.0102905	0.462517	Yes	-1.11242
8439	116.495	43.3681	PF00083:General substrate transporter ;	GO:0016021-integral to membrane ; GO:0006810-transport ; GO:0005215-transporter activity ;	Down	9.83149e-05	0.372274	Yes	-1.42556
8442	6.90568	1.82031			Down	1.87945e-05	0.263596	Yes	-1.9236
8447	46.156	22.1981	PF00117:Glutamine amidotransferase class-I ;	GO:0003922-GMP synthase (glutamine-hydrolyzing) activity ; GO:0003824-catalytic activity ; GO:0006177-GMP biosynthetic process ; GO:0006541-glutamine metabolic process ; GO:0009058-biosynthetic process ; GO:0005524-ATP binding ;	Down	0.00846797	0.480936	Yes	-1.05608
8451	35.9158	14.9029			Down	0.00152145	0.41494	Yes	-1.26903
8465	15.1404	3.14765			Down	0.018475	0.207897	Yes	-2.26606
8466	5.31053	0.957159	PF02535:Zinc transporter ZIP ;	GO:0046873-metal ion transmembrane transporter activity ; GO:0016020-membrane ; GO:0030001-metal ion transport ;	Down	8.41834e-07	0.180238	Yes	-2.47203
8501	9.19723	1.38311		GO:0004339-glucan 1,4-alpha-glucosidase activity ;	Down	3.72016e-13	0.150383	Yes	-2.73328
8516	148.893	70.1182	PF00324:Amino acid permease-associated region ;	GO:0016021-integral to membrane ; GO:0006810-transport ; GO:0016020-membrane ; GO:0015171-amino acid transmembrane transporter activity ; GO:0006865-amino acid transport ;	Down	0.00352832	0.47093	Yes	-1.08642
8528	24.6045	11.3868	PF00271:Helicase, C-terminal ; PF00270:DEAD/DEAH box helicase, N-terminal ;	GO:0008796-bis(5'-nucleosyl)-tetraphosphatase activity ; GO:0008413-8-oxo-7,8-dihydroguanine triphosphatase activity ; GO:0019177-dihydroneopterin triphosphate pyrophosphohydrolase activity ; GO:0008758-UDP-2,3-diacylglucosamine hydrolase activity ; GO:0004787-thiamin-pyrophosphatase activity ; GO:0003676-nucleic acid binding ; GO:0000810-diacylglycerol pyrophosphate phosphatase activity ; GO:000…	Down	0.00437538	0.462793	Yes	-1.11156
8537	1.13339	0.450387	PF00023:Ankyrin ;		Down	0.00846973	0.39738	Yes	-1.33141
8641	18.7478	0.440608	PF00043:Glutathione S-transferase, C-terminal ; PF02798:Glutathione S-transferase, N-terminal ;		Down	5.38042e-11	0.0235019	Yes	-5.41108	0.04
8671	13.1091	5.60987	PF06027:Eukaryotic protein of unknown function DUF914 ;		Down	0.00435103	0.427937	Yes	-1.22453
8677	13.2484	3.06181			Down	9.51806e-09	0.231108	Yes	-2.11336
8682	74.1757	20.3061			Down	2.693e-05	0.273757	Yes	-1.86903
8683	395.303	183.169			Down	0.00317365	0.463364	Yes	-1.10978
8684	276.432	117.628			Down	0.00103778	0.425522	Yes	-1.23269
8714	23.9885	11.5952			Down	0.0253896	0.483365	Yes	-1.04882
8716	5.18921	2.51255		GO:0016021-integral to membrane ; GO:0015103-inorganic anion transmembrane transporter activity ; GO:0015698-inorganic anion transport ; GO:0005215-transporter activity ; GO:0006810-transport ;	Down	0.0298631	0.484187	Yes	-1.04636
8741	5.84647	1.98037	PF00096:Zn-finger, C2H2 type ;	GO:0008270-zinc ion binding ; GO:0003676-nucleic acid binding ; GO:0005622-intracellular ;	Down	0.000663146	0.338729	Yes	-1.5618
8746	6.95071	1.70308			Down	0.000201792	0.245022	Yes	-2.02901
8757	2.44339	1.07281	PF01565:FAD linked oxidase, N-terminal ;	GO:0050660-FAD binding ; GO:0016491-oxidoreductase activity ;	Down	0.0349186	0.439066	Yes	-1.18749
8803	43.9283	13.7027	PF00076:RNA-binding region RNP-1 (RNA recognition motif) ;	GO:0003676-nucleic acid binding ;	Down	3.00615e-06	0.311933	Yes	-1.68069
8812	3.22242	1.44029		GO:0005634-nucleus ;	Down	0.0116518	0.446959	Yes	-1.16179
8964	637.702	196.772			Down	4.46699e-06	0.308564	Yes	-1.69636
8969	19.8842	5.67985			Down	1.71543e-06	0.285646	Yes	-1.8077
8998	14.896	6.19759			Down	0.0025448	0.416057	Yes	-1.26515
9003	36.3767	14.5507	PF00560:Leucine-rich repeat ;	GO:0005515-protein binding ;	Down	0.000482821	0.400001	Yes	-1.32193
9026	52.7695	16.6804	PF02265:S1/P1 nuclease ;	GO:0006308-DNA catabolic process ; GO:0003676-nucleic acid binding ; GO:0004519-endonuclease activity ;	Down	8.25555e-06	0.316099	Yes	-1.66155
9077	40.2302	16.0981		GO:0004339-glucan 1,4-alpha-glucosidase activity ;	Down	0.000248533	0.40015	Yes	-1.32139
9087	3.31719	1.41047	PF01179:Copper amine oxidase ;	GO:0005507-copper ion binding ; GO:0009308-amine metabolic process ; GO:0008131-amine oxidase activity ; GO:0048038-quinone binding ;	Down	0.0161979	0.4252	Yes	-1.23379
9100	6.14268	2.55063			Down	0.00493829	0.415231	Yes	-1.26801
9105	41.5078	14.0953			Down	1.92617e-05	0.339582	Yes	-1.55817
9128	6.52979	2.6932			Down	0.0307898	0.412448	Yes	-1.27772
9129	8.76625	3.98573		GO:0043773-coenzyme F420-0 gamma-glutamyl ligase activity ; GO:0043774-coenzyme F420-2 alpha-glutamyl ligase activity ; GO:0008766-UDP-N-acetylmuramoylalanyl-D-glutamyl-2,6-diaminopimelate-D-alanyl-D-alanine ligase activity ; GO:0018169-ribosomal S6-glutamic acid ligase activity ;	Down	0.0394842	0.454668	Yes	-1.13712
9130	12.4582	5.78906	PF00249:Myb, DNA-binding ;	GO:0043773-coenzyme F420-0 gamma-glutamyl ligase activity ; GO:0018169-ribosomal S6-glutamic acid ligase activity ; GO:0043774-coenzyme F420-2 alpha-glutamyl ligase activity ; GO:0008766-UDP-N-acetylmuramoylalanyl-D-glutamyl-2,6-diaminopimelate-D-alanyl-D-alanine ligase activity ; GO:0003677-DNA binding ;	Down	0.0160715	0.464679	Yes	-1.10569
9183	10.2482	0.969116			Down	3.96615e-11	0.0945645	Yes	-3.40256
9207	30.8262	14.0069	PF06870:A49-like RNA polymerase I associated factor ;	GO:0003899-DNA-directed RNA polymerase activity ; GO:0003902-DNA-directed RNA polymerase III activity ; GO:0003900-DNA-directed RNA polymerase I activity ; GO:0006350-transcription ; GO:0003901-DNA-directed RNA polymerase II activity ; GO:0034062-RNA polymerase activity ; GO:0003677-DNA binding ; GO:0005634-nucleus ;	Down	0.00364066	0.454383	Yes	-1.13802
9213	14.3849	4.61256			Down	1.25827e-05	0.320653	Yes	-1.64092
9273	2.58729	0.144069	PF03330:Rare lipoprotein A ;	GO:0050832-defense response to fungus ; GO:0042742-defense response to bacterium ;	Down	0.000202093	0.0556834	Yes	-4.16661
9290	40.6225	13.5983			Down	2.36701e-05	0.334748	Yes	-1.57885
9291	43.0611	15.3991			Down	0.00115193	0.35761	Yes	-1.48354
9321	32.9689	16.1723	PF00856:Nuclear protein SET ;	GO:0018024-histone-lysine N-methyltransferase activity ; GO:0005634-nucleus ;	Down	0.00998452	0.490532	Yes	-1.02758
9361	1525.1	735.348		GO:0003900-DNA-directed RNA polymerase I activity ; GO:0003902-DNA-directed RNA polymerase III activity ; GO:0003899-DNA-directed RNA polymerase activity ; GO:0034062-RNA polymerase activity ; GO:0003901-DNA-directed RNA polymerase II activity ;	Down	0.0147148	0.482164	Yes	-1.0524
9411	2.86951	0.381405			Down	0.00088359	0.132916	Yes	-2.91141
9450	18.8773	6.62952	PF07653:Variant SH3 ; PF00018:SH3 ;	GO:0043773-coenzyme F420-0 gamma-glutamyl ligase activity ; GO:0016020-membrane ; GO:0018169-ribosomal S6-glutamic acid ligase activity ; GO:0016491-oxidoreductase activity ; GO:0003700-transcription factor activity ; GO:0043774-coenzyme F420-2 alpha-glutamyl ligase activity ; GO:0043565-sequence-specific DNA binding ; GO:0006118-electron transport ; GO:0046983-protein dimerization activity ; GO:…	Down	0.00022671	0.35119	Yes	-1.50968
9451	17.9575	7.05554			Down	0.00962212	0.392902	Yes	-1.34776
9486	30.8897	14.5795	PF04565:RNA polymerase Rpb2, domain 3 ; PF06883:RNA polymerase I, Rpa2 specific ; PF04561:RNA polymerase Rpb2, domain 2 ; PF04563:RNA polymerase beta subunit ; PF04567:RNA polymerase Rpb2, domain 5 ; PF04560:RNA polymerase Rpb2, domain 7 ; PF00562:RNA polymerase Rpb2, domain 6 ;	GO:0003899-DNA-directed RNA polymerase activity ; GO:0003902-DNA-directed RNA polymerase III activity ; GO:0003900-DNA-directed RNA polymerase I activity ; GO:0006350-transcription ; GO:0003901-DNA-directed RNA polymerase II activity ; GO:0034062-RNA polymerase activity ; GO:0003677-DNA binding ; GO:0005634-nucleus ;	Down	0.00535819	0.471986	Yes	-1.08318
9515	9.65228	2.25372	PF07539:Down-regulated in metastasis ;		Down	6.69065e-07	0.233491	Yes	-2.09856
9516	14.1229	3.34303			Down	1.28926e-07	0.23671	Yes	-2.07881
9535	13.436	4.90129			Down	0.000668686	0.364788	Yes	-1.45487
9566	41.2346	16.5034	PF00271:Helicase, C-terminal ; PF00270:DEAD/DEAH box helicase, N-terminal ;	GO:0008796-bis(5'-nucleosyl)-tetraphosphatase activity ; GO:0008413-8-oxo-7,8-dihydroguanine triphosphatase activity ; GO:0019177-dihydroneopterin triphosphate pyrophosphohydrolase activity ; GO:0008758-UDP-2,3-diacylglucosamine hydrolase activity ; GO:0004787-thiamin-pyrophosphatase activity ; GO:0003676-nucleic acid binding ; GO:0000810-diacylglycerol pyrophosphate phosphatase activity ; GO:000…	Down	0.000335188	0.400232	Yes	-1.32109
9571	26.1015	8.87041	PF06628:Catalase-related ; PF00199:Catalase ;	GO:0006979-response to oxidative stress ; GO:0020037-heme binding ; GO:0004096-catalase activity ; GO:0005506-iron ion binding ; GO:0006118-electron transport ;	Down	1.87945e-05	0.339843	Yes	-1.55706
9660	74.1273	31.1344			Down	0.00147861	0.420013	Yes	-1.2515
9677	6.16882	2.31164	PF05922:Proteinase inhibitor I9, subtilisin propeptide ; PF00082:Peptidase S8 and S53, subtilisin, kexin, sedolisin ;	GO:0006508-proteolysis ; GO:0016808-proprotein convertase activity ; GO:0008132-pancreatic elastase activity ; GO:0008243-plasminogen activator activity ; GO:0008991-serine-type signal peptidase activity ; GO:0042802-identical protein binding ; GO:0043086-negative regulation of catalytic activity ; GO:0004289-subtilase activity ;	Down	0.00351084	0.37473	Yes	-1.41608
9685	36.0138	16.9911	PF02548:Ketopantoate hydroxymethyltransferase ;	GO:0015940-pantothenate biosynthetic process ; GO:0003864-3-methyl-2-oxobutanoate hydroxymethyltransferase activity ;	Down	0.00701346	0.471794	Yes	-1.08377
9762	5.48278	2.39757	PF01055:Glycoside hydrolase, family 31 ;	GO:0004558-alpha-glucosidase activity ; GO:0004553-hydrolase activity, hydrolyzing O-glycosyl compounds ; GO:0005975-carbohydrate metabolic process ;	Down	0.00938551	0.437291	Yes	-1.19333
9763	34.86	17.2741	PF01171:PP-loop ;		Down	0.011768	0.495528	Yes	-1.01296
9818	10.9173	5.32807	PF02736:Myosin, N-terminal, SH3-like ; PF00063:Myosin head, motor region ; PF00612:IQ calmodulin-binding region ;	GO:0008570-myosin ATPase activity ; GO:0016459-myosin complex ; GO:0005524-ATP binding ; GO:0003774-motor activity ;	Down	0.0166858	0.488039	Yes	-1.03493
9831	809.996	184.234	PF02772:S-adenosylmethionine synthetase ; PF02773:S-adenosylmethionine synthetase ; PF00438:S-adenosylmethionine synthetase ;	GO:0048269-methionine adenosyltransferase complex ; GO:0006730-one-carbon compound metabolic process ; GO:0004478-methionine adenosyltransferase activity ; GO:0048270-methionine adenosyltransferase regulator activity ; GO:0005524-ATP binding ;	Down	3.61319e-10	0.227451	Yes	-2.13638
9870	122.867	34.6173		GO:0004308-exo-alpha-sialidase activity ;	Down	3.27208e-07	0.281746	Yes	-1.82753
9876	11.1274	2.43941	PF04479:RTA1 like protein ;	GO:0006950-response to stress ; GO:0016021-integral to membrane ;	Down	2.05769e-06	0.219226	Yes	-2.18951
9913	244.727	66.8994			Down	7.18044e-08	0.273363	Yes	-1.87111
9925	1.58414	0.16456	PF00291:Pyridoxal-5'-phosphate-dependent enzyme, beta subunit ;	GO:0003824-catalytic activity ; GO:0008152-metabolic process ; GO:0030170-pyridoxal phosphate binding ;	Down	0.000459476	0.10388	Yes	-3.26701
9927	83.6726	26.6107			Down	2.83442e-06	0.318034	Yes	-1.65275
9933	17.6774	7.44883			Down	0.00414528	0.421376	Yes	-1.24682
9936	24.628	9.03773			Down	0.000169264	0.36697	Yes	-1.44627
9938	129.661	59.6979			Down	0.00353834	0.460415	Yes	-1.11899
9940	71.8729	10.7764	PF01565:FAD linked oxidase, N-terminal ;	GO:0050660-FAD binding ; GO:0016491-oxidoreductase activity ;	Down	0	0.149937	Yes	-2.73757
9941	5.21651	1.1831			Down	4.13983e-05	0.226799	Yes	-2.14051
9956	73.5828	31.8829	PF00005:ABC transporter ;	GO:0000166-nucleotide binding ; GO:0017111-nucleoside-triphosphatase activity ; GO:0016887-ATPase activity ; GO:0005524-ATP binding ;	Down	0.00207914	0.433293	Yes	-1.20659
10003	30.9831	11.4225	PF01794:Ferric reductase-like transmembrane component ;	GO:0000293-ferric-chelate reductase activity ;	Down	6.39057e-05	0.368669	Yes	-1.4396
10011	1.53149	0.519311		GO:0016021-integral to membrane ; GO:0006810-transport ; GO:0005215-transporter activity ;	Down	0.0211886	0.339089	Yes	-1.56027
10035	24.6497	9.69561			Down	0.000370058	0.393336	Yes	-1.34617
10036	17.1746	6.44964	PF00400:G-protein beta WD-40 repeat ;		Down	0.000333335	0.375534	Yes	-1.41299
10039	21.7409	6.61289			Down	0.000763242	0.304168	Yes	-1.71706
10125	212.828	54.2884	PF03928:Protein of unknown function DUF336 ;		Down	3.9741e-07	0.255081	Yes	-1.97097
10190	4.18266	1.08609	PF02458:Transferase ;		Down	0.000103671	0.259665	Yes	-1.94528
10199	22.3917	8.20601			Down	0.000441096	0.366476	Yes	-1.44821
10221	174.852	52.7274		GO:0019131-tripeptidyl-peptidase I activity ;	Down	4.00948e-07	0.301554	Yes	-1.72951
10226	335.421	56.8231	PF01717:Methionine synthase, vitamin-B12 independent ;	GO:0009086-methionine biosynthetic process ; GO:0003871-5-methyltetrahydropteroyltriglutamate-homocysteine S-methyltransferase activity ;	Down	0	0.169408	Yes	-2.56142
10230	6.8258	3.22196	PF06165:Glycosyltransferase 36 ;		Down	0.0135608	0.472027	Yes	-1.08306
10251	17.5512	7.02186	PF04006:Mpp10 protein ;		Down	0.000653986	0.400079	Yes	-1.32164
10288	41.3201	14.865	PF00487:Fatty acid desaturase ;	GO:0050184-phosphatidylcholine desaturase activity ; GO:0016020-membrane ; GO:0006629-lipid metabolic process ; GO:0016717-oxidoreductase activity, acting on paired donors, with oxidation of a pair of donors resulting in the reduction of molecular oxygen to two molecules of water ; GO:0016491-oxidoreductase activity ;	Down	6.75736e-05	0.359752	Yes	-1.47492
10304	1.19637	0.295468	PF00023:Ankyrin ;	GO:0003950-NAD+ ADP-ribosyltransferase activity ;	Down	0.00686401	0.24697	Yes	-2.01759
10331	18.7264	5.29312	PF04615:Utp14 protein ;	GO:0003918-DNA topoisomerase (ATP-hydrolyzing) activity ; GO:0005694-chromosome ; GO:0003910-DNA ligase (ATP) activity ; GO:0006364-rRNA processing ; GO:0006265-DNA topological change ; GO:0003677-DNA binding ; GO:0032040-small subunit processome ; GO:0005524-ATP binding ;	Down	8.70272e-07	0.282656	Yes	-1.82288
10335	76.63	36.5383			Down	0.0100982	0.476815	Yes	-1.0685
10353	13.9413	5.93482		GO:0006979-response to oxidative stress ; GO:0004601-peroxidase activity ; GO:0006118-electron transport ; GO:0020037-heme binding ;	Down	0.00304256	0.425701	Yes	-1.23209
10355	24.0578	8.52503	PF00078:RNA-directed DNA polymerase (Reverse transcriptase) ;	GO:0006278-RNA-dependent DNA replication ; GO:0003964-RNA-directed DNA polymerase activity ; GO:0003723-RNA binding ;	Down	0.000678851	0.354356	Yes	-1.49673
10358	16.4491	7.78329	PF00026:Peptidase A1, pepsin ;	GO:0004194-pepsin A activity ; GO:0004190-aspartic-type endopeptidase activity ; GO:0006508-proteolysis ;	Down	0.0208218	0.473174	Yes	-1.07956
10359	20.6941	10.0442	PF00271:Helicase, C-terminal ; PF00270:DEAD/DEAH box helicase, N-terminal ;	GO:0008796-bis(5'-nucleosyl)-tetraphosphatase activity ; GO:0008413-8-oxo-7,8-dihydroguanine triphosphatase activity ; GO:0019177-dihydroneopterin triphosphate pyrophosphohydrolase activity ; GO:0008758-UDP-2,3-diacylglucosamine hydrolase activity ; GO:0004787-thiamin-pyrophosphatase activity ; GO:0003676-nucleic acid binding ; GO:0000810-diacylglycerol pyrophosphate phosphatase activity ; GO:000…	Down	0.0102604	0.485365	Yes	-1.04286
10378	12.9459	6.039	PF00929:Exonuclease ;	GO:0004527-exonuclease activity ; GO:0005622-intracellular ;	Down	0.0103715	0.46648	Yes	-1.10011
10379	583.28	70.4902			Down	0	0.120851	Yes	-3.04869
10394	115.15	50.0322			Down	0.0149372	0.434496	Yes	-1.20259
10395	25.7915	7.8487			Down	0.000430899	0.304313	Yes	-1.71637
10404	32.1771	7.39248	PF03211:Pectate lyase ;	GO:0005576-extracellular region ; GO:0030570-pectate lyase activity ;	Down	8.64016e-07	0.229744	Yes	-2.1219
10411	72.4703	12.3519	PF00083:General substrate transporter ;	GO:0016021-integral to membrane ; GO:0016020-membrane ; GO:0005215-transporter activity ; GO:0008643-carbohydrate transport ; GO:0006810-transport ; GO:0005351-sugar:hydrogen symporter activity ;	Down	1.22972e-12	0.170441	Yes	-2.55266
10425	38.2385	15.3808			Down	0.00249269	0.402233	Yes	-1.3139
10429	41.7716	14.4502			Down	0.00088359	0.345934	Yes	-1.53143
10436	79.7371	26.8934			Down	0.00107457	0.337276	Yes	-1.568
10458	542.748	257		GO:0003676-nucleic acid binding ;	Down	0.0070394	0.473516	Yes	-1.07851
10460	45.7739	22.8324			Down	0.0262247	0.498808	Yes	-1.00344
10473	57.7929	21.4812			Down	0.0157834	0.371693	Yes	-1.42782
10475	52.3029	21.2215			Down	0.00148606	0.405742	Yes	-1.30136
10497	44.7427	17.2431			Down	0.00235034	0.385384	Yes	-1.37563
10505	11.4852	3.36424			Down	5.16964e-05	0.29292	Yes	-1.77142
10514	10.3811	3.10163	PF00271:Helicase, C-terminal ;	GO:0008026-ATP-dependent helicase activity ; GO:0003676-nucleic acid binding ; GO:0004386-helicase activity ; GO:0005524-ATP binding ;	Down	9.65182e-05	0.298777	Yes	-1.74286
10578	44.2368	16.1966	PF00043:Glutathione S-transferase, C-terminal ; PF02798:Glutathione S-transferase, N-terminal ;	GO:0004364-glutathione transferase activity ;	Down	0.00122963	0.366134	Yes	-1.44956
10601	26.8354	11.0303			Down	0.00364066	0.411035	Yes	-1.28267
10622	4.23214	1.4758			Down	0.0449103	0.348712	Yes	-1.51989
10647	4.59805	0	PF04110:Autophagy protein Apg12 ;	GO:0005737-cytoplasm ; GO:0000045-autophagic vacuole formation ;	Down	0.0179714	0	Yes	#NUM!
10651	13.2598	5.78303			Down	0.0272349	0.436133	Yes	-1.19716
10658	7.47474	1.3916	PF00096:Zn-finger, C2H2 type ;	GO:0008270-zinc ion binding ; GO:0003676-nucleic acid binding ; GO:0005622-intracellular ;	Down	5.578e-05	0.186174	Yes	-2.42528
10662	93.8337	36.2808			Down	0.00415148	0.38665	Yes	-1.3709
qRT-PCR results were calculated by delta delta Ct = [(Ct (gene i)-C t(Ef1-alpha) in Bdtf1 mutant -(Ct (gene i) - Ct (Ef1-alpha)) in wild type.

## Sheet: Table S3
Table S3. Differentially expressed genes in both experimental conditions.
YORF	NAME	Log2Brassinin	Log2-44hpi
AB00715		1.6758	1.11627
AB03063	GO:0004553-hydrolase activity, hydrolyzing O-glycosyl compounds ; GO:0005975-carbohydrate metabolic process ;	1.27402	1.37875
AB04305		6.88688	2.51434
AB04350		1.4756	1.16308
AB05507	GO:0050660-FAD binding ; GO:0008061-chitin binding ; GO:0016491-oxidoreductase activity ;	1.7992	1.24867
AB06313	PF07249:Cerato-platanin ;	1.31765	2.20864
AB06321	GO:0003824-catalytic activity ;	1.29121	1.4072
AB06545		1.32199	1.11818
AB06581	GO:0016614-oxidoreductase activity, acting on CH-OH group of donors ; GO:0050660-FAD binding ;	1.76413	1.25426
AB06582	GO:0016491-oxidoreductase activity ; GO:0005506-iron ion binding ; GO:0009058-biosynthetic process ;	1.59688	1.36041
AB06621		2.11556	1.08193
AB06750		1.356	1.29518
AB07373	GO:0016021-integral to membrane ; GO:0042626-ATPase activity, coupled to transmembrane movement of substances ; GO:0017111-nucleoside-triphosphatase activity ; GO:0006810-transport ; GO:0000166-nucleotide binding ; GO:0016887-ATPase activity ; GO:0005524-ATP binding ;	1.05698	1.42647
AB07374	GO:0016887-ATPase activity ; GO:0005524-ATP binding ;	1.42415	1.40658
AB09101		1.19307	1.04593
AB01239		1.58708	-1.08322
AB02056		1.28004	-1.25247
AB03010	GO:0016831-carboxy-lyase activity ;	1.02388	-1.1121
AB03012	GO:0003824-catalytic activity ; GO:0008152-metabolic process ;	1.30671	-1.36352
AB03789	PF04419:Four F5 protein ;	1.20766	-2.57859
AB03939		1.59959	-1.12707
AB04228		1.16384	-1.13043
AB08566		2.09768	-1.13361
AB00053	GO:0051700-fructosyl-amino acid oxidase activity ; GO:0006562-proline catabolic process ; GO:0006537-glutamate biosynthetic process ; GO:0004657-proline dehydrogenase activity ; GO:0004154-dihydropterin oxidase activity ; GO:0019116-hydroxy-nicotine oxidase activity ; GO:0051699-proline oxidase activity ;	-1.11837	1.47436
AB00094		-1.09545	1.15294
AB01487		-1.49199	1.27376
AB02424	GO:0016985-mannan endo-1,4-beta-mannosidase activity ; GO:0006080-substituted mannan metabolic process ;	-1.52065	1.20998
AB04330		-1.35143	1.10713
AB05539	GO:0016491-oxidoreductase activity ;	-1.6067	1.39986
AB06658	GO:0006730-one-carbon compound metabolic process ; GO:0008270-zinc ion binding ; GO:0004089-carbonate dehydratase activity ;	-2.54708	1.05817
AB06928		-1.15995	1.14658
AB09087	GO:0005507-copper ion binding ; GO:0009308-amine metabolic process ; GO:0008131-amine oxidase activity ; GO:0048038-quinone binding ;	-1.23379	1.24386
AB09677	GO:0006508-proteolysis ; GO:0016808-proprotein convertase activity ; GO:0008132-pancreatic elastase activity ; GO:0008243-plasminogen activator activity ; GO:0008991-serine-type signal peptidase activity ; GO:0042802-identical protein binding ; GO:0043086-negative regulation of catalytic activity ; GO:0004289-subtilase activity ;	-1.41608	1.0174
AB09762	GO:0004558-alpha-glucosidase activity ; GO:0004553-hydrolase activity, hydrolyzing O-glycosyl compounds ; GO:0005975-carbohydrate metabolic process ;	-1.19333	1.11184
AB09925	GO:0003824-catalytic activity ; GO:0008152-metabolic process ; GO:0030170-pyridoxal phosphate binding ;	-3.26701	1.42464
AB10039		-1.71706	1.03083
AB10379		-3.04869	1.01668
AB01296	GO:0043826-sulfur oxygenase reductase activity ; GO:0043738-F420H2 dehydrogenase activity ; GO:0043883-malolactic enzyme activity ; GO:0051341-regulation of oxidoreductase activity ; GO:0016491-oxidoreductase activity ;	-1.2048	-1.10849
AB01545		-1.01281	-1.02462
AB02662	GO:0016491-oxidoreductase activity ;	-1.08465	-1.18356
AB02663	GO:0016787-hydrolase activity ; GO:0008152-metabolic process ;	-1.44502	-1.65926
AB03046	GO:0016021-integral to membrane ; GO:0016020-membrane ; GO:0005215-transporter activity ; GO:0008643-carbohydrate transport ; GO:0006810-transport ; GO:0005351-sugar:hydrogen symporter activity ;	-2.4234	-1.14273
AB03484		-2.50881	-1.56363
AB03487		-2.47778	-1.01845
AB03793		-2.05929	-1.31965
AB04177		-2.30495	-1.06681
AB05764	GO:0008482-sulfite oxidase activity ; GO:0030151-molybdenum ion binding ; GO:0006118-electron transport ; GO:0016491-oxidoreductase activity ;	-1.76152	-2.42105
AB07899	GO:0003700-transcription factor activity ; GO:0006350-transcription ; GO:0008270-zinc ion binding ; GO:0003677-DNA binding ; GO:0006355-regulation of transcription, DNA-dependent ; GO:0005634-nucleus ;	-9	-9.11388
AB08215	GO:0003856-3-dehydroquinate synthase activity ; GO:0009073-aromatic amino acid family biosynthetic process ;	-1.58781	-2.74046
AB08641	PF00043:Glutathione S-transferase, C-terminal ; PF02798:Glutathione S-transferase, N-terminal ;	-5.41108	-3.60616
AB09938		-1.11899	-1.29493
AB10411	GO:0016021-integral to membrane ; GO:0016020-membrane ; GO:0005215-transporter activity ; GO:0008643-carbohydrate transport ; GO:0006810-transport ; GO:0005351-sugar:hydrogen symporter activity ;	-2.55266	-1.12065
